# Supplementary material for: Occupational Burnout and the Protective Role of Sports Viewing Among Male ICU Physicians in China: A Nationwide Survey on Influencing Factors and Pathways
Source: Research Square preprint supplement (doi:10.21203/rs.3.rs-8251094/v1), 2025-12-15
Supplement: Supplementary file 1 [file 91d3ecfb83bcd07585b95844.docx]

**Part 1: Demographic and Work Characteristics** *(Please select only one option for each question)*

**A. Age** □ <30 years □ 30-34 years □ 35-39 years □ 40-44 years □ ≥45 years

**B. Professional Title** □ Resident Physician □ Attending Physician □ Associate Chief Physician □ Chief Physician

**C. Total Years of Clinical Experience** □ <3 years □ 3-5 years □ 6-10 years □ >10 years **D. Years of ICU Work Experience** □ <2 years □ 2-5 years □ >5 years

**E. Average Weekly Working Hours** □ <50 h □ 50-60 h □ 61-70 h □ 71-80 h □ >80 h **F. Average Number of Night Shifts per Month** □ ≤4 □ 5-8 □ ≥9

**G. Hospital Characteristics**

- **Hospital Grade:** □ Tertiary Grade A □ Non-Tertiary Grade A
- **ICU Size (Beds):** □ Large (≥20 beds) □ Medium (10-19 beds) □ Small (<10 beds)
- **Geographic Region:** □ Eastern China □ Central China □ Western China □ Northeastern China

**Part 2: Occupational Burnout Assessment** *(Please indicate how often you experience each of the following feelings related to your work. Select one point on the 7-point scale for each item, where 1=Never and 7=Every day)* **A. Emotional Exhaustion**

1. My work makes me feel emotionally drained. (Scale: □1 □2 □3 □4 □5 □6 □7)
2. I feel used up at the end of the workday. (Scale: □1 □2 □3 □4 □5 □6 □7)
3. I feel fatigued in the morning at the thought of another workday. (Scale: □1 □2 □3 □4 □5 □6 □7)
4. I often feel there is not enough time to complete my work tasks. (Scale: □1 □2 □3 □4 □5 □6 □7)

**B. Depersonalization**

1. I have become more callous toward people since I started this job. (Scale: □1 □2 □3 □4 □5 □6 □7)
2. I doubt the significance of my work. (Scale: □1 □2 □3 □4 □5 □6 □7)
3. I find myself lacking patience with colleagues or patients. (Scale: □1 □2 □3 □4 □5 □6 □7)

**C. Personal Accomplishment**​ (Items are reverse-scored)

1. I can effectively solve problems at work. (Scale: □1 □2 □3 □4 □5 □6 □7)
2. I believe my work has a positive impact on others. (Scale: □1 □2 □3 □4 □5 □6 □7)
3. I feel confident about my abilities. (Scale: □1 □2 □3 □4 □5 □6 □7)

**Attention Check:**​ Please select your answer for Question 1 (Emotional Exhaustion) again. (Scale: □1 □2 □3 □4 □5 □6 □7)

**Part 3: Sports Spectating Behavior** **A. Basic Behaviors**

1. **Average weekly time spent watching sports?** □ Never watch (If selected, please skip to Question 13) □ <1 hour □ 1-3 hours □ 3-5 hours □ >5 hours
2. **Which sports do you most frequently watch?**​ *(Select all that apply)* □ Football (e.g., FIFA World Cup, UEFA European Championship) □ Basketball (e.g., NBA, CBA) □ Table Tennis / Badminton □ E-sports □ Multi-sport Events (e.g., Olympics, Asian Games) □ Other (Please specify): ______
3. **Primary mode of viewing?** □ Live broadcast (TV/Online streaming) □ Short video highlights □ In-person / Public venues □ Text-based match reports

**B. Major Event Engagement**

1. **Attention to top-tier events (e.g., Olympics, World Cup)?** □ Watch every edition □ Only watch events involving the national team □ Watch occasionally □ Never follow
2. **Viewing strategy for major tournaments?** □ Follow important matches comprehensively □ Only watch finals/key matches □ Catch up via highlights □ Participate in online discussions
3. **Does your hospital provide any support for watching major events?** □ Schedule adjustments □ Broadcasts in break rooms □ No specific arrangements □ Expressly prohibited

**C. Behavioral Impact**

1. **Do you adjust your sleep schedule (e.g., stay up late) to watch sports?** □ Frequently □ Occasionally □ Never
2. **Typical viewing context?** □ Alone □ With family □ With colleagues/friends □ Fan club activities
3. **Are you a member of any sports-related fan communities or groups?** □ Yes → Please specify: ______ □ No

**D. Perceived Psychological Impact**​ (Please rate from 1=Strongly Disagree to 5=Strongly Agree)

1. Watching major sporting events significantly helps me relieve stress. (Scale: □1 □2 □3 □4 □5)
2. The performance of the national team affects my mood. (Scale: □1 □2 □3 □4 □5)
3. Discussing sports events improves the atmosphere at my workplace. (Scale: □1 □2 □3 □4 □5)
