# Supplementary material for: Occupational Burnout and the Protective Role of Sports Viewing Among Male ICU Physicians in China: A Nationwide Survey on Influencing Factors and Pathways
Source: Research Square preprint supplement (doi:10.21203/rs.3.rs-8251094/v1), 2025-12-15
Supplement: Supplementary file 2 [file f389caa84dea39cfefdb9e89.xlsx]

## Sheet: Sheet1
编号	有无倦怠分组	等级分组	年龄	职称	ICU工作年限	平均每周工作时长	平均每月夜班次数	医院级别	ICU规模	所在区域	平均每周观赛时长	项目足球	项目篮球	项目乒乓球羽毛球	项目电子竞技	项目奥运会	项目其他	主要观赛方式	对赛事关注情况	观赛策略	医院提供观赛支持	因观赛调整作息	观赛场景	加入体育社群	心理影响1	心理影响2	心理影响3	情绪耗竭	去人格化	个人成就感	总分
1	无倦怠		<30岁	住院医师	<2年	50-60h	5-8次	三甲医院	大型	中部	3-5h	是	是	否	否	否	否	直播	每届都看	参与线上讨论	调班排版	偶尔	独自观看	是	3	3	2	3	4	5	12
2	有倦怠	轻度倦怠	30-34岁	主治医师	2-5年	50-60h	5-8次	非三甲医院	小型	中部	<1h	是	否	否	否	否	是	直播	每届都看	通过集锦了解	无安排	从不	独自观看	否	4	3	4	5	14	7	26
3	有倦怠	轻度倦怠	30-34岁	住院医师	2-5年	50-60h	5-8次	三甲医院	大型	西部	3-5h	否	是	否	否	是	否	直播	每届都看	只看决赛/关键场次	无安排	偶尔	与同事/朋友	否	2	3	3	10	6	5	21
4	有倦怠	轻度倦怠	40-44岁	副主任医师	>5年	61-70h	5-8次	非三甲医院	小型	西部	1-3h	否	否	否	是	否	否	图文战报	主要看中国队比赛	只看决赛/关键场次	无安排	偶尔	与同事/朋友	否	3	2	3	9	8	10	27
5	有倦怠	轻度倦怠	40-44岁	主任医师	>5年	>80h	5-8次	三甲医院	大型	西部	3-5h	否	是	否	否	否	否	短视频片段	主要看中国队比赛	参与线上讨论	无安排	偶尔	球迷组织活动	否	3	3	3	7	7	10	24
6	有倦怠	轻度倦怠	40-44岁	副主任医师	>5年	50-60h	5-8次	非三甲医院	大型	西部	1-3h	是	否	否	否	否	否	短视频片段	主要看中国队比赛	只看决赛/关键场次	无安排	偶尔	与同事/朋友	否	2	2	3	7	5	7	19
7	无倦怠		35-39岁	主任医师	>5年	50-60h	5-8次	非三甲医院	中型	中部	1-3h	是	是	是	否	是	否	现场/公共场所	偶尔看看	只看决赛/关键场次	调班排版	偶尔	与同事/朋友	否	4	3	3	5	7	2	14
8	有倦怠	轻度倦怠	40-44岁	副主任医师	>5年	50-60h	5-8次	三甲医院	大型	西部	1-3h	是	是	是	否	否	否	直播	每届都看	参与线上讨论	无安排	经常	与同事/朋友	否	3	3	3	9	7	7	23
9	无倦怠		30-34岁	主治医师	2-5年	50-60h	5-8次	非三甲医院	小型	东北	<1h	是	是	否	否	否	否	现场/公共场所	每届都看	只看决赛/关键场次	调班排版	从不	独自观看	否	2	3	3	4	3	5	12
10	有倦怠	轻度倦怠	30-34岁	主治医师	2-5年	>80h	5-8次	三甲医院	大型	西部	3-5h	是	是	是	否	是	否	短视频片段	主要看中国队比赛	只看决赛/关键场次	无安排	偶尔	与家人	否	3	2	4	7	10	6	23
11	有倦怠	中度倦怠	40-44岁	主治医师	>5年	50-60h	5-8次	三甲医院	大型	东北	3-5h	是	否	否	否	否	否	直播	每届都看	只看决赛/关键场次	无安排	偶尔	与同事/朋友	否	3	3	3	6	12	14	32
12	有倦怠	重度倦怠	30-34岁	主治医师	2-5年	61-70h	≥9次	三甲医院	大型	东部	1-3h	否	否	是	是	否	否	直播	基本不看	只看决赛/关键场次	无安排	偶尔	与同事/朋友	是	3	2	2	13	19	10	42
13	有倦怠	重度倦怠	<30岁	住院医师	<2年	<50h	≤4次	三甲医院	大型	西部	<1h	否	否	否	是	是	否	短视频片段	每届都看	全程跟踪重要比赛	无安排	偶尔	与同事/朋友	否	4	3	3	14	13	17	44
14	有倦怠	轻度倦怠	35-39岁	主治医师	>5年	<50h	≤4次	三甲医院	大型	东部	<1h	否	否	是	是	是	否	现场/公共场所	主要看中国队比赛	只看决赛/关键场次	无安排	偶尔	独自观看	是	3	3	3	7	7	5	19
15	有倦怠	中度倦怠	35-39岁	主治医师	>5年	50-60h	5-8次	非三甲医院	小型	东北	1-3h	是	否	否	否	否	否	短视频片段	每届都看	只看决赛/关键场次	无安排	偶尔	独自观看	是	3	4	2	8	12	12	32
16	无倦怠		35-39岁	主治医师	2-5年	50-60h	5-8次	三甲医院	小型	东北	<1h	是	是	否	否	否	是	现场/公共场所	每届都看	只看决赛/关键场次	无安排	偶尔	独自观看	否	4	2	3	5	3	0	8
17	有倦怠	轻度倦怠	35-39岁	副主任医师	>5年	50-60h	5-8次	三甲医院	大型	西部	3-5h	否	否	否	是	否	否	直播	每届都看	只看决赛/关键场次	无安排	偶尔	独自观看	否	3	3	4	4	8	5	17
18	有倦怠	轻度倦怠	40-44岁	副主任医师	>5年	50-60h	5-8次	非三甲医院	小型	中部	>5h	否	否	是	是	否	否	现场/公共场所	每届都看	只看决赛/关键场次	调班排版	从不	与家人	否	3	3	3	10	8	10	28
19	有倦怠	轻度倦怠	35-39岁	主治医师	>5年	50-60h	5-8次	三甲医院	大型	中部	<1h	否	否	否	否	否	是	直播	偶尔看看	只看决赛/关键场次	无安排	偶尔	独自观看	否	2	3	4	8	9	10	27
20	有倦怠	重度倦怠	35-39岁	主治医师	>5年	61-70h	≤4次	非三甲医院	中型	东部	>5h	是	是	否	否	否	否	短视频片段	每届都看	全程跟踪重要比赛	无安排	偶尔	与家人	否	3	4	4	17	14	13	44
21	有倦怠	轻度倦怠	40-44岁	副主任医师	>5年	50-60h	5-8次	三甲医院	大型	西部	>5h	否	是	是	是	是	否	直播	基本不看	参与线上讨论	无安排	从不	独自观看	否	3	3	3	4	9	11	24
22	有倦怠	轻度倦怠	≥45岁	副主任医师	>5年	<50h	≤4次	三甲医院	大型	中部	3-5h	否	否	否	是	是	否	直播	主要看中国队比赛	参与线上讨论	无安排	偶尔	与同事/朋友	否	4	3	3	5	16	7	28
23	有倦怠	轻度倦怠	≥45岁	主任医师	>5年	50-60h	≤4次	非三甲医院	中型	东部	<1h	是	是	否	否	否	否	短视频片段	每届都看	全程跟踪重要比赛	无安排	偶尔	独自观看	否	3	3	3	7	8	11	26
24	有倦怠	中度倦怠	35-39岁	副主任医师	>5年	71-80h	≥9次	三甲医院	大型	中部	<1h	是	是	是	否	否	否	短视频片段	每届都看	只看决赛/关键场次	无安排	经常	独自观看	是	3	3	4	13	12	10	35
25	有倦怠	中度倦怠	40-44岁	主治医师	>5年	71-80h	≥9次	三甲医院	小型	中部	3-5h	否	否	否	是	否	否	短视频片段	主要看中国队比赛	只看决赛/关键场次	无安排	偶尔	球迷组织活动	是	3	3	3	16	14	3	33
26	有倦怠	中度倦怠	<30岁	住院医师	<2年	50-60h	5-8次	三甲医院	大型	中部	1-3h	否	否	否	否	否	是	图文战报	每届都看	只看决赛/关键场次	无安排	偶尔	与家人	否	3	4	3	11	10	11	32
27	无倦怠		≥45岁	副主任医师	>5年	50-60h	5-8次	三甲医院	大型	东部	3-5h	是	是	是	否	否	否	直播	主要看中国队比赛	全程跟踪重要比赛	无安排	从不	与家人	否	3	3	3	7	3	3	13
28	有倦怠	中度倦怠	35-39岁	主治医师	>5年	50-60h	5-8次	非三甲医院	小型	中部	<1h	是	否	否	否	是	否	图文战报	每届都看	参与线上讨论	无安排	偶尔	独自观看	是	3	3	3	7	13	9	29
29	有倦怠	轻度倦怠	30-34岁	主治医师	2-5年	50-60h	5-8次	三甲医院	大型	西部	1-3h	是	是	否	否	否	否	现场/公共场所	偶尔看看	只看决赛/关键场次	无安排	偶尔	与家人	否	3	3	3	6	10	11	27
30	有倦怠	轻度倦怠	<30岁	住院医师	<2年	71-80h	≥9次	三甲医院	中型	西部	1-3h	否	否	否	否	是	是	短视频片段	主要看中国队比赛	全程跟踪重要比赛	无安排	从不	与同事/朋友	否	3	3	2	9	4	5	18
31	有倦怠	中度倦怠	<30岁	住院医师	<2年	50-60h	5-8次	非三甲医院	中型	东部	1-3h	否	否	否	否	是	否	短视频片段	主要看中国队比赛	全程跟踪重要比赛	无安排	偶尔	球迷组织活动	是	3	2	3	10	4	16	30
32	有倦怠	轻度倦怠	40-44岁	副主任医师	>5年	50-60h	5-8次	三甲医院	大型	东部	<1h	是	是	否	是	是	否	直播	每届都看	通过集锦了解	无安排	偶尔	独自观看	否	4	3	4	6	6	8	20
33	有倦怠	中度倦怠	35-39岁	主治医师	>5年	61-70h	≥9次	非三甲医院	大型	东北	<1h	是	是	否	否	否	否	直播	每届都看	只看决赛/关键场次	无安排	偶尔	与同事/朋友	否	3	4	4	10	17	7	34
34	无倦怠		<30岁	住院医师	2-5年	61-70h	≥9次	三甲医院	大型	东北	3-5h	是	是	否	否	是	是	短视频片段	每届都看	只看决赛/关键场次	无安排	偶尔	独自观看	否	2	2	3	4	3	6	13
35	有倦怠	重度倦怠	<30岁	住院医师	<2年	>80h	≥9次	三甲医院	大型	西部	<1h	否	否	否	否	否	是	短视频片段	每届都看	只看决赛/关键场次	无安排	偶尔	球迷组织活动	否	3	4	2	12	15	16	43
36	有倦怠	中度倦怠	40-44岁	主任医师	>5年	50-60h	5-8次	非三甲医院	中型	东部	1-3h	是	否	否	否	是	否	现场/公共场所	每届都看	只看决赛/关键场次	无安排	偶尔	与家人	否	2	3	2	9	12	10	31
37	有倦怠	中度倦怠	<30岁	住院医师	<2年	50-60h	≤4次	三甲医院	大型	东部	<1h	否	否	否	否	否	是	短视频片段	每届都看	只看决赛/关键场次	无安排	经常	独自观看	否	3	4	3	14	10	7	31
38	有倦怠	中度倦怠	<30岁	住院医师	2-5年	50-60h	5-8次	三甲医院	大型	西部	>5h	否	否	否	否	是	否	直播	偶尔看看	全程跟踪重要比赛	无安排	从不	独自观看	否	3	3	3	5	11	14	30
39	有倦怠	轻度倦怠	35-39岁	主治医师	>5年	>80h	5-8次	三甲医院	大型	中部	3-5h	是	是	否	否	是	否	现场/公共场所	每届都看	只看决赛/关键场次	无安排	从不	球迷组织活动	否	3	3	3	7	8	8	23
40	有倦怠	轻度倦怠	40-44岁	主治医师	>5年	50-60h	≤4次	三甲医院	大型	西部	>5h	否	否	否	否	否	是	直播	主要看中国队比赛	全程跟踪重要比赛	无安排	偶尔	与同事/朋友	否	3	4	3	5	11	10	26
41	有倦怠	轻度倦怠	35-39岁	副主任医师	>5年	61-70h	≥9次	三甲医院	大型	东部	3-5h	否	否	否	否	是	否	直播	基本不看	只看决赛/关键场次	无安排	偶尔	独自观看	是	3	4	4	7	5	15	27
42	无倦怠		40-44岁	主治医师	>5年	50-60h	≥9次	非三甲医院	小型	东部	3-5h	否	否	否	否	是	是	直播	主要看中国队比赛	只看决赛/关键场次	无安排	偶尔	与同事/朋友	否	3	3	3	4	4	2	10
43	有倦怠	轻度倦怠	35-39岁	主治医师	>5年	<50h	≤4次	三甲医院	大型	东北	3-5h	否	否	否	是	否	否	图文战报	主要看中国队比赛	通过集锦了解	无安排	偶尔	独自观看	否	3	3	3	10	6	5	21
44	无倦怠		40-44岁	副主任医师	>5年	<50h	≥9次	三甲医院	大型	东部	3-5h	是	否	否	否	是	否	现场/公共场所	每届都看	参与线上讨论	无安排	经常	球迷组织活动	是	3	4	3	5	3	6	14
45	有倦怠	中度倦怠	<30岁	住院医师	<2年	50-60h	≤4次	非三甲医院	小型	西部	<1h	是	否	否	否	是	否	短视频片段	每届都看	通过集锦了解	无安排	偶尔	与同事/朋友	是	3	3	4	9	13	11	33
46	有倦怠	中度倦怠	30-34岁	主治医师	>5年	71-80h	≥9次	三甲医院	小型	中部	3-5h	否	是	否	否	是	否	直播	主要看中国队比赛	只看决赛/关键场次	休息区播放	经常	独自观看	是	3	3	2	13	7	12	32
47	无倦怠		40-44岁	主治医师	>5年	50-60h	≤4次	三甲医院	大型	东部	1-3h	否	否	是	否	否	否	短视频片段	主要看中国队比赛	只看决赛/关键场次	无安排	偶尔	独自观看	否	3	3	3	3	3	6	12
48	有倦怠	中度倦怠	30-34岁	副主任医师	>5年	71-80h	5-8次	三甲医院	大型	中部	1-3h	是	是	否	是	否	否	直播	主要看中国队比赛	只看决赛/关键场次	无安排	偶尔	与同事/朋友	否	3	4	3	12	10	7	29
49	有倦怠	重度倦怠	≥45岁	副主任医师	>5年	61-70h	5-8次	三甲医院	大型	中部	1-3h	否	否	否	否	否	是	短视频片段	主要看中国队比赛	只看决赛/关键场次	无安排	偶尔	独自观看	否	3	3	3	18	15	13	46
50	有倦怠	中度倦怠	35-39岁	副主任医师	>5年	50-60h	5-8次	三甲医院	大型	东部	>5h	否	否	否	否	否	是	短视频片段	主要看中国队比赛	参与线上讨论	无安排	偶尔	与家人	否	3	3	3	11	6	15	32
51	无倦怠		30-34岁	住院医师	<2年	50-60h	≤4次	三甲医院	中型	西部	1-3h	否	是	否	否	否	否	短视频片段	每届都看	只看决赛/关键场次	休息区播放	偶尔	与同事/朋友	否	2	3	3	7	3	4	14
52	无倦怠		35-39岁	主任医师	>5年	61-70h	5-8次	三甲医院	中型	西部	3-5h	否	否	否	否	否	是	直播	每届都看	只看决赛/关键场次	无安排	偶尔	独自观看	否	2	3	3	4	3	2	9
53	有倦怠	轻度倦怠	30-34岁	主治医师	2-5年	50-60h	5-8次	三甲医院	小型	西部	3-5h	否	否	否	否	否	是	图文战报	主要看中国队比赛	参与线上讨论	调班排版	从不	与同事/朋友	否	3	3	4	5	9	10	24
54	有倦怠	轻度倦怠	35-39岁	主治医师	>5年	50-60h	≤4次	非三甲医院	中型	中部	<1h	否	是	是	否	是	否	直播	主要看中国队比赛	只看决赛/关键场次	调班排版	偶尔	与家人	否	3	3	3	6	10	6	22
55	无倦怠		35-39岁	主治医师	>5年	71-80h	5-8次	非三甲医院	中型	东部	1-3h	是	是	否	否	否	否	直播	主要看中国队比赛	只看决赛/关键场次	无安排	偶尔	与家人	否	3	4	4	7	3	3	13
56	有倦怠	中度倦怠	<30岁	住院医师	<2年	61-70h	5-8次	三甲医院	大型	东部	>5h	否	否	否	否	是	否	短视频片段	偶尔看看	只看决赛/关键场次	无安排	偶尔	与同事/朋友	否	3	2	4	9	10	12	31
57	有倦怠	轻度倦怠	30-34岁	住院医师	<2年	50-60h	≤4次	三甲医院	大型	东北	1-3h	是	是	否	是	是	是	直播	主要看中国队比赛	全程跟踪重要比赛	无安排	从不	与同事/朋友	是	4	3	4	9	4	5	18
58	有倦怠	轻度倦怠	35-39岁	副主任医师	>5年	50-60h	≤4次	非三甲医院	中型	东部	<1h	否	否	否	是	否	否	短视频片段	每届都看	通过集锦了解	无安排	偶尔	独自观看	否	3	2	3	6	11	11	28
59	有倦怠	轻度倦怠	≥45岁	主任医师	>5年	50-60h	≤4次	三甲医院	大型	西部	3-5h	是	是	否	否	否	否	直播	每届都看	只看决赛/关键场次	无安排	从不	独自观看	是	4	3	3	9	10	2	21
60	有倦怠	轻度倦怠	≥45岁	副主任医师	>5年	<50h	≤4次	三甲医院	大型	中部	3-5h	是	是	是	否	否	否	直播	主要看中国队比赛	只看决赛/关键场次	无安排	偶尔	独自观看	否	3	3	3	6	10	8	24
61	无倦怠		35-39岁	主任医师	2-5年	61-70h	5-8次	三甲医院	中型	中部	<1h	是	是	否	否	是	否	短视频片段	每届都看	只看决赛/关键场次	无安排	经常	与同事/朋友	是	3	4	3	3	3	6	12
62	有倦怠	轻度倦怠	35-39岁	主治医师	>5年	50-60h	5-8次	三甲医院	小型	西部	3-5h	否	否	否	否	是	否	直播	主要看中国队比赛	只看决赛/关键场次	无安排	经常	球迷组织活动	否	3	4	4	6	10	6	22
63	有倦怠	中度倦怠	35-39岁	主治医师	>5年	>80h	5-8次	非三甲医院	中型	中部	1-3h	否	否	否	否	否	是	短视频片段	基本不看	参与线上讨论	无安排	偶尔	独自观看	否	3	4	3	7	12	13	32
64	有倦怠	中度倦怠	40-44岁	副主任医师	>5年	50-60h	5-8次	非三甲医院	大型	西部	<1h	是	否	否	否	是	否	短视频片段	每届都看	全程跟踪重要比赛	无安排	偶尔	与同事/朋友	否	3	3	3	16	9	7	32
65	有倦怠	中度倦怠	40-44岁	副主任医师	>5年	<50h	≤4次	非三甲医院	中型	西部	1-3h	是	是	否	否	否	否	图文战报	主要看中国队比赛	通过集锦了解	调班排版	偶尔	与同事/朋友	否	3	2	3	11	9	10	30
66	有倦怠	轻度倦怠	30-34岁	主治医师	2-5年	50-60h	5-8次	三甲医院	大型	东部	<1h	否	否	否	否	是	否	直播	偶尔看看	只看决赛/关键场次	调班排版	经常	独自观看	否	3	4	4	5	8	5	18
67	有倦怠	重度倦怠	≥45岁	主治医师	>5年	>80h	5-8次	非三甲医院	中型	东部	1-3h	是	是	是	是	否	否	直播	主要看中国队比赛	只看决赛/关键场次	无安排	偶尔	与家人	否	3	3	3	13	17	18	48
68	有倦怠	中度倦怠	35-39岁	副主任医师	2-5年	50-60h	5-8次	三甲医院	大型	西部	1-3h	是	否	否	否	否	否	短视频片段	每届都看	全程跟踪重要比赛	无安排	经常	与家人	否	3	2	1	6	11	13	30
69	无倦怠		40-44岁	主治医师	>5年	61-70h	5-8次	非三甲医院	小型	西部	<1h	否	是	否	否	否	否	直播	每届都看	只看决赛/关键场次	无安排	偶尔	与同事/朋友	是	3	3	4	3	4	1	8
70	无倦怠		40-44岁	副主任医师	>5年	61-70h	5-8次	非三甲医院	中型	西部	3-5h	是	是	否	否	是	否	直播	基本不看	只看决赛/关键场次	无安排	偶尔	独自观看	是	3	3	3	4	6	2	12
71	有倦怠	轻度倦怠	<30岁	住院医师	2-5年	61-70h	≥9次	三甲医院	大型	西部	3-5h	是	是	是	是	否	否	短视频片段	基本不看	全程跟踪重要比赛	无安排	偶尔	独自观看	否	3	3	2	7	10	5	22
72	有倦怠	中度倦怠	30-34岁	副主任医师	>5年	50-60h	5-8次	三甲医院	大型	东部	<1h	否	否	是	否	是	否	短视频片段	主要看中国队比赛	全程跟踪重要比赛	无安排	从不	球迷组织活动	否	2	2	3	5	14	11	30
73	有倦怠	轻度倦怠	<30岁	住院医师	<2年	71-80h	≥9次	三甲医院	小型	东北	<1h	是	是	否	否	否	否	图文战报	主要看中国队比赛	全程跟踪重要比赛	无安排	偶尔	独自观看	否	4	3	4	11	11	5	27
74	有倦怠	轻度倦怠	30-34岁	主治医师	2-5年	71-80h	≥9次	非三甲医院	小型	西部	3-5h	是	是	否	否	否	否	直播	每届都看	只看决赛/关键场次	调班排版	偶尔	独自观看	是	3	2	4	11	11	6	28
75	无倦怠		30-34岁	住院医师	<2年	61-70h	≥9次	非三甲医院	小型	西部	<1h	否	是	是	否	是	否	直播	每届都看	全程跟踪重要比赛	休息区播放	偶尔	独自观看	是	3	2	3	4	3	6	13
76	有倦怠	轻度倦怠	<30岁	住院医师	<2年	71-80h	≥9次	三甲医院	大型	东部	<1h	否	是	否	否	是	是	图文战报	每届都看	只看决赛/关键场次	无安排	偶尔	与同事/朋友	否	3	3	4	7	6	2	15
77	无倦怠		40-44岁	副主任医师	>5年	71-80h	5-8次	非三甲医院	中型	西部	3-5h	是	是	是	否	是	否	现场/公共场所	主要看中国队比赛	只看决赛/关键场次	无安排	偶尔	与家人	否	2	3	2	4	3	5	12
78	有倦怠	轻度倦怠	35-39岁	主治医师	>5年	61-70h	5-8次	三甲医院	大型	中部	1-3h	是	是	是	是	否	否	直播	每届都看	只看决赛/关键场次	休息区播放	偶尔	与同事/朋友	否	2	2	3	6	9	10	25
79	有倦怠	轻度倦怠	35-39岁	主治医师	>5年	50-60h	≤4次	非三甲医院	小型	中部	>5h	否	否	否	是	是	否	短视频片段	主要看中国队比赛	全程跟踪重要比赛	无安排	偶尔	独自观看	是	4	2	2	6	8	12	26
80	有倦怠	重度倦怠	40-44岁	主治医师	>5年	>80h	≤4次	三甲医院	大型	东部	<1h	否	是	否	否	否	否	直播	主要看中国队比赛	只看决赛/关键场次	无安排	偶尔	球迷组织活动	否	2	3	3	18	12	16	46
81	有倦怠	轻度倦怠	40-44岁	副主任医师	>5年	50-60h	5-8次	三甲医院	大型	西部	>5h	否	是	否	否	是	否	直播	每届都看	只看决赛/关键场次	无安排	偶尔	独自观看	否	3	4	3	5	10	11	26
82	有倦怠	轻度倦怠	40-44岁	副主任医师	>5年	50-60h	≥9次	三甲医院	中型	中部	3-5h	否	是	否	否	是	否	图文战报	主要看中国队比赛	全程跟踪重要比赛	无安排	经常	独自观看	否	3	2	3	7	6	12	25
83	无倦怠		<30岁	住院医师	2-5年	50-60h	5-8次	非三甲医院	中型	东北	<1h	是	是	否	否	否	否	图文战报	每届都看	只看决赛/关键场次	休息区播放	从不	与同事/朋友	是	3	3	3	5	3	5	13
84	有倦怠	轻度倦怠	30-34岁	主治医师	2-5年	50-60h	≥9次	非三甲医院	中型	中部	<1h	是	否	否	否	否	否	直播	每届都看	只看决赛/关键场次	休息区播放	偶尔	独自观看	否	3	3	3	7	10	10	27
85	有倦怠	轻度倦怠	30-34岁	住院医师	2-5年	50-60h	≤4次	三甲医院	小型	西部	3-5h	否	否	是	否	是	否	直播	偶尔看看	只看决赛/关键场次	休息区播放	经常	独自观看	否	3	3	3	6	4	7	17
86	有倦怠	轻度倦怠	35-39岁	主治医师	>5年	50-60h	5-8次	三甲医院	大型	西部	1-3h	是	是	否	是	否	否	直播	每届都看	参与线上讨论	无安排	偶尔	与同事/朋友	否	3	3	3	7	6	5	18
87	有倦怠	轻度倦怠	35-39岁	主治医师	>5年	50-60h	≤4次	非三甲医院	中型	东部	1-3h	是	是	是	否	否	否	短视频片段	主要看中国队比赛	全程跟踪重要比赛	无安排	偶尔	与同事/朋友	否	4	2	3	9	9	8	26
88	无倦怠		<30岁	住院医师	<2年	50-60h	≤4次	非三甲医院	小型	西部	3-5h	否	否	否	否	否	是	短视频片段	每届都看	全程跟踪重要比赛	无安排	偶尔	与同事/朋友	是	3	3	4	5	3	6	14
89	有倦怠	重度倦怠	40-44岁	副主任医师	>5年	61-70h	≥9次	三甲医院	大型	西部	<1h	否	是	否	是	否	否	短视频片段	主要看中国队比赛	参与线上讨论	无安排	偶尔	独自观看	是	2	3	3	13	16	15	44
90	有倦怠	重度倦怠	30-34岁	主治医师	2-5年	50-60h	≤4次	三甲医院	小型	东北	<1h	否	否	否	否	是	否	短视频片段	主要看中国队比赛	通过集锦了解	无安排	偶尔	独自观看	否	3	3	3	14	15	13	42
91	有倦怠	轻度倦怠	<30岁	住院医师	<2年	50-60h	5-8次	三甲医院	大型	西部	1-3h	是	是	否	否	是	否	短视频片段	每届都看	参与线上讨论	无安排	偶尔	独自观看	否	2	3	3	8	7	13	28
92	有倦怠	中度倦怠	30-34岁	副主任医师	>5年	71-80h	≥9次	三甲医院	小型	西部	<1h	否	是	否	否	否	否	短视频片段	每届都看	参与线上讨论	调班排版	偶尔	与家人	否	4	2	4	9	14	6	29
93	有倦怠	轻度倦怠	<30岁	住院医师	<2年	61-70h	5-8次	三甲医院	中型	东部	<1h	是	是	是	否	否	否	短视频片段	主要看中国队比赛	参与线上讨论	无安排	偶尔	与家人	否	2	2	3	4	6	5	15
94	有倦怠	轻度倦怠	35-39岁	主治医师	>5年	50-60h	5-8次	非三甲医院	小型	西部	3-5h	否	否	否	否	否	是	直播	主要看中国队比赛	通过集锦了解	无安排	偶尔	独自观看	是	3	3	2	6	9	10	25
95	有倦怠	轻度倦怠	30-34岁	主治医师	>5年	71-80h	≥9次	三甲医院	大型	西部	1-3h	否	是	是	否	是	否	短视频片段	每届都看	只看决赛/关键场次	无安排	偶尔	独自观看	否	2	3	2	5	7	12	24
96	有倦怠	轻度倦怠	40-44岁	主任医师	>5年	71-80h	5-8次	三甲医院	小型	西部	3-5h	是	是	否	是	是	否	短视频片段	主要看中国队比赛	只看决赛/关键场次	调班排版	偶尔	与同事/朋友	是	3	3	3	9	6	13	28
97	有倦怠	轻度倦怠	30-34岁	主治医师	2-5年	<50h	≤4次	非三甲医院	小型	中部	3-5h	否	是	否	是	否	否	直播	每届都看	只看决赛/关键场次	无安排	经常	独自观看	否	3	3	4	6	14	8	28
98	有倦怠	中度倦怠	<30岁	住院医师	<2年	>80h	≥9次	非三甲医院	小型	中部	<1h	是	否	否	否	是	否	现场/公共场所	每届都看	全程跟踪重要比赛	调班排版	偶尔	与同事/朋友	否	3	3	3	19	8	5	32
99	无倦怠		<30岁	住院医师	<2年	50-60h	5-8次	三甲医院	大型	西部	3-5h	是	是	否	否	否	是	直播	每届都看	全程跟踪重要比赛	无安排	偶尔	独自观看	否	2	3	2	4	4	3	11
100	有倦怠	中度倦怠	<30岁	住院医师	<2年	50-60h	5-8次	三甲医院	大型	东部	1-3h	否	否	否	否	否	是	短视频片段	每届都看	只看决赛/关键场次	调班排版	从不	与同事/朋友	否	3	4	3	15	12	5	32
101	有倦怠	重度倦怠	30-34岁	主治医师	2-5年	50-60h	≤4次	三甲医院	大型	东北	<1h	否	是	是	否	是	否	短视频片段	主要看中国队比赛	全程跟踪重要比赛	调班排版	从不	与同事/朋友	否	3	3	4	12	14	16	42
102	无倦怠		30-34岁	住院医师	2-5年	71-80h	5-8次	三甲医院	小型	西部	1-3h	是	否	否	否	否	否	短视频片段	每届都看	只看决赛/关键场次	休息区播放	偶尔	与同事/朋友	是	3	3	4	4	5	3	12
103	有倦怠	轻度倦怠	30-34岁	主治医师	2-5年	>80h	≥9次	非三甲医院	中型	东部	3-5h	否	否	否	否	是	否	直播	每届都看	全程跟踪重要比赛	无安排	偶尔	独自观看	否	2	2	3	10	4	14	28
104	有倦怠	重度倦怠	35-39岁	主治医师	>5年	50-60h	≤4次	三甲医院	小型	东部	1-3h	否	否	否	否	是	否	直播	主要看中国队比赛	通过集锦了解	无安排	偶尔	独自观看	否	3	3	3	15	13	15	43
105	有倦怠	重度倦怠	35-39岁	主治医师	>5年	61-70h	≤4次	非三甲医院	中型	东部	<1h	否	否	否	否	否	是	短视频片段	每届都看	全程跟踪重要比赛	无安排	从不	独自观看	否	3	3	3	14	14	16	44
106	有倦怠	轻度倦怠	40-44岁	主任医师	>5年	50-60h	5-8次	非三甲医院	小型	东北	<1h	是	是	是	否	否	否	短视频片段	主要看中国队比赛	只看决赛/关键场次	调班排版	偶尔	独自观看	是	3	3	4	4	10	6	20
107	有倦怠	轻度倦怠	35-39岁	主治医师	>5年	71-80h	≥9次	三甲医院	大型	中部	<1h	否	是	否	是	否	否	直播	每届都看	只看决赛/关键场次	无安排	经常	独自观看	是	4	3	3	7	11	8	26
108	有倦怠	重度倦怠	40-44岁	副主任医师	>5年	71-80h	5-8次	三甲医院	大型	东北	<1h	否	否	否	否	否	是	现场/公共场所	每届都看	只看决赛/关键场次	无安排	偶尔	与家人	否	3	2	3	10	20	12	42
109	有倦怠	轻度倦怠	≥45岁	副主任医师	>5年	61-70h	≥9次	非三甲医院	小型	东部	<1h	否	否	否	否	是	否	直播	每届都看	只看决赛/关键场次	无安排	偶尔	独自观看	否	3	4	3	9	7	11	27
110	无倦怠		40-44岁	副主任医师	>5年	50-60h	5-8次	三甲医院	大型	西部	3-5h	否	是	否	否	否	否	直播	每届都看	只看决赛/关键场次	无安排	从不	与家人	是	3	4	2	4	3	6	13
111	有倦怠	轻度倦怠	<30岁	住院医师	2-5年	>80h	5-8次	非三甲医院	小型	中部	1-3h	是	否	否	否	是	是	短视频片段	主要看中国队比赛	只看决赛/关键场次	无安排	偶尔	与家人	是	3	3	3	9	9	5	23
112	有倦怠	中度倦怠	30-34岁	主治医师	2-5年	50-60h	≤4次	非三甲医院	小型	中部	3-5h	否	否	否	是	否	否	直播	偶尔看看	通过集锦了解	无安排	经常	独自观看	否	2	3	2	19	8	10	37
113	有倦怠	轻度倦怠	30-34岁	住院医师	2-5年	50-60h	5-8次	非三甲医院	小型	东北	3-5h	是	是	否	否	是	否	直播	每届都看	只看决赛/关键场次	无安排	偶尔	独自观看	否	3	2	4	6	8	6	20
114	有倦怠	轻度倦怠	40-44岁	主任医师	>5年	<50h	≤4次	三甲医院	大型	中部	>5h	否	否	是	否	是	否	图文战报	每届都看	通过集锦了解	无安排	偶尔	独自观看	否	4	3	3	7	8	10	25
115	有倦怠	中度倦怠	35-39岁	主治医师	>5年	50-60h	≤4次	三甲医院	小型	东部	<1h	否	否	否	否	是	否	直播	每届都看	只看决赛/关键场次	无安排	经常	球迷组织活动	否	3	3	4	11	14	6	31
116	有倦怠	轻度倦怠	30-34岁	主治医师	2-5年	50-60h	5-8次	三甲医院	大型	中部	3-5h	否	否	否	否	否	是	短视频片段	每届都看	只看决赛/关键场次	无安排	偶尔	独自观看	否	3	3	4	9	11	5	25
117	有倦怠	轻度倦怠	40-44岁	副主任医师	>5年	61-70h	≥9次	三甲医院	大型	西部	1-3h	否	否	否	否	是	否	短视频片段	偶尔看看	通过集锦了解	无安排	偶尔	与同事/朋友	否	3	3	3	6	10	6	22
118	有倦怠	轻度倦怠	30-34岁	主治医师	2-5年	>80h	5-8次	三甲医院	大型	中部	1-3h	是	否	是	否	否	否	直播	每届都看	参与线上讨论	无安排	偶尔	独自观看	否	3	3	4	14	7	6	27
119	有倦怠	中度倦怠	<30岁	住院医师	<2年	50-60h	5-8次	三甲医院	大型	东部	3-5h	否	否	否	否	否	是	图文战报	每届都看	参与线上讨论	无安排	偶尔	与家人	否	3	3	2	16	8	10	34
120	无倦怠		30-34岁	住院医师	<2年	50-60h	≤4次	三甲医院	大型	西部	<1h	是	是	是	否	否	否	直播	主要看中国队比赛	通过集锦了解	无安排	经常	独自观看	是	2	2	3	7	4	2	13
121	无倦怠		40-44岁	副主任医师	>5年	50-60h	≤4次	非三甲医院	中型	东部	3-5h	否	是	否	否	否	否	直播	主要看中国队比赛	只看决赛/关键场次	无安排	经常	独自观看	否	3	4	3	4	6	4	14
122	无倦怠		40-44岁	副主任医师	>5年	<50h	≤4次	三甲医院	中型	东北	3-5h	否	否	是	是	否	否	短视频片段	每届都看	全程跟踪重要比赛	无安排	偶尔	与家人	否	3	3	3	4	4	6	14
123	无倦怠		35-39岁	主治医师	2-5年	>80h	5-8次	三甲医院	小型	东北	>5h	是	是	否	否	是	否	直播	主要看中国队比赛	全程跟踪重要比赛	无安排	从不	独自观看	否	4	3	4	4	8	2	14
124	有倦怠	中度倦怠	30-34岁	主治医师	2-5年	50-60h	5-8次	三甲医院	大型	东北	<1h	是	否	否	是	否	是	直播	主要看中国队比赛	参与线上讨论	无安排	从不	与家人	是	2	3	2	12	9	11	32
125	无倦怠		<30岁	住院医师	<2年	50-60h	≤4次	三甲医院	小型	中部	3-5h	否	否	是	是	否	否	短视频片段	主要看中国队比赛	全程跟踪重要比赛	无安排	经常	与同事/朋友	否	4	2	3	5	4	4	13
126	有倦怠	中度倦怠	<30岁	住院医师	<2年	61-70h	5-8次	非三甲医院	小型	西部	1-3h	是	否	是	否	否	否	直播	主要看中国队比赛	全程跟踪重要比赛	休息区播放	偶尔	独自观看	否	4	3	4	12	7	12	31
127	有倦怠	重度倦怠	40-44岁	主治医师	>5年	>80h	5-8次	非三甲医院	中型	东北	>5h	是	是	否	否	否	否	直播	每届都看	只看决赛/关键场次	无安排	偶尔	与家人	是	3	2	3	17	13	12	42
128	有倦怠	中度倦怠	30-34岁	主治医师	2-5年	50-60h	≤4次	三甲医院	大型	中部	1-3h	是	否	否	是	否	否	短视频片段	每届都看	只看决赛/关键场次	无安排	偶尔	独自观看	否	2	3	2	13	7	14	34
129	有倦怠	轻度倦怠	≥45岁	主任医师	>5年	50-60h	5-8次	三甲医院	大型	东北	>5h	否	是	否	否	否	否	直播	每届都看	只看决赛/关键场次	无安排	从不	与家人	否	3	3	3	12	5	8	25
130	有倦怠	重度倦怠	30-34岁	主治医师	2-5年	50-60h	5-8次	三甲医院	大型	东部	<1h	否	否	否	否	否	是	短视频片段	主要看中国队比赛	只看决赛/关键场次	无安排	从不	独自观看	否	3	4	3	15	13	15	43
131	无倦怠		30-34岁	住院医师	2-5年	61-70h	≥9次	非三甲医院	中型	中部	3-5h	是	是	否	否	否	是	短视频片段	每届都看	只看决赛/关键场次	无安排	从不	独自观看	是	3	3	3	5	3	6	14
132	有倦怠	中度倦怠	30-34岁	主治医师	2-5年	50-60h	≤4次	非三甲医院	大型	西部	<1h	是	否	否	否	否	否	短视频片段	每届都看	只看决赛/关键场次	无安排	从不	独自观看	是	3	3	4	13	9	9	31
133	无倦怠		40-44岁	主任医师	>5年	50-60h	5-8次	三甲医院	大型	中部	1-3h	是	否	是	否	是	否	短视频片段	每届都看	通过集锦了解	无安排	偶尔	与同事/朋友	否	2	3	2	3	3	6	12
134	无倦怠		30-34岁	住院医师	2-5年	50-60h	≥9次	三甲医院	大型	东北	1-3h	否	否	否	否	否	是	直播	每届都看	只看决赛/关键场次	无安排	偶尔	与同事/朋友	是	3	2	4	3	5	5	13
135	有倦怠	轻度倦怠	35-39岁	主治医师	>5年	50-60h	5-8次	三甲医院	大型	西部	1-3h	是	是	是	否	否	否	直播	主要看中国队比赛	只看决赛/关键场次	无安排	偶尔	球迷组织活动	是	3	3	3	9	8	6	23
136	有倦怠	中度倦怠	≥45岁	主任医师	>5年	50-60h	5-8次	三甲医院	大型	西部	1-3h	是	否	否	否	否	否	短视频片段	主要看中国队比赛	只看决赛/关键场次	无安排	经常	独自观看	否	3	3	2	10	11	9	30
137	无倦怠		35-39岁	主治医师	>5年	61-70h	5-8次	三甲医院	小型	中部	3-5h	否	否	否	否	否	是	短视频片段	每届都看	参与线上讨论	无安排	偶尔	独自观看	否	3	3	3	6	6	1	13
138	有倦怠	轻度倦怠	≥45岁	主治医师	>5年	50-60h	≤4次	三甲医院	大型	东北	1-3h	否	否	是	否	否	否	短视频片段	主要看中国队比赛	参与线上讨论	无安排	偶尔	与同事/朋友	是	3	3	3	7	12	6	25
139	有倦怠	轻度倦怠	30-34岁	主治医师	2-5年	>80h	≥9次	三甲医院	大型	东部	3-5h	否	否	否	否	否	是	图文战报	主要看中国队比赛	只看决赛/关键场次	无安排	偶尔	独自观看	否	4	4	4	7	12	5	24
140	有倦怠	中度倦怠	35-39岁	副主任医师	2-5年	>80h	≥9次	非三甲医院	小型	中部	<1h	否	是	否	否	否	否	短视频片段	每届都看	只看决赛/关键场次	无安排	经常	独自观看	否	3	3	3	11	5	14	30
141	有倦怠	轻度倦怠	40-44岁	副主任医师	>5年	50-60h	≤4次	三甲医院	小型	中部	<1h	是	否	否	否	是	否	短视频片段	偶尔看看	只看决赛/关键场次	休息区播放	偶尔	与同事/朋友	否	3	3	3	6	4	12	22
142	有倦怠	中度倦怠	≥45岁	主治医师	>5年	50-60h	5-8次	三甲医院	大型	中部	1-3h	是	否	是	否	否	否	短视频片段	偶尔看看	全程跟踪重要比赛	无安排	偶尔	独自观看	否	3	4	3	14	10	11	35
143	有倦怠	轻度倦怠	30-34岁	主治医师	>5年	>80h	5-8次	三甲医院	大型	东部	<1h	否	否	否	否	否	是	直播	每届都看	只看决赛/关键场次	调班排版	偶尔	独自观看	否	3	3	3	11	7	7	25
144	有倦怠	轻度倦怠	<30岁	住院医师	<2年	>80h	5-8次	非三甲医院	小型	东北	3-5h	否	是	否	是	否	否	短视频片段	基本不看	全程跟踪重要比赛	无安排	偶尔	球迷组织活动	否	3	4	3	9	10	3	22
145	无倦怠		40-44岁	主任医师	>5年	50-60h	5-8次	三甲医院	大型	中部	3-5h	否	是	否	否	否	否	现场/公共场所	主要看中国队比赛	只看决赛/关键场次	无安排	偶尔	独自观看	否	3	3	3	6	5	2	13
146	有倦怠	中度倦怠	≥45岁	主任医师	>5年	50-60h	5-8次	非三甲医院	中型	西部	<1h	否	否	否	否	否	是	短视频片段	每届都看	只看决赛/关键场次	无安排	偶尔	与同事/朋友	否	3	2	2	12	7	10	29
147	有倦怠	重度倦怠	≥45岁	主任医师	>5年	71-80h	≥9次	非三甲医院	小型	东部	1-3h	否	否	是	否	否	否	直播	基本不看	全程跟踪重要比赛	调班排版	从不	独自观看	否	2	3	3	18	11	15	44
148	有倦怠	中度倦怠	30-34岁	主治医师	2-5年	<50h	≤4次	三甲医院	大型	中部	1-3h	是	是	是	否	否	否	短视频片段	主要看中国队比赛	只看决赛/关键场次	休息区播放	从不	与家人	否	3	3	2	9	6	16	31
149	有倦怠	轻度倦怠	40-44岁	副主任医师	>5年	61-70h	5-8次	三甲医院	大型	东部	<1h	否	否	否	是	是	否	现场/公共场所	每届都看	只看决赛/关键场次	无安排	经常	与同事/朋友	是	3	3	3	8	9	8	25
150	无倦怠		<30岁	住院医师	<2年	50-60h	≤4次	非三甲医院	小型	西部	3-5h	是	是	否	否	是	否	短视频片段	偶尔看看	参与线上讨论	无安排	偶尔	独自观看	否	2	3	3	7	4	2	13
151	无倦怠		35-39岁	主治医师	2-5年	50-60h	5-8次	三甲医院	大型	东北	>5h	否	是	是	是	是	否	直播	主要看中国队比赛	只看决赛/关键场次	无安排	偶尔	独自观看	是	2	3	3	4	4	6	14
152	有倦怠	中度倦怠	≥45岁	主任医师	>5年	>80h	5-8次	非三甲医院	大型	东北	<1h	是	是	是	是	否	否	短视频片段	每届都看	全程跟踪重要比赛	无安排	从不	独自观看	否	3	3	4	11	11	8	30
153	无倦怠		<30岁	住院医师	2-5年	61-70h	≥9次	三甲医院	大型	东北	1-3h	否	是	否	否	否	否	直播	偶尔看看	全程跟踪重要比赛	无安排	偶尔	与同事/朋友	否	3	2	3	3	6	5	14
154	有倦怠	轻度倦怠	30-34岁	住院医师	<2年	61-70h	5-8次	三甲医院	大型	中部	<1h	是	否	否	是	否	否	图文战报	偶尔看看	参与线上讨论	无安排	偶尔	独自观看	否	3	3	3	8	7	3	18
155	无倦怠		30-34岁	主治医师	2-5年	61-70h	5-8次	三甲医院	小型	中部	<1h	是	是	否	否	是	否	直播	主要看中国队比赛	只看决赛/关键场次	无安排	偶尔	与同事/朋友	否	3	3	2	5	3	6	14
156	无倦怠		<30岁	住院医师	<2年	50-60h	5-8次	三甲医院	大型	西部	<1h	是	是	否	否	否	否	图文战报	主要看中国队比赛	只看决赛/关键场次	无安排	偶尔	与同事/朋友	否	3	3	4	4	4	6	14
157	有倦怠	中度倦怠	35-39岁	副主任医师	>5年	50-60h	5-8次	非三甲医院	大型	东部	3-5h	否	否	否	否	否	是	短视频片段	每届都看	只看决赛/关键场次	无安排	经常	独自观看	否	3	3	3	7	12	12	31
158	有倦怠	中度倦怠	35-39岁	主治医师	>5年	50-60h	≤4次	非三甲医院	中型	西部	<1h	否	否	否	否	否	是	图文战报	每届都看	全程跟踪重要比赛	无安排	偶尔	独自观看	否	3	3	3	12	7	12	31
159	无倦怠		35-39岁	副主任医师	>5年	50-60h	≤4次	三甲医院	大型	西部	1-3h	是	是	是	否	否	否	图文战报	每届都看	全程跟踪重要比赛	无安排	从不	与家人	否	3	3	3	4	5	3	12
160	有倦怠	中度倦怠	35-39岁	副主任医师	>5年	71-80h	≥9次	三甲医院	大型	西部	1-3h	否	否	是	是	否	否	直播	主要看中国队比赛	只看决赛/关键场次	无安排	偶尔	与同事/朋友	否	3	4	3	10	11	10	31
161	有倦怠	中度倦怠	40-44岁	副主任医师	>5年	50-60h	5-8次	非三甲医院	小型	东部	3-5h	否	否	否	否	否	是	短视频片段	每届都看	只看决赛/关键场次	无安排	偶尔	独自观看	否	2	3	4	12	11	13	36
162	无倦怠		≥45岁	副主任医师	>5年	50-60h	≤4次	非三甲医院	小型	西部	3-5h	是	是	否	是	是	是	现场/公共场所	主要看中国队比赛	只看决赛/关键场次	调班排版	从不	独自观看	否	2	4	3	4	3	6	13
163	有倦怠	轻度倦怠	<30岁	住院医师	<2年	50-60h	5-8次	三甲医院	大型	西部	3-5h	否	否	否	否	否	是	直播	每届都看	只看决赛/关键场次	调班排版	偶尔	独自观看	否	3	3	3	8	7	6	21
164	无倦怠		40-44岁	副主任医师	>5年	61-70h	5-8次	三甲医院	大型	西部	<1h	否	是	是	否	否	否	直播	每届都看	只看决赛/关键场次	无安排	偶尔	独自观看	否	2	3	3	4	4	3	11
165	有倦怠	轻度倦怠	35-39岁	主治医师	>5年	50-60h	5-8次	非三甲医院	小型	东部	<1h	是	是	否	否	是	否	直播	每届都看	参与线上讨论	无安排	经常	独自观看	否	3	3	4	9	6	10	25
166	有倦怠	中度倦怠	35-39岁	主治医师	>5年	61-70h	5-8次	非三甲医院	中型	东北	3-5h	是	是	是	否	是	否	直播	主要看中国队比赛	全程跟踪重要比赛	无安排	偶尔	独自观看	否	3	3	3	13	12	11	36
167	有倦怠	中度倦怠	40-44岁	副主任医师	>5年	50-60h	5-8次	三甲医院	大型	中部	<1h	否	否	是	否	否	否	短视频片段	每届都看	只看决赛/关键场次	无安排	偶尔	与同事/朋友	否	3	4	3	10	8	14	32
168	无倦怠		40-44岁	主治医师	>5年	71-80h	5-8次	非三甲医院	中型	西部	>5h	是	否	否	否	否	否	直播	主要看中国队比赛	只看决赛/关键场次	休息区播放	偶尔	独自观看	否	3	3	3	4	3	6	13
169	有倦怠	中度倦怠	≥45岁	副主任医师	>5年	50-60h	5-8次	三甲医院	大型	中部	<1h	否	是	是	否	否	否	图文战报	每届都看	参与线上讨论	无安排	经常	独自观看	否	3	3	3	12	9	10	31
170	有倦怠	中度倦怠	30-34岁	主治医师	2-5年	71-80h	≥9次	非三甲医院	小型	东部	1-3h	否	是	否	否	是	否	短视频片段	主要看中国队比赛	只看决赛/关键场次	无安排	偶尔	与同事/朋友	是	3	3	4	11	9	12	32
171	有倦怠	轻度倦怠	35-39岁	主治医师	2-5年	<50h	≤4次	三甲医院	大型	东部	3-5h	否	否	是	否	是	否	直播	主要看中国队比赛	全程跟踪重要比赛	无安排	从不	独自观看	否	2	4	3	8	9	11	28
172	有倦怠	轻度倦怠	40-44岁	副主任医师	>5年	71-80h	≥9次	三甲医院	大型	东北	1-3h	否	否	否	否	否	是	图文战报	主要看中国队比赛	参与线上讨论	无安排	经常	独自观看	否	3	3	2	7	8	10	25
173	有倦怠	轻度倦怠	40-44岁	主治医师	>5年	50-60h	≥9次	非三甲医院	中型	东部	<1h	否	否	否	是	否	否	直播	主要看中国队比赛	只看决赛/关键场次	无安排	偶尔	独自观看	是	3	3	3	5	11	10	26
174	有倦怠	重度倦怠	≥45岁	主治医师	>5年	71-80h	≥9次	三甲医院	大型	西部	<1h	否	否	否	否	否	是	图文战报	每届都看	只看决赛/关键场次	无安排	偶尔	球迷组织活动	否	3	3	3	16	11	18	45
175	无倦怠		30-34岁	住院医师	<2年	50-60h	5-8次	非三甲医院	中型	西部	>5h	是	是	否	否	否	否	图文战报	主要看中国队比赛	只看决赛/关键场次	无安排	偶尔	与家人	否	3	3	3	5	3	5	13
176	有倦怠	重度倦怠	30-34岁	主治医师	2-5年	<50h	≤4次	三甲医院	小型	西部	<1h	否	是	否	否	否	否	直播	每届都看	只看决赛/关键场次	无安排	偶尔	独自观看	否	4	3	4	14	14	14	42
177	有倦怠	轻度倦怠	<30岁	住院医师	<2年	50-60h	5-8次	非三甲医院	中型	西部	>5h	是	是	否	否	否	否	直播	每届都看	参与线上讨论	调班排版	经常	独自观看	否	3	4	3	4	8	5	17
178	有倦怠	轻度倦怠	35-39岁	主治医师	>5年	50-60h	≤4次	非三甲医院	中型	东部	1-3h	是	是	是	否	是	否	直播	每届都看	全程跟踪重要比赛	无安排	偶尔	与同事/朋友	否	4	3	3	7	6	6	19
179	有倦怠	中度倦怠	35-39岁	主治医师	>5年	50-60h	≤4次	三甲医院	大型	东部	<1h	否	是	否	否	是	否	直播	每届都看	全程跟踪重要比赛	无安排	从不	与同事/朋友	否	3	4	4	14	13	13	40
180	无倦怠		<30岁	住院医师	<2年	50-60h	5-8次	三甲医院	大型	西部	3-5h	是	是	否	否	否	否	直播	主要看中国队比赛	只看决赛/关键场次	无安排	从不	与家人	是	3	4	3	4	4	3	11
181	无倦怠		35-39岁	主治医师	>5年	50-60h	≤4次	三甲医院	大型	西部	3-5h	是	是	是	否	是	否	短视频片段	每届都看	全程跟踪重要比赛	无安排	偶尔	与家人	否	3	3	4	5	3	5	13
182	无倦怠		35-39岁	主任医师	2-5年	50-60h	5-8次	三甲医院	大型	中部	1-3h	是	是	是	否	否	否	短视频片段	每届都看	全程跟踪重要比赛	无安排	偶尔	与同事/朋友	否	4	3	3	6	3	1	10
183	无倦怠		40-44岁	副主任医师	>5年	50-60h	≥9次	非三甲医院	中型	西部	3-5h	是	是	否	是	是	否	直播	每届都看	通过集锦了解	无安排	从不	独自观看	否	3	3	4	4	5	3	12
184	有倦怠	轻度倦怠	<30岁	住院医师	<2年	50-60h	5-8次	非三甲医院	小型	西部	3-5h	否	否	否	否	否	是	现场/公共场所	主要看中国队比赛	全程跟踪重要比赛	无安排	从不	独自观看	否	3	3	2	5	6	6	17
185	无倦怠		30-34岁	住院医师	2-5年	71-80h	5-8次	三甲医院	大型	中部	3-5h	否	否	否	是	否	否	直播	每届都看	只看决赛/关键场次	无安排	经常	独自观看	否	3	3	2	6	3	5	14
186	有倦怠	中度倦怠	40-44岁	副主任医师	>5年	61-70h	5-8次	三甲医院	大型	中部	<1h	否	是	否	否	否	否	短视频片段	主要看中国队比赛	只看决赛/关键场次	无安排	偶尔	与同事/朋友	否	3	3	3	4	15	13	32
187	无倦怠		35-39岁	副主任医师	2-5年	50-60h	≥9次	非三甲医院	中型	东北	>5h	否	否	否	否	否	是	短视频片段	每届都看	参与线上讨论	无安排	从不	独自观看	否	2	2	3	5	6	3	14
188	无倦怠		35-39岁	主治医师	>5年	50-60h	5-8次	三甲医院	大型	中部	3-5h	否	是	否	否	否	是	直播	偶尔看看	全程跟踪重要比赛	调班排版	从不	与同事/朋友	否	3	3	3	5	6	3	14
189	有倦怠	轻度倦怠	40-44岁	副主任医师	>5年	61-70h	5-8次	非三甲医院	小型	西部	1-3h	否	否	否	是	是	否	图文战报	每届都看	参与线上讨论	无安排	偶尔	独自观看	否	3	3	3	10	7	10	27
190	有倦怠	重度倦怠	≥45岁	主任医师	>5年	71-80h	5-8次	三甲医院	大型	西部	3-5h	是	否	否	否	否	否	直播	每届都看	全程跟踪重要比赛	无安排	从不	与同事/朋友	否	3	3	3	19	14	14	47
191	无倦怠		35-39岁	副主任医师	>5年	50-60h	≤4次	三甲医院	大型	西部	1-3h	是	是	是	否	否	否	直播	主要看中国队比赛	只看决赛/关键场次	无安排	偶尔	独自观看	否	3	3	2	4	5	3	12
192	有倦怠	轻度倦怠	≥45岁	副主任医师	>5年	61-70h	≥9次	非三甲医院	小型	中部	1-3h	是	否	否	否	否	否	直播	每届都看	全程跟踪重要比赛	无安排	经常	与家人	是	3	3	4	8	3	5	16
193	有倦怠	轻度倦怠	<30岁	住院医师	<2年	61-70h	≥9次	三甲医院	大型	中部	3-5h	否	否	否	是	是	否	图文战报	每届都看	全程跟踪重要比赛	无安排	偶尔	与家人	否	4	3	3	9	8	5	22
194	有倦怠	轻度倦怠	40-44岁	副主任医师	>5年	71-80h	≥9次	非三甲医院	中型	中部	<1h	是	是	否	否	否	是	直播	每届都看	全程跟踪重要比赛	调班排版	偶尔	球迷组织活动	否	3	3	3	10	10	7	27
195	无倦怠		35-39岁	主治医师	2-5年	61-70h	5-8次	三甲医院	大型	中部	<1h	是	是	否	否	否	否	短视频片段	主要看中国队比赛	通过集锦了解	无安排	经常	独自观看	否	2	2	4	4	6	3	13
196	有倦怠	轻度倦怠	35-39岁	主治医师	>5年	50-60h	≤4次	非三甲医院	大型	中部	<1h	是	是	否	否	否	否	直播	主要看中国队比赛	只看决赛/关键场次	无安排	偶尔	独自观看	否	3	2	2	8	7	8	23
197	有倦怠	中度倦怠	35-39岁	主治医师	>5年	61-70h	5-8次	三甲医院	大型	西部	>5h	否	是	否	否	否	否	直播	每届都看	只看决赛/关键场次	无安排	经常	独自观看	否	4	4	3	12	10	7	29
198	有倦怠	中度倦怠	40-44岁	副主任医师	>5年	61-70h	5-8次	非三甲医院	小型	西部	<1h	否	否	否	否	否	是	现场/公共场所	每届都看	参与线上讨论	无安排	偶尔	与家人	是	4	4	3	11	10	11	32
199	有倦怠	轻度倦怠	<30岁	住院医师	2-5年	61-70h	≥9次	三甲医院	大型	东部	1-3h	是	否	否	否	否	是	短视频片段	每届都看	只看决赛/关键场次	休息区播放	偶尔	与同事/朋友	否	4	3	3	8	10	7	25
200	有倦怠	轻度倦怠	35-39岁	主治医师	>5年	50-60h	≥9次	三甲医院	大型	东部	<1h	否	是	否	否	否	否	短视频片段	主要看中国队比赛	全程跟踪重要比赛	无安排	偶尔	独自观看	否	3	4	3	6	9	11	26
201	有倦怠	轻度倦怠	≥45岁	副主任医师	>5年	50-60h	5-8次	非三甲医院	中型	中部	<1h	否	是	是	否	否	是	图文战报	每届都看	全程跟踪重要比赛	无安排	从不	独自观看	否	2	3	3	9	6	7	22
202	无倦怠		40-44岁	主治医师	>5年	50-60h	5-8次	三甲医院	大型	中部	>5h	否	是	是	否	是	否	直播	每届都看	参与线上讨论	调班排版	偶尔	与同事/朋友	否	3	4	3	5	7	2	14
203	无倦怠		40-44岁	主治医师	>5年	50-60h	≥9次	三甲医院	大型	西部	<1h	否	是	否	否	否	否	短视频片段	主要看中国队比赛	只看决赛/关键场次	休息区播放	经常	与同事/朋友	否	3	2	3	3	5	6	14
204	有倦怠	重度倦怠	30-34岁	主治医师	2-5年	71-80h	≥9次	三甲医院	大型	东北	<1h	否	否	否	否	是	否	短视频片段	主要看中国队比赛	只看决赛/关键场次	无安排	偶尔	独自观看	否	3	2	3	11	15	16	42
205	有倦怠	重度倦怠	≥45岁	主任医师	>5年	71-80h	≤4次	非三甲医院	小型	东部	1-3h	否	否	否	否	否	是	短视频片段	每届都看	全程跟踪重要比赛	休息区播放	偶尔	球迷组织活动	否	3	2	3	12	14	16	42
206	有倦怠	中度倦怠	40-44岁	副主任医师	>5年	<50h	≤4次	三甲医院	大型	东部	<1h	否	是	否	否	是	否	短视频片段	每届都看	通过集锦了解	无安排	偶尔	与同事/朋友	是	3	3	3	13	10	9	32
207	有倦怠	中度倦怠	35-39岁	主治医师	>5年	50-60h	5-8次	三甲医院	大型	西部	<1h	是	是	否	是	是	否	短视频片段	主要看中国队比赛	只看决赛/关键场次	无安排	从不	与同事/朋友	否	3	3	3	12	11	10	33
208	有倦怠	中度倦怠	30-34岁	主治医师	>5年	50-60h	≤4次	非三甲医院	中型	西部	1-3h	否	否	否	是	否	否	现场/公共场所	主要看中国队比赛	只看决赛/关键场次	无安排	经常	独自观看	否	3	2	3	10	10	11	31
209	有倦怠	轻度倦怠	35-39岁	主治医师	>5年	50-60h	5-8次	三甲医院	大型	西部	3-5h	否	否	是	否	是	否	图文战报	每届都看	参与线上讨论	调班排版	偶尔	与家人	否	4	3	3	11	3	7	21
210	有倦怠	轻度倦怠	30-34岁	主治医师	2-5年	50-60h	5-8次	三甲医院	大型	东部	3-5h	否	否	否	否	是	否	图文战报	每届都看	全程跟踪重要比赛	无安排	偶尔	与同事/朋友	是	3	3	3	7	7	13	27
211	有倦怠	重度倦怠	≥45岁	主治医师	>5年	61-70h	5-8次	非三甲医院	大型	东部	<1h	否	否	否	否	否	是	直播	每届都看	只看决赛/关键场次	无安排	从不	独自观看	否	4	3	3	15	14	13	42
212	无倦怠		40-44岁	副主任医师	>5年	61-70h	5-8次	非三甲医院	中型	中部	3-5h	是	否	否	是	是	是	直播	主要看中国队比赛	只看决赛/关键场次	无安排	经常	与家人	否	3	3	3	4	8	2	14
213	有倦怠	轻度倦怠	30-34岁	主治医师	2-5年	50-60h	≤4次	三甲医院	大型	东部	3-5h	否	是	是	否	否	否	短视频片段	主要看中国队比赛	只看决赛/关键场次	调班排版	从不	独自观看	否	3	3	2	11	7	5	23
214	有倦怠	中度倦怠	40-44岁	主治医师	>5年	50-60h	≤4次	非三甲医院	中型	西部	1-3h	否	是	否	否	否	否	短视频片段	每届都看	通过集锦了解	无安排	经常	与同事/朋友	否	3	3	2	8	12	11	31
215	有倦怠	中度倦怠	35-39岁	主治医师	>5年	50-60h	≤4次	非三甲医院	中型	中部	<1h	是	否	否	是	是	否	直播	每届都看	全程跟踪重要比赛	无安排	偶尔	独自观看	否	2	3	3	12	12	6	30
216	有倦怠	重度倦怠	40-44岁	副主任医师	>5年	>80h	≤4次	非三甲医院	大型	东部	1-3h	否	是	否	是	是	否	直播	偶尔看看	只看决赛/关键场次	无安排	偶尔	与同事/朋友	否	3	3	2	15	16	11	42
217	有倦怠	重度倦怠	40-44岁	副主任医师	>5年	50-60h	5-8次	三甲医院	大型	东部	<1h	否	是	否	否	否	否	图文战报	主要看中国队比赛	只看决赛/关键场次	无安排	经常	球迷组织活动	是	2	2	3	14	14	16	44
218	无倦怠		30-34岁	主治医师	2-5年	61-70h	5-8次	非三甲医院	中型	中部	3-5h	否	是	否	否	否	否	直播	每届都看	只看决赛/关键场次	休息区播放	偶尔	独自观看	是	3	3	3	4	3	6	13
219	有倦怠	轻度倦怠	≥45岁	主任医师	>5年	61-70h	5-8次	非三甲医院	中型	中部	3-5h	是	是	否	否	否	否	短视频片段	主要看中国队比赛	只看决赛/关键场次	调班排版	从不	独自观看	否	3	4	3	6	10	6	22
220	无倦怠		30-34岁	住院医师	2-5年	61-70h	5-8次	三甲医院	大型	中部	3-5h	是	是	是	否	是	否	短视频片段	主要看中国队比赛	全程跟踪重要比赛	休息区播放	偶尔	独自观看	否	3	3	3	4	6	3	13
221	无倦怠		40-44岁	主治医师	>5年	61-70h	5-8次	非三甲医院	中型	西部	>5h	是	否	否	否	否	否	直播	主要看中国队比赛	只看决赛/关键场次	无安排	偶尔	独自观看	否	2	3	3	3	4	2	9
222	无倦怠		30-34岁	主治医师	2-5年	50-60h	≤4次	三甲医院	中型	东北	1-3h	是	否	否	是	是	否	直播	偶尔看看	通过集锦了解	无安排	经常	与同事/朋友	否	3	3	3	4	3	0	7
223	有倦怠	中度倦怠	30-34岁	主治医师	>5年	71-80h	5-8次	非三甲医院	小型	中部	3-5h	否	是	否	否	否	否	直播	基本不看	只看决赛/关键场次	无安排	偶尔	与同事/朋友	否	3	4	4	14	8	10	32
224	无倦怠		35-39岁	副主任医师	2-5年	50-60h	≥9次	三甲医院	大型	中部	3-5h	是	是	是	否	否	是	直播	主要看中国队比赛	只看决赛/关键场次	调班排版	偶尔	与家人	否	3	3	3	3	3	1	7
225	无倦怠		30-34岁	副主任医师	2-5年	50-60h	5-8次	三甲医院	大型	东北	<1h	是	否	否	否	是	否	短视频片段	主要看中国队比赛	通过集锦了解	无安排	经常	与同事/朋友	否	4	3	3	3	4	2	9
226	有倦怠	轻度倦怠	35-39岁	主治医师	>5年	50-60h	≥9次	非三甲医院	中型	东部	<1h	是	是	是	否	否	否	短视频片段	主要看中国队比赛	只看决赛/关键场次	调班排版	偶尔	与同事/朋友	否	4	3	3	6	8	12	26
227	有倦怠	轻度倦怠	40-44岁	副主任医师	>5年	50-60h	≤4次	非三甲医院	小型	西部	1-3h	是	是	否	否	否	否	直播	基本不看	只看决赛/关键场次	无安排	偶尔	与同事/朋友	否	3	4	2	9	5	8	22
228	有倦怠	轻度倦怠	<30岁	住院医师	2-5年	61-70h	≥9次	三甲医院	大型	西部	3-5h	否	是	是	否	否	否	直播	主要看中国队比赛	只看决赛/关键场次	无安排	偶尔	与同事/朋友	是	3	3	3	4	7	15	26
229	有倦怠	中度倦怠	<30岁	住院医师	<2年	>80h	5-8次	三甲医院	小型	中部	<1h	否	否	否	否	否	是	短视频片段	偶尔看看	只看决赛/关键场次	无安排	偶尔	与家人	否	3	2	3	12	11	9	32
230	有倦怠	轻度倦怠	30-34岁	主治医师	2-5年	50-60h	5-8次	三甲医院	大型	西部	>5h	否	否	否	否	否	是	短视频片段	每届都看	全程跟踪重要比赛	无安排	偶尔	独自观看	否	2	2	3	9	8	6	23
231	有倦怠	轻度倦怠	35-39岁	主治医师	>5年	50-60h	≤4次	非三甲医院	小型	西部	1-3h	是	是	否	是	否	否	短视频片段	每届都看	参与线上讨论	无安排	偶尔	与家人	是	3	3	2	10	6	8	24
232	有倦怠	轻度倦怠	30-34岁	住院医师	2-5年	61-70h	5-8次	非三甲医院	大型	中部	<1h	是	是	否	否	否	否	直播	主要看中国队比赛	只看决赛/关键场次	休息区播放	偶尔	球迷组织活动	是	3	3	3	6	4	10	20
233	无倦怠		35-39岁	主治医师	>5年	50-60h	≥9次	三甲医院	大型	西部	3-5h	否	是	是	否	否	否	直播	主要看中国队比赛	全程跟踪重要比赛	无安排	偶尔	与同事/朋友	否	2	3	2	5	3	6	14
234	有倦怠	轻度倦怠	40-44岁	副主任医师	>5年	50-60h	5-8次	三甲医院	大型	西部	3-5h	是	是	否	否	否	否	直播	每届都看	只看决赛/关键场次	无安排	偶尔	与同事/朋友	否	3	3	3	5	13	10	28
235	有倦怠	中度倦怠	35-39岁	主治医师	>5年	50-60h	5-8次	三甲医院	大型	中部	<1h	否	否	否	否	是	否	短视频片段	每届都看	全程跟踪重要比赛	无安排	偶尔	独自观看	否	4	4	3	17	6	10	33
236	有倦怠	中度倦怠	40-44岁	主治医师	>5年	61-70h	5-8次	三甲医院	大型	东北	<1h	是	是	否	否	否	否	直播	主要看中国队比赛	参与线上讨论	无安排	从不	独自观看	否	3	3	3	17	9	6	32
237	有倦怠	重度倦怠	35-39岁	主治医师	>5年	50-60h	5-8次	三甲医院	中型	东部	<1h	否	是	否	否	否	否	图文战报	偶尔看看	全程跟踪重要比赛	无安排	偶尔	与家人	是	3	3	4	16	12	14	42
238	有倦怠	轻度倦怠	40-44岁	主任医师	>5年	61-70h	5-8次	非三甲医院	小型	东北	>5h	否	是	否	否	否	否	直播	主要看中国队比赛	全程跟踪重要比赛	无安排	偶尔	与同事/朋友	否	3	3	3	8	13	7	28
239	无倦怠		30-34岁	主治医师	2-5年	50-60h	5-8次	非三甲医院	小型	东北	<1h	是	是	否	否	否	否	直播	偶尔看看	只看决赛/关键场次	休息区播放	偶尔	球迷组织活动	否	2	3	3	3	3	6	12
240	无倦怠		35-39岁	主治医师	2-5年	61-70h	5-8次	非三甲医院	大型	中部	<1h	是	是	是	否	否	否	直播	主要看中国队比赛	参与线上讨论	无安排	偶尔	与同事/朋友	否	2	3	3	5	5	2	12
241	有倦怠	中度倦怠	30-34岁	主治医师	2-5年	71-80h	5-8次	三甲医院	大型	中部	3-5h	否	否	是	否	否	否	直播	主要看中国队比赛	全程跟踪重要比赛	调班排版	偶尔	独自观看	是	4	3	2	9	12	10	31
242	有倦怠	轻度倦怠	35-39岁	主治医师	>5年	50-60h	≤4次	三甲医院	大型	东部	<1h	是	是	否	是	否	否	短视频片段	主要看中国队比赛	全程跟踪重要比赛	无安排	偶尔	球迷组织活动	否	2	3	4	6	7	11	24
243	无倦怠		≥45岁	副主任医师	>5年	71-80h	5-8次	三甲医院	大型	中部	3-5h	是	是	否	否	否	否	直播	每届都看	只看决赛/关键场次	调班排版	经常	独自观看	否	3	3	3	4	6	3	13
244	无倦怠		40-44岁	副主任医师	>5年	50-60h	5-8次	三甲医院	小型	中部	3-5h	是	是	否	否	否	否	图文战报	每届都看	只看决赛/关键场次	无安排	偶尔	与同事/朋友	否	3	3	2	4	7	3	14
245	有倦怠	轻度倦怠	35-39岁	主治医师	>5年	61-70h	≥9次	三甲医院	大型	中部	<1h	是	是	否	否	是	是	直播	主要看中国队比赛	全程跟踪重要比赛	无安排	偶尔	与家人	是	3	3	3	8	6	8	22
246	无倦怠		<30岁	住院医师	<2年	50-60h	5-8次	非三甲医院	小型	西部	<1h	是	否	否	否	否	否	直播	每届都看	只看决赛/关键场次	无安排	偶尔	独自观看	否	3	3	2	7	3	2	12
247	有倦怠	轻度倦怠	40-44岁	副主任医师	>5年	50-60h	≤4次	三甲医院	大型	东北	3-5h	否	是	是	否	否	否	短视频片段	每届都看	参与线上讨论	无安排	经常	球迷组织活动	否	4	4	3	5	10	5	20
248	无倦怠		<30岁	住院医师	<2年	>80h	5-8次	三甲医院	中型	中部	3-5h	否	否	否	否	否	是	直播	偶尔看看	只看决赛/关键场次	无安排	偶尔	与家人	否	3	3	3	4	6	2	12
249	有倦怠	中度倦怠	30-34岁	主治医师	2-5年	50-60h	≤4次	非三甲医院	中型	东北	3-5h	否	否	否	否	是	否	直播	每届都看	全程跟踪重要比赛	无安排	经常	独自观看	是	3	3	3	10	12	10	32
250	无倦怠		<30岁	住院医师	<2年	50-60h	≤4次	三甲医院	小型	西部	3-5h	否	是	否	是	否	是	短视频片段	每届都看	通过集锦了解	无安排	偶尔	与家人	否	2	3	3	5	3	6	14
251	有倦怠	轻度倦怠	30-34岁	住院医师	2-5年	>80h	5-8次	三甲医院	大型	中部	<1h	是	否	否	否	否	否	短视频片段	每届都看	只看决赛/关键场次	无安排	偶尔	独自观看	否	2	4	3	11	7	3	21
252	有倦怠	轻度倦怠	35-39岁	主治医师	>5年	61-70h	5-8次	三甲医院	大型	西部	>5h	否	是	否	是	否	否	直播	主要看中国队比赛	只看决赛/关键场次	无安排	偶尔	独自观看	是	2	2	3	6	11	10	27
253	有倦怠	重度倦怠	35-39岁	主治医师	>5年	61-70h	5-8次	三甲医院	大型	东部	>5h	否	否	否	是	否	否	短视频片段	每届都看	参与线上讨论	调班排版	偶尔	与家人	否	3	3	3	11	17	15	43
254	无倦怠		40-44岁	副主任医师	>5年	50-60h	5-8次	非三甲医院	中型	西部	1-3h	否	是	否	否	否	否	图文战报	主要看中国队比赛	只看决赛/关键场次	无安排	偶尔	球迷组织活动	否	3	3	3	4	6	4	14
255	无倦怠		<30岁	住院医师	2-5年	50-60h	≤4次	三甲医院	大型	中部	3-5h	是	否	是	否	是	否	短视频片段	主要看中国队比赛	全程跟踪重要比赛	无安排	偶尔	独自观看	是	3	3	2	3	5	5	13
256	无倦怠		35-39岁	主任医师	2-5年	50-60h	≥9次	非三甲医院	小型	中部	3-5h	否	是	否	否	是	否	现场/公共场所	每届都看	只看决赛/关键场次	无安排	偶尔	与家人	否	3	3	2	3	3	0	6
257	有倦怠	轻度倦怠	<30岁	住院医师	<2年	71-80h	≥9次	非三甲医院	小型	中部	>5h	是	是	否	否	否	否	直播	每届都看	只看决赛/关键场次	无安排	偶尔	独自观看	是	3	3	3	6	9	11	26
258	无倦怠		35-39岁	主治医师	>5年	61-70h	5-8次	非三甲医院	中型	东北	<1h	是	是	否	否	是	否	直播	每届都看	只看决赛/关键场次	无安排	经常	与家人	是	3	3	3	5	3	1	9
259	有倦怠	中度倦怠	40-44岁	主治医师	>5年	50-60h	5-8次	三甲医院	大型	中部	1-3h	是	是	否	否	是	否	短视频片段	每届都看	通过集锦了解	无安排	偶尔	独自观看	否	2	3	2	8	11	13	32
260	无倦怠		40-44岁	副主任医师	>5年	<50h	≤4次	三甲医院	中型	东北	3-5h	否	否	是	是	否	否	短视频片段	主要看中国队比赛	只看决赛/关键场次	休息区播放	偶尔	与家人	否	3	3	3	4	4	6	14
261	无倦怠		40-44岁	副主任医师	>5年	50-60h	5-8次	三甲医院	大型	西部	3-5h	是	是	否	否	否	否	直播	偶尔看看	全程跟踪重要比赛	无安排	偶尔	独自观看	否	3	3	4	4	7	3	14
262	无倦怠		<30岁	住院医师	<2年	50-60h	5-8次	非三甲医院	中型	东部	<1h	是	是	否	否	是	否	现场/公共场所	每届都看	只看决赛/关键场次	无安排	偶尔	独自观看	否	4	3	4	4	3	2	9
263	有倦怠	轻度倦怠	30-34岁	住院医师	<2年	50-60h	5-8次	非三甲医院	中型	中部	<1h	否	是	否	否	否	否	直播	每届都看	只看决赛/关键场次	无安排	偶尔	独自观看	否	3	2	3	6	8	6	20
264	有倦怠	重度倦怠	40-44岁	副主任医师	>5年	>80h	5-8次	三甲医院	大型	东部	1-3h	否	是	是	否	是	否	直播	主要看中国队比赛	全程跟踪重要比赛	无安排	从不	与同事/朋友	否	3	3	3	15	13	16	44
265	有倦怠	重度倦怠	35-39岁	主治医师	>5年	71-80h	5-8次	非三甲医院	中型	东部	<1h	否	是	否	否	否	否	短视频片段	每届都看	只看决赛/关键场次	无安排	偶尔	与家人	否	3	3	3	14	19	15	48
266	无倦怠		<30岁	住院医师	2-5年	50-60h	≤4次	非三甲医院	小型	东北	<1h	是	否	否	否	否	否	直播	主要看中国队比赛	只看决赛/关键场次	无安排	从不	独自观看	否	3	3	2	4	5	5	14
267	有倦怠	轻度倦怠	30-34岁	住院医师	2-5年	>80h	≥9次	三甲医院	小型	东部	<1h	否	是	否	否	否	否	直播	每届都看	只看决赛/关键场次	无安排	经常	独自观看	否	3	3	4	4	8	5	17
268	有倦怠	中度倦怠	35-39岁	副主任医师	>5年	50-60h	≤4次	三甲医院	大型	中部	<1h	是	否	否	否	否	否	图文战报	主要看中国队比赛	只看决赛/关键场次	无安排	偶尔	独自观看	否	2	3	3	10	9	13	32
269	有倦怠	重度倦怠	30-34岁	主治医师	2-5年	61-70h	5-8次	非三甲医院	大型	东部	>5h	否	否	否	否	否	是	直播	每届都看	只看决赛/关键场次	无安排	偶尔	球迷组织活动	否	2	2	3	20	17	15	52
270	无倦怠		35-39岁	主任医师	>5年	50-60h	≤4次	三甲医院	大型	西部	3-5h	是	是	否	否	是	否	直播	每届都看	全程跟踪重要比赛	无安排	经常	与同事/朋友	是	3	3	3	7	3	3	13
271	无倦怠		<30岁	住院医师	2-5年	>80h	≥9次	三甲医院	大型	中部	3-5h	是	是	否	否	否	否	直播	主要看中国队比赛	只看决赛/关键场次	无安排	偶尔	与家人	否	3	4	3	5	3	6	14
272	有倦怠	轻度倦怠	35-39岁	主治医师	>5年	>80h	≥9次	非三甲医院	中型	东部	1-3h	是	是	否	否	是	否	现场/公共场所	主要看中国队比赛	全程跟踪重要比赛	无安排	偶尔	独自观看	否	3	3	4	9	11	8	28
273	有倦怠	中度倦怠	<30岁	住院医师	<2年	50-60h	≤4次	三甲医院	中型	西部	1-3h	是	否	否	否	否	否	直播	主要看中国队比赛	全程跟踪重要比赛	无安排	经常	独自观看	否	3	3	3	9	9	12	30
274	有倦怠	中度倦怠	40-44岁	主治医师	>5年	50-60h	≤4次	非三甲医院	小型	西部	1-3h	否	否	否	否	否	是	直播	偶尔看看	只看决赛/关键场次	无安排	偶尔	与同事/朋友	否	3	3	3	8	10	14	32
275	无倦怠		30-34岁	住院医师	>5年	50-60h	≤4次	三甲医院	大型	中部	3-5h	否	是	否	否	否	否	直播	主要看中国队比赛	参与线上讨论	无安排	偶尔	独自观看	否	3	3	3	5	3	2	10
276	无倦怠		≥45岁	主任医师	>5年	50-60h	≤4次	非三甲医院	中型	中部	1-3h	是	是	否	否	否	否	直播	每届都看	参与线上讨论	无安排	从不	与同事/朋友	是	3	3	2	4	3	2	9
277	有倦怠	中度倦怠	30-34岁	住院医师	<2年	50-60h	≤4次	非三甲医院	中型	东部	<1h	否	否	否	否	否	是	直播	每届都看	只看决赛/关键场次	无安排	偶尔	球迷组织活动	否	3	2	4	16	10	5	31
278	无倦怠		30-34岁	住院医师	<2年	50-60h	≤4次	三甲医院	大型	西部	<1h	是	是	是	否	否	否	直播	每届都看	只看决赛/关键场次	调班排版	偶尔	与同事/朋友	否	3	3	3	7	4	2	13
279	有倦怠	中度倦怠	35-39岁	主治医师	>5年	71-80h	≥9次	三甲医院	大型	东北	3-5h	否	是	是	否	否	否	直播	每届都看	只看决赛/关键场次	调班排版	偶尔	独自观看	否	3	2	3	11	13	13	37
280	有倦怠	中度倦怠	40-44岁	主任医师	>5年	71-80h	≥9次	三甲医院	大型	中部	>5h	否	否	是	是	是	否	直播	主要看中国队比赛	只看决赛/关键场次	无安排	从不	与同事/朋友	否	2	3	3	13	8	9	30
281	无倦怠		<30岁	住院医师	2-5年	50-60h	≤4次	三甲医院	大型	西部	3-5h	否	是	否	否	否	否	直播	每届都看	参与线上讨论	调班排版	从不	与同事/朋友	否	4	2	3	4	4	5	13
282	无倦怠		30-34岁	住院医师	<2年	50-60h	5-8次	非三甲医院	大型	中部	3-5h	否	否	是	否	否	否	短视频片段	每届都看	只看决赛/关键场次	无安排	偶尔	与家人	否	3	4	3	4	3	2	9
283	无倦怠		<30岁	住院医师	2-5年	61-70h	≥9次	三甲医院	大型	东北	3-5h	是	是	否	否	是	否	短视频片段	基本不看	参与线上讨论	无安排	经常	独自观看	否	2	2	2	4	3	6	13
284	无倦怠		30-34岁	主治医师	2-5年	50-60h	5-8次	三甲医院	大型	西部	<1h	是	是	否	否	是	否	短视频片段	主要看中国队比赛	只看决赛/关键场次	无安排	偶尔	独自观看	否	3	3	3	5	3	2	10
285	无倦怠		35-39岁	主治医师	>5年	50-60h	5-8次	非三甲医院	大型	东部	3-5h	否	否	否	否	否	是	短视频片段	主要看中国队比赛	只看决赛/关键场次	调班排版	偶尔	与同事/朋友	否	3	3	3	5	6	3	14
286	无倦怠		30-34岁	住院医师	<2年	61-70h	5-8次	三甲医院	大型	西部	3-5h	否	是	否	否	是	否	短视频片段	每届都看	只看决赛/关键场次	无安排	偶尔	与同事/朋友	否	3	3	3	3	3	3	9
287	有倦怠	中度倦怠	40-44岁	副主任医师	>5年	50-60h	5-8次	三甲医院	大型	西部	3-5h	否	否	是	是	否	否	直播	基本不看	全程跟踪重要比赛	无安排	偶尔	独自观看	否	3	2	3	14	12	6	32
288	无倦怠		<30岁	住院医师	<2年	50-60h	5-8次	三甲医院	中型	西部	3-5h	是	是	否	否	否	否	直播	每届都看	只看决赛/关键场次	无安排	经常	与同事/朋友	否	3	3	3	5	3	6	14
289	有倦怠	中度倦怠	30-34岁	主治医师	2-5年	50-60h	5-8次	三甲医院	大型	西部	3-5h	是	是	否	是	否	否	现场/公共场所	每届都看	只看决赛/关键场次	休息区播放	从不	与家人	否	3	3	4	14	7	10	31
290	有倦怠	轻度倦怠	<30岁	住院医师	<2年	61-70h	5-8次	非三甲医院	中型	西部	3-5h	否	是	是	否	否	否	短视频片段	每届都看	全程跟踪重要比赛	无安排	从不	独自观看	否	2	3	3	5	15	8	28
291	有倦怠	中度倦怠	<30岁	住院医师	2-5年	50-60h	5-8次	非三甲医院	中型	东部	3-5h	是	否	否	否	否	否	短视频片段	主要看中国队比赛	全程跟踪重要比赛	调班排版	偶尔	与同事/朋友	否	3	3	2	9	10	13	32
292	无倦怠		≥45岁	主任医师	>5年	50-60h	5-8次	非三甲医院	小型	西部	3-5h	否	否	否	否	否	是	直播	主要看中国队比赛	只看决赛/关键场次	无安排	偶尔	球迷组织活动	否	3	3	4	4	3	6	13
293	有倦怠	轻度倦怠	30-34岁	主治医师	2-5年	50-60h	5-8次	非三甲医院	中型	东北	1-3h	否	是	否	否	否	否	直播	每届都看	全程跟踪重要比赛	无安排	经常	独自观看	是	3	3	3	10	5	10	25
294	无倦怠		40-44岁	副主任医师	>5年	71-80h	5-8次	非三甲医院	小型	东部	<1h	是	是	否	否	是	否	直播	每届都看	通过集锦了解	无安排	偶尔	球迷组织活动	是	3	3	3	5	3	0	8
295	有倦怠	重度倦怠	30-34岁	主治医师	2-5年	61-70h	≤4次	非三甲医院	大型	东部	<1h	否	否	否	否	否	是	短视频片段	每届都看	只看决赛/关键场次	无安排	偶尔	与家人	否	3	4	4	11	16	17	44
296	有倦怠	轻度倦怠	35-39岁	副主任医师	>5年	71-80h	≥9次	三甲医院	中型	西部	3-5h	否	是	否	否	否	否	直播	每届都看	全程跟踪重要比赛	无安排	偶尔	与家人	否	3	3	3	8	11	5	24
297	有倦怠	重度倦怠	35-39岁	主治医师	>5年	50-60h	5-8次	三甲医院	大型	东部	<1h	否	是	是	否	否	否	现场/公共场所	主要看中国队比赛	只看决赛/关键场次	无安排	偶尔	独自观看	否	3	3	3	20	10	14	44
298	无倦怠		35-39岁	主任医师	>5年	61-70h	≥9次	非三甲医院	大型	中部	3-5h	否	否	否	否	否	是	短视频片段	主要看中国队比赛	只看决赛/关键场次	调班排版	偶尔	与同事/朋友	否	3	4	3	7	4	2	13
299	有倦怠	中度倦怠	<30岁	住院医师	<2年	>80h	≥9次	三甲医院	大型	东北	<1h	是	是	否	是	是	否	直播	每届都看	只看决赛/关键场次	无安排	偶尔	独自观看	否	3	3	3	14	11	6	31
300	有倦怠	中度倦怠	40-44岁	副主任医师	>5年	50-60h	5-8次	三甲医院	大型	西部	3-5h	否	否	否	否	否	是	直播	每届都看	只看决赛/关键场次	无安排	偶尔	独自观看	否	3	3	3	10	8	14	32
301	有倦怠	重度倦怠	35-39岁	主治医师	>5年	61-70h	5-8次	非三甲医院	大型	东部	1-3h	否	否	是	是	否	否	直播	主要看中国队比赛	全程跟踪重要比赛	无安排	偶尔	与同事/朋友	否	3	3	3	15	12	18	45
302	无倦怠		40-44岁	副主任医师	>5年	71-80h	≥9次	三甲医院	中型	中部	3-5h	是	否	是	否	是	否	直播	每届都看	只看决赛/关键场次	无安排	偶尔	独自观看	是	3	4	3	3	3	2	8
303	有倦怠	中度倦怠	30-34岁	副主任医师	>5年	61-70h	5-8次	三甲医院	大型	东部	1-3h	是	否	否	否	是	否	直播	每届都看	只看决赛/关键场次	无安排	从不	与家人	否	3	2	2	8	13	9	30
304	有倦怠	中度倦怠	40-44岁	副主任医师	>5年	50-60h	≤4次	非三甲医院	小型	东部	1-3h	是	否	是	否	否	否	短视频片段	主要看中国队比赛	只看决赛/关键场次	无安排	偶尔	独自观看	否	2	3	3	6	11	12	29
305	有倦怠	轻度倦怠	30-34岁	主治医师	2-5年	61-70h	5-8次	非三甲医院	小型	西部	1-3h	否	否	否	否	否	是	直播	主要看中国队比赛	只看决赛/关键场次	无安排	偶尔	独自观看	否	4	3	4	8	5	7	20
306	有倦怠	轻度倦怠	30-34岁	主治医师	>5年	50-60h	5-8次	三甲医院	大型	中部	<1h	是	否	否	否	是	否	直播	每届都看	只看决赛/关键场次	调班排版	偶尔	与同事/朋友	否	4	4	3	11	9	5	25
307	无倦怠		<30岁	住院医师	<2年	>80h	≥9次	三甲医院	大型	中部	3-5h	是	否	否	否	否	否	现场/公共场所	每届都看	只看决赛/关键场次	无安排	偶尔	球迷组织活动	否	4	3	3	5	3	6	14
308	有倦怠	轻度倦怠	30-34岁	主治医师	>5年	>80h	≥9次	三甲医院	大型	东部	<1h	否	是	否	否	否	否	直播	基本不看	只看决赛/关键场次	无安排	偶尔	独自观看	否	3	3	2	13	4	8	25
309	有倦怠	重度倦怠	35-39岁	副主任医师	>5年	>80h	≥9次	非三甲医院	中型	东部	<1h	否	是	否	否	是	否	直播	每届都看	全程跟踪重要比赛	无安排	经常	与家人	否	3	3	3	16	15	14	45
310	有倦怠	轻度倦怠	≥45岁	副主任医师	>5年	50-60h	≤4次	非三甲医院	中型	东北	3-5h	是	是	否	否	否	否	现场/公共场所	每届都看	全程跟踪重要比赛	无安排	从不	独自观看	否	2	2	3	9	4	5	18
311	有倦怠	重度倦怠	30-34岁	主治医师	2-5年	61-70h	5-8次	非三甲医院	中型	东部	<1h	否	否	否	否	是	否	短视频片段	每届都看	全程跟踪重要比赛	无安排	从不	与同事/朋友	是	3	4	3	13	12	17	42
312	无倦怠		35-39岁	主治医师	>5年	50-60h	5-8次	非三甲医院	大型	东部	3-5h	否	否	否	否	否	是	直播	主要看中国队比赛	只看决赛/关键场次	无安排	偶尔	独自观看	否	3	3	3	5	6	3	14
313	有倦怠	轻度倦怠	40-44岁	副主任医师	>5年	50-60h	5-8次	三甲医院	大型	东北	3-5h	是	是	否	否	是	否	直播	每届都看	只看决赛/关键场次	无安排	偶尔	独自观看	否	2	3	3	8	12	5	25
314	有倦怠	轻度倦怠	<30岁	住院医师	<2年	50-60h	5-8次	三甲医院	大型	西部	3-5h	否	是	否	否	是	否	短视频片段	每届都看	只看决赛/关键场次	无安排	偶尔	与家人	否	3	3	3	6	6	5	17
315	有倦怠	轻度倦怠	35-39岁	主治医师	>5年	50-60h	≤4次	三甲医院	大型	中部	>5h	否	是	是	否	是	否	直播	主要看中国队比赛	只看决赛/关键场次	无安排	偶尔	与家人	否	3	3	2	10	7	10	27
316	无倦怠		35-39岁	主治医师	>5年	<50h	≥9次	非三甲医院	小型	东北	<1h	是	是	否	是	否	否	直播	每届都看	通过集锦了解	调班排版	偶尔	独自观看	否	4	2	3	4	4	4	12
317	无倦怠		40-44岁	主任医师	>5年	61-70h	5-8次	三甲医院	大型	中部	3-5h	是	否	否	是	否	否	短视频片段	主要看中国队比赛	只看决赛/关键场次	无安排	偶尔	独自观看	是	3	2	3	3	5	6	14
318	有倦怠	轻度倦怠	30-34岁	主治医师	2-5年	<50h	≤4次	三甲医院	大型	西部	1-3h	是	否	否	否	否	否	直播	主要看中国队比赛	全程跟踪重要比赛	无安排	偶尔	独自观看	否	3	3	3	9	5	11	25
319	无倦怠		<30岁	住院医师	<2年	50-60h	5-8次	三甲医院	大型	东北	1-3h	否	是	否	否	否	否	短视频片段	每届都看	只看决赛/关键场次	无安排	偶尔	独自观看	否	2	3	3	7	3	4	14
320	无倦怠		40-44岁	主任医师	>5年	61-70h	5-8次	三甲医院	大型	中部	3-5h	是	否	否	是	否	否	直播	每届都看	全程跟踪重要比赛	无安排	偶尔	独自观看	否	3	3	3	3	5	6	14
321	有倦怠	轻度倦怠	≥45岁	主任医师	>5年	71-80h	5-8次	三甲医院	小型	东部	<1h	否	否	否	否	否	是	直播	主要看中国队比赛	只看决赛/关键场次	无安排	经常	独自观看	否	3	2	3	13	5	5	23
322	有倦怠	中度倦怠	≥45岁	主任医师	>5年	>80h	5-8次	非三甲医院	小型	东北	3-5h	否	否	否	否	否	是	直播	偶尔看看	通过集锦了解	无安排	偶尔	独自观看	否	3	3	3	9	7	14	30
323	有倦怠	中度倦怠	40-44岁	副主任医师	>5年	71-80h	≥9次	三甲医院	大型	中部	<1h	是	否	否	否	否	否	直播	每届都看	只看决赛/关键场次	无安排	从不	与同事/朋友	否	3	3	3	10	15	13	38
324	有倦怠	中度倦怠	<30岁	住院医师	2-5年	61-70h	5-8次	三甲医院	大型	西部	<1h	否	否	否	否	否	是	现场/公共场所	主要看中国队比赛	全程跟踪重要比赛	无安排	偶尔	与家人	否	3	3	3	10	15	6	31
325	有倦怠	中度倦怠	30-34岁	主治医师	2-5年	61-70h	5-8次	三甲医院	大型	西部	<1h	否	否	否	否	否	是	直播	主要看中国队比赛	全程跟踪重要比赛	无安排	偶尔	与同事/朋友	否	3	3	3	10	12	15	37
326	无倦怠		≥45岁	主任医师	>5年	71-80h	5-8次	三甲医院	大型	东北	<1h	否	否	否	否	是	否	现场/公共场所	基本不看	全程跟踪重要比赛	无安排	从不	与家人	否	3	3	4	5	3	6	14
327	无倦怠		40-44岁	副主任医师	>5年	50-60h	5-8次	非三甲医院	小型	西部	3-5h	否	是	是	否	否	否	直播	每届都看	参与线上讨论	无安排	经常	独自观看	否	3	3	3	3	3	1	7
328	有倦怠	中度倦怠	40-44岁	主任医师	>5年	61-70h	5-8次	三甲医院	大型	中部	<1h	否	否	是	否	是	否	短视频片段	主要看中国队比赛	只看决赛/关键场次	休息区播放	偶尔	独自观看	是	3	2	3	8	13	14	35
329	有倦怠	中度倦怠	<30岁	住院医师	<2年	50-60h	5-8次	三甲医院	大型	中部	>5h	否	是	否	否	是	否	直播	主要看中国队比赛	通过集锦了解	无安排	经常	独自观看	否	2	4	3	14	10	7	31
330	有倦怠	轻度倦怠	<30岁	住院医师	<2年	50-60h	≤4次	三甲医院	小型	西部	3-5h	否	否	否	否	否	是	现场/公共场所	每届都看	参与线上讨论	无安排	偶尔	独自观看	否	3	3	3	4	11	7	22
331	有倦怠	轻度倦怠	35-39岁	主治医师	2-5年	>80h	≥9次	三甲医院	大型	西部	3-5h	是	是	是	否	否	否	短视频片段	主要看中国队比赛	只看决赛/关键场次	无安排	偶尔	与家人	否	3	3	4	6	8	10	24
332	有倦怠	轻度倦怠	<30岁	住院医师	<2年	50-60h	≤4次	非三甲医院	中型	西部	3-5h	是	是	否	否	是	否	现场/公共场所	每届都看	只看决赛/关键场次	无安排	偶尔	独自观看	否	4	3	4	9	9	10	28
333	有倦怠	轻度倦怠	30-34岁	主治医师	>5年	<50h	≤4次	非三甲医院	大型	东部	<1h	否	否	否	否	否	是	现场/公共场所	主要看中国队比赛	只看决赛/关键场次	无安排	经常	独自观看	否	3	2	3	4	13	7	24
334	有倦怠	中度倦怠	≥45岁	副主任医师	>5年	50-60h	≤4次	非三甲医院	中型	西部	<1h	否	否	否	否	否	是	短视频片段	主要看中国队比赛	只看决赛/关键场次	休息区播放	偶尔	独自观看	否	4	3	3	13	9	10	32
335	有倦怠	中度倦怠	40-44岁	主任医师	>5年	50-60h	5-8次	非三甲医院	中型	中部	1-3h	否	是	是	否	是	否	短视频片段	主要看中国队比赛	只看决赛/关键场次	无安排	偶尔	与同事/朋友	是	3	2	3	11	13	9	33
336	有倦怠	中度倦怠	40-44岁	副主任医师	>5年	61-70h	5-8次	三甲医院	大型	西部	<1h	是	否	否	否	是	否	短视频片段	每届都看	只看决赛/关键场次	无安排	偶尔	与同事/朋友	否	3	3	3	15	13	5	33
337	无倦怠		30-34岁	主治医师	2-5年	61-70h	5-8次	三甲医院	大型	中部	<1h	是	是	否	否	是	否	直播	主要看中国队比赛	只看决赛/关键场次	无安排	偶尔	独自观看	否	3	3	4	3	4	5	12
338	有倦怠	轻度倦怠	≥45岁	主任医师	>5年	50-60h	≤4次	非三甲医院	中型	西部	1-3h	是	是	否	否	否	否	直播	每届都看	全程跟踪重要比赛	无安排	从不	独自观看	否	2	3	3	7	7	14	28
339	有倦怠	中度倦怠	30-34岁	主治医师	2-5年	50-60h	≤4次	非三甲医院	小型	中部	>5h	是	否	是	否	是	否	图文战报	每届都看	只看决赛/关键场次	调班排版	偶尔	独自观看	是	3	3	3	10	10	10	30
340	有倦怠	重度倦怠	30-34岁	主治医师	2-5年	61-70h	5-8次	非三甲医院	中型	中部	<1h	否	否	否	否	否	是	直播	主要看中国队比赛	只看决赛/关键场次	无安排	偶尔	球迷组织活动	否	3	4	4	15	12	15	42
341	有倦怠	轻度倦怠	<30岁	住院医师	<2年	>80h	≥9次	三甲医院	大型	东部	<1h	否	否	否	否	是	否	图文战报	每届都看	只看决赛/关键场次	无安排	偶尔	独自观看	否	3	3	3	4	9	7	20
342	无倦怠		35-39岁	主治医师	2-5年	50-60h	5-8次	三甲医院	小型	东北	<1h	是	是	否	否	否	否	直播	每届都看	全程跟踪重要比赛	无安排	偶尔	独自观看	否	3	3	3	5	3	0	8
343	有倦怠	中度倦怠	<30岁	住院医师	2-5年	50-60h	5-8次	三甲医院	大型	东部	<1h	否	否	否	否	否	是	直播	每届都看	只看决赛/关键场次	无安排	偶尔	独自观看	否	3	3	3	10	7	14	31
344	有倦怠	中度倦怠	30-34岁	副主任医师	>5年	>80h	5-8次	非三甲医院	中型	中部	<1h	否	否	否	否	是	否	直播	主要看中国队比赛	只看决赛/关键场次	无安排	偶尔	独自观看	否	3	3	3	11	9	9	29
345	无倦怠		<30岁	住院医师	<2年	50-60h	5-8次	三甲医院	中型	西部	3-5h	是	是	否	否	否	否	短视频片段	每届都看	只看决赛/关键场次	调班排版	偶尔	与家人	是	3	3	3	6	3	5	14
346	有倦怠	轻度倦怠	40-44岁	副主任医师	>5年	>80h	5-8次	三甲医院	大型	东部	3-5h	否	否	否	是	是	否	直播	偶尔看看	全程跟踪重要比赛	休息区播放	偶尔	与同事/朋友	否	3	3	2	6	10	12	28
347	有倦怠	中度倦怠	30-34岁	副主任医师	>5年	<50h	≤4次	三甲医院	大型	西部	3-5h	是	是	否	是	否	否	直播	每届都看	全程跟踪重要比赛	调班排版	偶尔	独自观看	否	3	3	3	11	11	7	29
348	有倦怠	中度倦怠	40-44岁	主治医师	>5年	50-60h	5-8次	三甲医院	大型	东北	<1h	否	否	是	否	否	是	短视频片段	每届都看	全程跟踪重要比赛	无安排	偶尔	独自观看	否	2	3	3	12	9	11	32
349	有倦怠	中度倦怠	≥45岁	副主任医师	>5年	50-60h	5-8次	非三甲医院	中型	东部	3-5h	否	否	否	否	否	是	直播	主要看中国队比赛	全程跟踪重要比赛	无安排	偶尔	与同事/朋友	否	3	3	2	8	13	11	32
350	有倦怠	重度倦怠	≥45岁	主治医师	>5年	61-70h	5-8次	非三甲医院	中型	东部	<1h	否	否	否	否	否	是	直播	偶尔看看	只看决赛/关键场次	无安排	偶尔	球迷组织活动	否	3	2	3	15	14	15	44
351	无倦怠		≥45岁	副主任医师	>5年	61-70h	5-8次	三甲医院	大型	中部	3-5h	否	否	否	否	是	否	短视频片段	主要看中国队比赛	只看决赛/关键场次	无安排	偶尔	独自观看	否	2	3	3	6	6	2	14
352	有倦怠	轻度倦怠	35-39岁	副主任医师	>5年	50-60h	5-8次	非三甲医院	中型	中部	1-3h	是	否	否	否	否	否	直播	每届都看	通过集锦了解	休息区播放	偶尔	与同事/朋友	否	2	4	3	7	8	7	22
353	有倦怠	重度倦怠	35-39岁	主治医师	>5年	50-60h	5-8次	非三甲医院	小型	东部	1-3h	否	否	否	否	否	是	直播	每届都看	只看决赛/关键场次	休息区播放	偶尔	独自观看	否	3	3	2	8	18	16	42
354	无倦怠		40-44岁	副主任医师	>5年	50-60h	≤4次	三甲医院	中型	中部	3-5h	是	是	否	否	否	否	短视频片段	偶尔看看	全程跟踪重要比赛	无安排	偶尔	与同事/朋友	否	3	2	3	4	3	2	9
355	有倦怠	轻度倦怠	<30岁	住院医师	<2年	50-60h	5-8次	三甲医院	大型	中部	3-5h	否	否	是	否	否	否	直播	主要看中国队比赛	参与线上讨论	无安排	偶尔	独自观看	是	3	2	3	7	9	8	24
356	无倦怠		40-44岁	副主任医师	>5年	50-60h	5-8次	三甲医院	大型	东北	<1h	是	否	否	否	否	否	图文战报	偶尔看看	只看决赛/关键场次	无安排	偶尔	球迷组织活动	是	2	3	4	6	3	5	14
357	有倦怠	重度倦怠	40-44岁	副主任医师	>5年	71-80h	5-8次	非三甲医院	小型	东北	1-3h	否	是	否	否	否	否	短视频片段	主要看中国队比赛	全程跟踪重要比赛	无安排	偶尔	独自观看	否	3	3	3	16	12	15	43
358	有倦怠	轻度倦怠	30-34岁	主治医师	2-5年	71-80h	5-8次	三甲医院	大型	东部	<1h	否	否	否	否	否	是	直播	每届都看	参与线上讨论	休息区播放	从不	与同事/朋友	否	3	2	3	8	13	3	24
359	有倦怠	轻度倦怠	≥45岁	主任医师	>5年	61-70h	5-8次	三甲医院	大型	西部	3-5h	否	否	否	否	是	否	短视频片段	基本不看	参与线上讨论	休息区播放	从不	独自观看	否	3	3	2	8	6	11	25
360	有倦怠	轻度倦怠	≥45岁	主任医师	>5年	>80h	≥9次	三甲医院	大型	西部	3-5h	否	否	否	否	否	是	短视频片段	每届都看	参与线上讨论	无安排	偶尔	独自观看	否	3	3	3	5	7	8	20
361	无倦怠		40-44岁	副主任医师	>5年	61-70h	5-8次	三甲医院	大型	西部	3-5h	否	是	否	否	否	是	直播	主要看中国队比赛	只看决赛/关键场次	无安排	从不	与家人	否	2	3	4	3	3	5	11
362	有倦怠	中度倦怠	<30岁	住院医师	2-5年	50-60h	≤4次	三甲医院	大型	东部	<1h	否	否	否	否	否	是	直播	主要看中国队比赛	只看决赛/关键场次	无安排	偶尔	与同事/朋友	是	3	3	2	8	12	11	31
363	有倦怠	重度倦怠	30-34岁	主治医师	2-5年	>80h	5-8次	非三甲医院	中型	东部	<1h	否	否	否	否	否	是	直播	基本不看	只看决赛/关键场次	无安排	从不	独自观看	否	3	3	3	14	14	15	43
364	有倦怠	轻度倦怠	40-44岁	副主任医师	>5年	50-60h	≤4次	非三甲医院	中型	东北	1-3h	否	否	否	否	否	是	直播	主要看中国队比赛	通过集锦了解	无安排	偶尔	独自观看	否	3	3	3	11	8	8	27
365	有倦怠	轻度倦怠	35-39岁	副主任医师	>5年	71-80h	5-8次	三甲医院	大型	东北	1-3h	否	否	否	是	否	否	直播	主要看中国队比赛	只看决赛/关键场次	无安排	偶尔	独自观看	否	3	3	3	8	8	12	28
366	有倦怠	中度倦怠	40-44岁	副主任医师	>5年	61-70h	5-8次	非三甲医院	中型	东部	1-3h	否	否	否	否	否	是	直播	每届都看	只看决赛/关键场次	调班排版	偶尔	独自观看	否	3	4	3	17	9	10	36
367	有倦怠	轻度倦怠	40-44岁	副主任医师	>5年	50-60h	5-8次	三甲医院	大型	西部	1-3h	是	是	否	否	否	否	短视频片段	每届都看	只看决赛/关键场次	无安排	经常	与同事/朋友	是	2	2	2	9	6	6	21
368	有倦怠	重度倦怠	35-39岁	主治医师	>5年	71-80h	≤4次	三甲医院	大型	东部	<1h	否	否	否	是	否	否	短视频片段	每届都看	全程跟踪重要比赛	无安排	偶尔	与家人	否	4	3	3	16	18	13	47
369	无倦怠		35-39岁	主任医师	>5年	71-80h	5-8次	三甲医院	大型	西部	>5h	是	否	否	否	否	否	短视频片段	每届都看	只看决赛/关键场次	无安排	经常	球迷组织活动	是	2	3	3	3	4	5	12
370	有倦怠	中度倦怠	35-39岁	主治医师	>5年	>80h	5-8次	三甲医院	大型	西部	<1h	是	否	是	否	否	否	直播	每届都看	只看决赛/关键场次	无安排	偶尔	与家人	否	3	4	3	12	11	7	30
371	有倦怠	轻度倦怠	40-44岁	副主任医师	>5年	50-60h	5-8次	三甲医院	小型	中部	3-5h	是	是	是	否	否	否	现场/公共场所	每届都看	只看决赛/关键场次	调班排版	偶尔	与同事/朋友	否	3	3	2	10	8	7	25
372	有倦怠	重度倦怠	30-34岁	主治医师	2-5年	50-60h	≤4次	三甲医院	大型	东部	<1h	是	是	是	否	否	否	短视频片段	主要看中国队比赛	参与线上讨论	无安排	经常	与同事/朋友	否	3	3	4	15	12	16	43
373	有倦怠	中度倦怠	30-34岁	主治医师	2-5年	61-70h	5-8次	三甲医院	大型	东部	<1h	否	是	否	否	是	否	直播	每届都看	只看决赛/关键场次	无安排	从不	球迷组织活动	否	3	3	2	12	9	10	31
374	有倦怠	中度倦怠	≥45岁	主任医师	>5年	61-70h	≥9次	三甲医院	大型	东北	3-5h	是	否	否	否	否	否	直播	每届都看	只看决赛/关键场次	无安排	偶尔	与同事/朋友	否	3	3	4	11	13	6	30
375	有倦怠	轻度倦怠	30-34岁	主治医师	2-5年	50-60h	≤4次	三甲医院	大型	中部	3-5h	否	是	否	否	是	否	直播	主要看中国队比赛	只看决赛/关键场次	无安排	偶尔	独自观看	否	3	3	4	9	11	7	27
376	有倦怠	中度倦怠	35-39岁	主治医师	>5年	50-60h	≤4次	三甲医院	大型	中部	1-3h	是	否	是	否	否	否	短视频片段	每届都看	只看决赛/关键场次	无安排	经常	独自观看	否	3	3	3	8	13	12	33
377	有倦怠	轻度倦怠	40-44岁	主治医师	>5年	61-70h	5-8次	非三甲医院	中型	东部	1-3h	是	是	否	否	否	否	直播	每届都看	参与线上讨论	休息区播放	经常	与家人	否	3	3	3	9	8	7	24
378	有倦怠	轻度倦怠	30-34岁	主治医师	2-5年	<50h	≤4次	非三甲医院	中型	西部	3-5h	否	否	是	否	是	否	短视频片段	主要看中国队比赛	只看决赛/关键场次	无安排	偶尔	与同事/朋友	否	3	2	4	8	10	7	25
379	有倦怠	中度倦怠	30-34岁	主治医师	2-5年	>80h	≥9次	三甲医院	大型	西部	3-5h	否	否	是	否	否	否	短视频片段	每届都看	只看决赛/关键场次	休息区播放	经常	独自观看	否	2	4	3	11	7	13	31
380	无倦怠		35-39岁	主治医师	2-5年	<50h	≤4次	三甲医院	大型	中部	1-3h	是	是	是	否	否	是	直播	每届都看	只看决赛/关键场次	无安排	偶尔	与家人	否	3	3	3	6	4	4	14
381	有倦怠	重度倦怠	35-39岁	副主任医师	>5年	50-60h	≤4次	三甲医院	小型	东部	<1h	否	否	否	否	是	否	现场/公共场所	每届都看	通过集锦了解	休息区播放	偶尔	与家人	否	3	3	3	13	16	15	44
382	无倦怠		40-44岁	副主任医师	>5年	50-60h	5-8次	非三甲医院	小型	中部	3-5h	是	否	否	否	是	是	直播	偶尔看看	只看决赛/关键场次	无安排	偶尔	独自观看	否	4	3	3	5	3	5	13
383	有倦怠	轻度倦怠	40-44岁	主任医师	>5年	50-60h	≤4次	非三甲医院	中型	东部	<1h	是	是	否	否	否	否	短视频片段	主要看中国队比赛	只看决赛/关键场次	无安排	偶尔	与同事/朋友	否	3	3	3	6	7	3	16
384	有倦怠	轻度倦怠	35-39岁	副主任医师	>5年	71-80h	≥9次	非三甲医院	中型	西部	1-3h	是	是	否	是	否	否	短视频片段	每届都看	全程跟踪重要比赛	无安排	偶尔	独自观看	否	3	3	3	8	8	8	24
385	有倦怠	中度倦怠	35-39岁	副主任医师	>5年	50-60h	5-8次	三甲医院	大型	中部	>5h	否	否	否	是	否	否	短视频片段	每届都看	只看决赛/关键场次	无安排	偶尔	独自观看	否	3	4	3	13	10	14	37
386	有倦怠	重度倦怠	40-44岁	主治医师	>5年	50-60h	5-8次	三甲医院	小型	东部	<1h	否	否	是	否	否	否	图文战报	每届都看	只看决赛/关键场次	无安排	经常	独自观看	否	3	3	4	13	12	17	42
387	有倦怠	轻度倦怠	30-34岁	住院医师	2-5年	<50h	≤4次	三甲医院	大型	西部	3-5h	否	否	否	否	否	是	直播	主要看中国队比赛	参与线上讨论	无安排	经常	与同事/朋友	否	3	3	3	8	4	6	18
388	有倦怠	轻度倦怠	30-34岁	主治医师	2-5年	>80h	5-8次	三甲医院	大型	东部	<1h	否	否	否	否	否	是	短视频片段	每届都看	只看决赛/关键场次	无安排	偶尔	与同事/朋友	否	3	3	4	13	7	7	27
389	有倦怠	中度倦怠	30-34岁	主治医师	2-5年	61-70h	5-8次	三甲医院	大型	西部	1-3h	是	是	否	否	否	否	短视频片段	主要看中国队比赛	通过集锦了解	无安排	偶尔	与家人	否	3	3	3	16	14	6	36
390	有倦怠	中度倦怠	35-39岁	主治医师	2-5年	50-60h	5-8次	非三甲医院	小型	西部	1-3h	否	否	否	是	否	否	直播	每届都看	通过集锦了解	无安排	偶尔	独自观看	否	3	2	3	11	16	5	32
391	有倦怠	轻度倦怠	30-34岁	主治医师	2-5年	>80h	≥9次	非三甲医院	中型	西部	3-5h	否	否	否	否	否	是	图文战报	主要看中国队比赛	只看决赛/关键场次	休息区播放	偶尔	独自观看	否	3	3	3	6	6	10	22
392	有倦怠	轻度倦怠	35-39岁	主治医师	>5年	50-60h	≤4次	三甲医院	大型	西部	1-3h	是	是	否	否	是	否	现场/公共场所	偶尔看看	只看决赛/关键场次	无安排	经常	独自观看	是	4	3	3	9	5	14	28
393	有倦怠	轻度倦怠	≥45岁	副主任医师	>5年	50-60h	5-8次	三甲医院	大型	中部	<1h	是	否	否	否	否	否	直播	每届都看	只看决赛/关键场次	无安排	偶尔	与家人	否	4	3	3	8	6	11	25
394	无倦怠		30-34岁	住院医师	2-5年	61-70h	5-8次	非三甲医院	小型	中部	3-5h	否	是	否	否	否	否	直播	主要看中国队比赛	只看决赛/关键场次	休息区播放	偶尔	球迷组织活动	是	3	3	3	6	4	2	12
395	有倦怠	轻度倦怠	30-34岁	主治医师	2-5年	50-60h	≤4次	非三甲医院	中型	东北	<1h	是	否	否	否	否	否	图文战报	基本不看	只看决赛/关键场次	无安排	偶尔	独自观看	是	3	2	3	7	5	11	23
396	有倦怠	轻度倦怠	<30岁	住院医师	<2年	50-60h	5-8次	三甲医院	大型	西部	3-5h	否	否	否	否	否	是	现场/公共场所	每届都看	全程跟踪重要比赛	无安排	从不	独自观看	否	3	3	3	8	5	5	18
397	有倦怠	重度倦怠	30-34岁	主治医师	2-5年	50-60h	≤4次	三甲医院	大型	中部	3-5h	是	否	是	否	是	否	直播	主要看中国队比赛	全程跟踪重要比赛	无安排	偶尔	与家人	否	3	3	3	11	18	13	42
398	无倦怠		≥45岁	主任医师	>5年	71-80h	≥9次	三甲医院	中型	西部	3-5h	是	是	否	是	是	否	短视频片段	每届都看	只看决赛/关键场次	调班排版	偶尔	独自观看	否	3	2	3	4	7	3	14
399	有倦怠	轻度倦怠	<30岁	住院医师	<2年	>80h	5-8次	三甲医院	大型	东部	3-5h	否	否	否	是	否	否	直播	每届都看	只看决赛/关键场次	休息区播放	从不	独自观看	否	3	3	3	4	7	6	17
400	有倦怠	轻度倦怠	30-34岁	主治医师	>5年	50-60h	5-8次	三甲医院	大型	中部	1-3h	是	是	否	否	否	否	直播	主要看中国队比赛	全程跟踪重要比赛	无安排	经常	独自观看	是	3	3	2	8	11	5	24
401	有倦怠	重度倦怠	30-34岁	主治医师	2-5年	<50h	≤4次	非三甲医院	小型	东部	<1h	否	是	否	否	否	否	直播	每届都看	只看决赛/关键场次	无安排	偶尔	独自观看	否	3	2	3	16	9	18	43
402	无倦怠		<30岁	住院医师	<2年	61-70h	5-8次	三甲医院	大型	东北	>5h	否	是	否	否	否	否	现场/公共场所	主要看中国队比赛	全程跟踪重要比赛	无安排	偶尔	与家人	否	4	3	4	6	3	4	13
403	无倦怠		40-44岁	副主任医师	>5年	<50h	≥9次	三甲医院	中型	东北	>5h	否	是	否	否	否	否	短视频片段	主要看中国队比赛	全程跟踪重要比赛	休息区播放	偶尔	与同事/朋友	否	3	2	3	8	3	2	13
404	无倦怠		40-44岁	副主任医师	>5年	50-60h	5-8次	三甲医院	大型	西部	<1h	否	是	否	否	否	否	现场/公共场所	每届都看	参与线上讨论	无安排	经常	独自观看	否	3	3	4	5	3	6	14
405	有倦怠	中度倦怠	≥45岁	副主任医师	>5年	50-60h	5-8次	三甲医院	大型	西部	<1h	否	否	是	否	否	否	直播	偶尔看看	只看决赛/关键场次	无安排	从不	与家人	否	3	3	3	9	13	10	32
406	有倦怠	中度倦怠	40-44岁	主治医师	>5年	50-60h	≤4次	非三甲医院	小型	中部	1-3h	是	否	是	否	否	否	直播	基本不看	全程跟踪重要比赛	无安排	偶尔	独自观看	否	2	2	3	14	11	5	30
407	有倦怠	重度倦怠	30-34岁	主治医师	2-5年	71-80h	≥9次	非三甲医院	中型	西部	1-3h	否	否	否	否	否	是	短视频片段	主要看中国队比赛	全程跟踪重要比赛	无安排	偶尔	与家人	是	3	3	3	12	20	14	46
408	有倦怠	中度倦怠	30-34岁	副主任医师	>5年	50-60h	≤4次	三甲医院	大型	西部	>5h	是	否	否	否	是	否	直播	偶尔看看	全程跟踪重要比赛	调班排版	从不	与家人	否	2	2	3	12	11	6	29
409	有倦怠	轻度倦怠	<30岁	住院医师	<2年	61-70h	≥9次	三甲医院	大型	东部	3-5h	是	是	否	否	是	否	直播	每届都看	只看决赛/关键场次	无安排	从不	与家人	否	2	3	4	8	3	5	16
410	有倦怠	轻度倦怠	40-44岁	主任医师	>5年	61-70h	≥9次	非三甲医院	中型	中部	<1h	是	否	是	是	否	否	图文战报	基本不看	全程跟踪重要比赛	无安排	偶尔	与同事/朋友	是	3	3	3	4	11	2	17
411	有倦怠	重度倦怠	30-34岁	主治医师	2-5年	>80h	5-8次	三甲医院	大型	中部	3-5h	是	是	是	否	否	否	现场/公共场所	偶尔看看	全程跟踪重要比赛	无安排	从不	与同事/朋友	否	4	3	3	17	17	12	46
412	有倦怠	轻度倦怠	40-44岁	副主任医师	>5年	50-60h	≤4次	非三甲医院	小型	西部	3-5h	是	是	否	否	否	否	直播	基本不看	参与线上讨论	休息区播放	从不	独自观看	否	3	3	4	12	8	5	25
413	有倦怠	中度倦怠	<30岁	住院医师	2-5年	61-70h	5-8次	非三甲医院	小型	西部	<1h	否	是	是	否	是	否	现场/公共场所	每届都看	全程跟踪重要比赛	无安排	偶尔	独自观看	否	3	4	3	11	10	9	30
414	无倦怠		30-34岁	住院医师	<2年	<50h	≤4次	非三甲医院	小型	东部	3-5h	是	是	否	否	否	否	直播	基本不看	只看决赛/关键场次	无安排	从不	与同事/朋友	否	4	2	3	4	3	2	9
415	无倦怠		≥45岁	副主任医师	>5年	50-60h	5-8次	三甲医院	大型	西部	3-5h	是	否	否	否	否	否	现场/公共场所	每届都看	只看决赛/关键场次	无安排	经常	独自观看	否	4	3	3	5	6	3	14
416	无倦怠		≥45岁	主任医师	>5年	50-60h	≥9次	三甲医院	大型	中部	3-5h	是	是	否	否	否	否	短视频片段	每届都看	只看决赛/关键场次	调班排版	偶尔	独自观看	否	3	2	2	4	7	2	13
417	有倦怠	中度倦怠	35-39岁	主治医师	>5年	71-80h	≥9次	非三甲医院	小型	中部	<1h	是	否	否	否	是	否	短视频片段	每届都看	只看决赛/关键场次	无安排	偶尔	与家人	否	3	3	4	12	10	9	31
418	有倦怠	中度倦怠	40-44岁	副主任医师	>5年	61-70h	≥9次	三甲医院	大型	东部	1-3h	否	否	否	否	否	是	直播	每届都看	只看决赛/关键场次	无安排	偶尔	独自观看	是	3	2	3	6	9	14	29
419	有倦怠	中度倦怠	<30岁	住院医师	<2年	>80h	5-8次	非三甲医院	大型	中部	<1h	否	否	否	否	否	是	图文战报	每届都看	只看决赛/关键场次	无安排	偶尔	独自观看	是	4	3	4	10	9	11	30
420	无倦怠		40-44岁	副主任医师	>5年	50-60h	≤4次	三甲医院	中型	东北	3-5h	否	是	否	否	是	否	直播	主要看中国队比赛	只看决赛/关键场次	无安排	从不	与家人	否	3	2	3	6	5	2	13
421	有倦怠	中度倦怠	<30岁	住院医师	<2年	61-70h	5-8次	三甲医院	大型	东部	<1h	是	是	是	是	否	否	图文战报	每届都看	参与线上讨论	无安排	从不	独自观看	否	3	3	4	13	8	12	33
422	有倦怠	中度倦怠	<30岁	住院医师	2-5年	61-70h	5-8次	非三甲医院	小型	中部	<1h	是	否	是	否	否	否	直播	每届都看	只看决赛/关键场次	无安排	偶尔	与同事/朋友	否	3	3	3	14	8	10	32
423	无倦怠		35-39岁	主治医师	>5年	61-70h	5-8次	三甲医院	大型	中部	<1h	是	是	否	否	否	否	直播	每届都看	通过集锦了解	无安排	偶尔	独自观看	否	3	3	3	6	4	2	12
424	无倦怠		40-44岁	主治医师	>5年	50-60h	≥9次	三甲医院	大型	西部	<1h	否	是	否	否	否	否	直播	每届都看	只看决赛/关键场次	无安排	偶尔	与同事/朋友	是	3	3	3	3	5	6	14
425	无倦怠		30-34岁	住院医师	2-5年	50-60h	5-8次	三甲医院	大型	中部	1-3h	是	否	是	否	否	否	直播	主要看中国队比赛	只看决赛/关键场次	调班排版	偶尔	独自观看	否	3	3	3	4	5	1	10
426	有倦怠	轻度倦怠	30-34岁	主治医师	2-5年	71-80h	≥9次	三甲医院	小型	东北	>5h	否	是	否	否	是	否	直播	每届都看	全程跟踪重要比赛	无安排	从不	与同事/朋友	否	3	3	3	9	3	13	25
427	有倦怠	中度倦怠	<30岁	住院医师	<2年	50-60h	5-8次	非三甲医院	中型	东部	1-3h	是	否	否	否	否	否	直播	每届都看	只看决赛/关键场次	调班排版	偶尔	与家人	否	4	3	3	5	13	12	30
428	有倦怠	中度倦怠	30-34岁	主治医师	2-5年	50-60h	5-8次	非三甲医院	中型	西部	1-3h	否	否	是	否	否	否	短视频片段	偶尔看看	参与线上讨论	无安排	偶尔	与家人	否	3	4	4	15	4	12	31
429	有倦怠	重度倦怠	≥45岁	主治医师	>5年	50-60h	≤4次	三甲医院	大型	东部	<1h	否	否	是	否	否	否	短视频片段	每届都看	只看决赛/关键场次	调班排版	经常	独自观看	否	3	3	3	16	13	14	43
430	有倦怠	轻度倦怠	<30岁	住院医师	<2年	50-60h	5-8次	三甲医院	大型	东北	1-3h	是	是	否	否	是	是	短视频片段	每届都看	只看决赛/关键场次	无安排	偶尔	独自观看	否	2	3	3	8	5	8	21
431	有倦怠	轻度倦怠	35-39岁	主治医师	>5年	61-70h	5-8次	三甲医院	小型	中部	<1h	是	是	是	否	是	否	现场/公共场所	主要看中国队比赛	只看决赛/关键场次	休息区播放	偶尔	独自观看	否	3	3	3	8	9	8	25
432	有倦怠	轻度倦怠	35-39岁	主治医师	>5年	>80h	5-8次	三甲医院	大型	东部	<1h	是	是	否	否	否	否	直播	主要看中国队比赛	全程跟踪重要比赛	无安排	偶尔	球迷组织活动	是	3	3	3	8	8	6	22
433	无倦怠		≥45岁	主治医师	>5年	61-70h	5-8次	非三甲医院	中型	东北	>5h	是	是	否	否	否	否	直播	每届都看	参与线上讨论	无安排	偶尔	独自观看	否	3	4	3	7	5	0	12
434	有倦怠	中度倦怠	≥45岁	主任医师	>5年	71-80h	≥9次	非三甲医院	大型	西部	1-3h	是	否	否	否	否	否	直播	基本不看	全程跟踪重要比赛	无安排	偶尔	球迷组织活动	否	3	2	3	8	12	12	32
435	有倦怠	轻度倦怠	30-34岁	主治医师	2-5年	50-60h	5-8次	三甲医院	大型	中部	3-5h	是	是	是	否	是	否	直播	每届都看	只看决赛/关键场次	无安排	偶尔	与同事/朋友	否	3	3	3	6	7	15	28
436	无倦怠		35-39岁	主治医师	2-5年	50-60h	5-8次	三甲医院	大型	东北	>5h	否	是	是	是	是	是	直播	主要看中国队比赛	全程跟踪重要比赛	无安排	偶尔	与家人	否	3	4	4	4	4	6	14
437	无倦怠		30-34岁	主治医师	2-5年	50-60h	5-8次	三甲医院	小型	东部	1-3h	是	否	否	否	否	否	图文战报	每届都看	全程跟踪重要比赛	无安排	偶尔	球迷组织活动	否	3	4	2	5	3	1	9
438	有倦怠	中度倦怠	35-39岁	主治医师	>5年	50-60h	5-8次	三甲医院	大型	中部	3-5h	否	否	否	否	否	是	直播	每届都看	只看决赛/关键场次	无安排	偶尔	独自观看	否	3	3	3	5	14	13	32
439	有倦怠	轻度倦怠	40-44岁	副主任医师	>5年	50-60h	5-8次	三甲医院	小型	西部	3-5h	否	否	否	是	否	否	短视频片段	偶尔看看	只看决赛/关键场次	调班排版	偶尔	球迷组织活动	是	3	3	2	6	7	12	25
440	有倦怠	中度倦怠	35-39岁	主治医师	>5年	50-60h	5-8次	三甲医院	小型	西部	<1h	否	否	否	否	是	否	直播	偶尔看看	参与线上讨论	休息区播放	偶尔	与同事/朋友	否	3	2	3	12	12	9	33
441	有倦怠	中度倦怠	35-39岁	主治医师	>5年	50-60h	≤4次	三甲医院	大型	中部	3-5h	否	否	否	否	否	是	直播	主要看中国队比赛	只看决赛/关键场次	无安排	偶尔	与同事/朋友	是	3	3	3	10	12	11	33
442	有倦怠	中度倦怠	40-44岁	主治医师	>5年	50-60h	5-8次	三甲医院	小型	中部	<1h	是	是	否	否	是	是	直播	主要看中国队比赛	只看决赛/关键场次	无安排	经常	独自观看	否	3	3	3	10	10	11	31
443	无倦怠		35-39岁	主任医师	>5年	50-60h	5-8次	三甲医院	大型	中部	3-5h	否	否	否	否	否	是	现场/公共场所	偶尔看看	通过集锦了解	无安排	经常	独自观看	否	3	3	4	4	3	2	9
444	有倦怠	重度倦怠	30-34岁	主治医师	2-5年	50-60h	5-8次	非三甲医院	中型	东部	<1h	否	是	否	是	否	否	直播	主要看中国队比赛	参与线上讨论	无安排	偶尔	球迷组织活动	是	3	3	3	13	19	13	45
445	有倦怠	轻度倦怠	35-39岁	副主任医师	>5年	50-60h	≤4次	非三甲医院	中型	西部	1-3h	是	否	否	是	是	否	直播	主要看中国队比赛	只看决赛/关键场次	无安排	从不	与家人	否	3	3	3	6	12	5	23
446	无倦怠		35-39岁	主治医师	>5年	61-70h	5-8次	三甲医院	小型	东北	<1h	否	否	否	否	否	是	直播	每届都看	全程跟踪重要比赛	无安排	偶尔	独自观看	否	3	4	3	5	7	2	14
447	有倦怠	轻度倦怠	<30岁	住院医师	<2年	>80h	≥9次	三甲医院	中型	东北	<1h	是	否	否	否	否	否	短视频片段	每届都看	只看决赛/关键场次	无安排	偶尔	与家人	否	4	4	4	9	5	7	21
448	有倦怠	轻度倦怠	30-34岁	主治医师	2-5年	50-60h	5-8次	非三甲医院	小型	东北	3-5h	是	是	否	否	是	否	短视频片段	每届都看	全程跟踪重要比赛	休息区播放	经常	独自观看	否	3	3	3	14	5	8	27
449	有倦怠	重度倦怠	35-39岁	主治医师	>5年	50-60h	≤4次	三甲医院	大型	中部	<1h	是	是	是	否	否	否	短视频片段	主要看中国队比赛	只看决赛/关键场次	无安排	偶尔	与家人	否	2	4	3	14	10	18	42
450	无倦怠		30-34岁	主治医师	2-5年	50-60h	5-8次	三甲医院	小型	东部	1-3h	是	否	否	否	否	否	现场/公共场所	每届都看	只看决赛/关键场次	休息区播放	从不	与同事/朋友	是	3	2	2	5	3	1	9
451	有倦怠	轻度倦怠	<30岁	住院医师	<2年	50-60h	5-8次	非三甲医院	中型	东北	<1h	是	否	否	否	否	否	直播	主要看中国队比赛	参与线上讨论	无安排	经常	独自观看	否	3	3	3	11	7	3	21
452	有倦怠	中度倦怠	35-39岁	副主任医师	>5年	<50h	≤4次	三甲医院	大型	西部	3-5h	否	是	是	否	是	否	直播	主要看中国队比赛	只看决赛/关键场次	无安排	偶尔	独自观看	是	3	3	3	12	9	13	34
453	有倦怠	中度倦怠	35-39岁	主治医师	>5年	61-70h	5-8次	非三甲医院	中型	东部	<1h	否	否	否	是	是	是	直播	每届都看	全程跟踪重要比赛	无安排	经常	与同事/朋友	是	3	3	3	12	8	11	31
454	无倦怠		30-34岁	住院医师	<2年	50-60h	≤4次	三甲医院	中型	西部	1-3h	否	是	否	否	否	否	图文战报	主要看中国队比赛	全程跟踪重要比赛	无安排	偶尔	独自观看	否	3	4	3	6	3	5	14
455	有倦怠	轻度倦怠	40-44岁	副主任医师	>5年	50-60h	≤4次	非三甲医院	中型	东北	<1h	是	是	否	否	否	否	直播	主要看中国队比赛	只看决赛/关键场次	休息区播放	偶尔	独自观看	是	3	3	3	7	10	8	25
456	无倦怠		35-39岁	主治医师	>5年	50-60h	5-8次	三甲医院	大型	中部	3-5h	否	是	否	否	是	是	图文战报	每届都看	只看决赛/关键场次	调班排版	偶尔	独自观看	否	3	3	4	4	7	2	13
457	无倦怠		30-34岁	主治医师	2-5年	61-70h	5-8次	非三甲医院	中型	中部	3-5h	否	否	否	否	否	是	短视频片段	主要看中国队比赛	全程跟踪重要比赛	无安排	经常	独自观看	否	4	4	3	4	7	2	13
458	无倦怠		30-34岁	住院医师	2-5年	50-60h	≥9次	非三甲医院	中型	中部	3-5h	否	否	否	否	否	是	直播	每届都看	参与线上讨论	调班排版	偶尔	独自观看	否	4	3	3	4	3	6	13
459	有倦怠	轻度倦怠	≥45岁	副主任医师	>5年	50-60h	≤4次	三甲医院	大型	东北	>5h	是	是	否	否	否	否	直播	主要看中国队比赛	参与线上讨论	无安排	从不	与同事/朋友	否	3	3	3	10	6	5	21
460	有倦怠	中度倦怠	40-44岁	副主任医师	>5年	50-60h	5-8次	非三甲医院	小型	东部	<1h	否	否	是	否	否	否	短视频片段	偶尔看看	参与线上讨论	无安排	偶尔	与同事/朋友	否	2	4	3	14	11	6	31
461	有倦怠	中度倦怠	<30岁	住院医师	<2年	50-60h	≤4次	三甲医院	大型	西部	1-3h	是	否	否	否	否	否	直播	每届都看	只看决赛/关键场次	无安排	偶尔	独自观看	否	3	3	3	14	10	7	31
462	无倦怠		35-39岁	副主任医师	2-5年	50-60h	≥9次	三甲医院	大型	东北	>5h	否	否	是	否	否	否	短视频片段	主要看中国队比赛	只看决赛/关键场次	无安排	经常	独自观看	否	4	4	3	4	4	6	14
463	有倦怠	轻度倦怠	35-39岁	主治医师	>5年	50-60h	5-8次	三甲医院	大型	西部	3-5h	是	是	否	否	否	否	直播	每届都看	全程跟踪重要比赛	无安排	偶尔	与家人	否	3	2	3	7	5	7	19
464	有倦怠	轻度倦怠	≥45岁	主任医师	>5年	50-60h	5-8次	三甲医院	大型	西部	3-5h	是	是	是	否	是	否	短视频片段	每届都看	只看决赛/关键场次	调班排版	偶尔	独自观看	否	3	2	3	12	6	7	25
465	无倦怠		35-39岁	主治医师	>5年	71-80h	5-8次	非三甲医院	小型	西部	3-5h	否	否	否	否	是	否	短视频片段	偶尔看看	全程跟踪重要比赛	无安排	经常	与家人	否	3	3	3	5	3	6	14
466	有倦怠	轻度倦怠	35-39岁	主治医师	>5年	>80h	≥9次	非三甲医院	中型	东部	<1h	是	是	否	否	否	否	短视频片段	每届都看	只看决赛/关键场次	无安排	偶尔	与同事/朋友	否	2	3	3	7	9	12	28
467	无倦怠		40-44岁	副主任医师	>5年	50-60h	≤4次	三甲医院	中型	中部	3-5h	是	是	否	否	否	否	短视频片段	每届都看	只看决赛/关键场次	无安排	偶尔	与同事/朋友	否	3	4	4	4	3	2	9
468	有倦怠	中度倦怠	<30岁	住院医师	2-5年	50-60h	5-8次	三甲医院	小型	中部	<1h	否	是	否	否	否	否	直播	每届都看	全程跟踪重要比赛	无安排	偶尔	与家人	是	3	3	3	14	4	13	31
469	无倦怠		≥45岁	主任医师	>5年	50-60h	5-8次	三甲医院	大型	中部	3-5h	是	否	否	否	是	否	短视频片段	每届都看	通过集锦了解	无安排	偶尔	与家人	是	4	3	3	5	3	6	14
470	有倦怠	轻度倦怠	40-44岁	副主任医师	>5年	50-60h	5-8次	三甲医院	大型	中部	<1h	是	否	否	否	否	否	直播	偶尔看看	全程跟踪重要比赛	无安排	偶尔	与同事/朋友	否	2	3	3	9	11	7	27
471	有倦怠	中度倦怠	≥45岁	副主任医师	>5年	50-60h	5-8次	三甲医院	大型	东部	1-3h	否	否	否	否	否	是	直播	偶尔看看	全程跟踪重要比赛	无安排	从不	独自观看	否	3	3	2	14	7	10	31
472	无倦怠		35-39岁	副主任医师	>5年	<50h	≤4次	三甲医院	大型	中部	1-3h	是	否	否	是	是	否	短视频片段	偶尔看看	通过集锦了解	无安排	从不	独自观看	否	4	2	3	6	5	2	13
473	无倦怠		40-44岁	副主任医师	>5年	<50h	≤4次	三甲医院	大型	中部	3-5h	否	否	否	否	否	是	短视频片段	主要看中国队比赛	全程跟踪重要比赛	无安排	偶尔	球迷组织活动	否	3	4	3	7	3	2	12
474	无倦怠		35-39岁	副主任医师	2-5年	61-70h	5-8次	三甲医院	大型	中部	<1h	是	是	否	否	否	否	短视频片段	每届都看	只看决赛/关键场次	无安排	经常	独自观看	是	3	2	3	4	4	5	13
475	无倦怠		40-44岁	副主任医师	>5年	<50h	≥9次	三甲医院	中型	东北	>5h	否	是	否	否	否	否	现场/公共场所	主要看中国队比赛	参与线上讨论	无安排	偶尔	独自观看	是	3	4	3	8	3	2	13
476	有倦怠	轻度倦怠	35-39岁	主治医师	>5年	50-60h	≤4次	三甲医院	小型	中部	<1h	是	是	否	否	否	否	直播	主要看中国队比赛	只看决赛/关键场次	休息区播放	偶尔	与家人	是	3	2	3	12	3	12	27
477	无倦怠		30-34岁	主治医师	<2年	50-60h	≤4次	三甲医院	大型	东北	>5h	否	否	否	否	否	是	图文战报	每届都看	只看决赛/关键场次	无安排	偶尔	与家人	是	3	3	4	4	3	7	14
478	有倦怠	轻度倦怠	30-34岁	主治医师	2-5年	<50h	≤4次	非三甲医院	中型	西部	3-5h	否	否	否	否	否	是	直播	主要看中国队比赛	全程跟踪重要比赛	调班排版	偶尔	独自观看	是	3	4	3	9	7	8	24
479	有倦怠	中度倦怠	<30岁	住院医师	<2年	50-60h	5-8次	三甲医院	大型	中部	<1h	是	否	是	否	否	否	短视频片段	每届都看	只看决赛/关键场次	无安排	偶尔	与同事/朋友	否	3	2	2	10	14	6	30
480	有倦怠	中度倦怠	40-44岁	副主任医师	>5年	50-60h	5-8次	三甲医院	大型	中部	<1h	是	否	是	否	否	否	直播	主要看中国队比赛	全程跟踪重要比赛	无安排	偶尔	球迷组织活动	否	3	3	3	5	14	11	30
481	有倦怠	轻度倦怠	40-44岁	副主任医师	>5年	71-80h	5-8次	三甲医院	大型	中部	1-3h	是	否	否	否	是	否	短视频片段	主要看中国队比赛	全程跟踪重要比赛	无安排	偶尔	独自观看	否	4	4	3	11	5	5	21
482	有倦怠	轻度倦怠	30-34岁	主治医师	2-5年	50-60h	5-8次	三甲医院	大型	西部	3-5h	否	是	否	否	是	否	现场/公共场所	每届都看	参与线上讨论	无安排	经常	与同事/朋友	否	3	2	3	10	10	8	28
483	无倦怠		≥45岁	主任医师	>5年	50-60h	≥9次	三甲医院	大型	中部	3-5h	是	是	否	否	否	否	短视频片段	偶尔看看	全程跟踪重要比赛	无安排	偶尔	与同事/朋友	否	3	4	3	4	7	2	13
484	有倦怠	中度倦怠	<30岁	住院医师	<2年	50-60h	5-8次	非三甲医院	中型	东部	3-5h	否	否	否	是	否	是	直播	每届都看	只看决赛/关键场次	休息区播放	偶尔	独自观看	是	4	3	4	9	9	13	31
485	无倦怠		40-44岁	副主任医师	>5年	50-60h	5-8次	非三甲医院	小型	中部	3-5h	是	否	否	否	是	否	现场/公共场所	主要看中国队比赛	只看决赛/关键场次	无安排	偶尔	与同事/朋友	否	4	3	4	5	3	5	13
486	有倦怠	重度倦怠	≥45岁	副主任医师	>5年	50-60h	≤4次	三甲医院	大型	东北	<1h	否	否	否	否	否	是	直播	基本不看	只看决赛/关键场次	无安排	偶尔	独自观看	否	3	2	3	14	14	18	46
487	无倦怠		≥45岁	主任医师	>5年	<50h	≤4次	三甲医院	中型	中部	3-5h	否	是	否	否	否	是	短视频片段	主要看中国队比赛	只看决赛/关键场次	调班排版	偶尔	独自观看	否	4	3	3	5	3	1	9
488	无倦怠		35-39岁	主治医师	>5年	50-60h	5-8次	三甲医院	小型	东北	<1h	是	否	是	否	否	否	直播	每届都看	只看决赛/关键场次	无安排	偶尔	独自观看	否	3	4	3	4	8	2	14
489	无倦怠		35-39岁	主治医师	2-5年	61-70h	5-8次	三甲医院	大型	中部	>5h	是	否	否	否	否	否	短视频片段	每届都看	只看决赛/关键场次	无安排	经常	与同事/朋友	否	3	3	3	4	4	6	14
490	无倦怠		40-44岁	主治医师	>5年	61-70h	5-8次	非三甲医院	小型	西部	<1h	是	是	否	是	是	否	图文战报	主要看中国队比赛	只看决赛/关键场次	无安排	偶尔	与同事/朋友	是	3	3	3	6	6	2	14
491	有倦怠	轻度倦怠	35-39岁	副主任医师	>5年	50-60h	≤4次	三甲医院	大型	东北	1-3h	是	是	否	否	否	否	短视频片段	每届都看	只看决赛/关键场次	无安排	偶尔	与家人	否	3	2	2	5	10	3	18
492	有倦怠	重度倦怠	≥45岁	副主任医师	>5年	>80h	≥9次	三甲医院	大型	东部	1-3h	否	否	否	否	否	是	短视频片段	每届都看	通过集锦了解	无安排	偶尔	球迷组织活动	否	3	3	3	16	12	15	43
493	有倦怠	重度倦怠	30-34岁	主治医师	2-5年	>80h	≥9次	三甲医院	大型	东部	1-3h	否	否	是	否	否	否	直播	每届都看	只看决赛/关键场次	无安排	偶尔	独自观看	是	3	3	2	16	9	18	43
494	有倦怠	轻度倦怠	30-34岁	主治医师	2-5年	>80h	5-8次	三甲医院	大型	东部	<1h	否	否	否	否	否	是	短视频片段	主要看中国队比赛	全程跟踪重要比赛	调班排版	经常	与家人	否	2	2	2	4	11	11	26
495	有倦怠	中度倦怠	<30岁	住院医师	2-5年	50-60h	≤4次	非三甲医院	小型	东部	<1h	是	否	是	否	否	否	短视频片段	每届都看	只看决赛/关键场次	无安排	偶尔	独自观看	否	3	3	4	13	13	5	31
496	无倦怠		35-39岁	副主任医师	2-5年	50-60h	≤4次	三甲医院	大型	中部	3-5h	否	否	否	否	否	是	直播	每届都看	通过集锦了解	无安排	偶尔	与家人	否	3	3	3	3	4	5	12
497	有倦怠	中度倦怠	<30岁	住院医师	<2年	61-70h	≥9次	三甲医院	大型	东部	<1h	否	是	否	否	否	否	图文战报	偶尔看看	参与线上讨论	无安排	偶尔	独自观看	是	3	3	4	14	6	11	31
498	有倦怠	轻度倦怠	30-34岁	主治医师	2-5年	>80h	≥9次	非三甲医院	中型	东部	<1h	是	是	否	否	否	否	短视频片段	主要看中国队比赛	只看决赛/关键场次	休息区播放	偶尔	与家人	否	2	3	2	11	7	5	23
499	有倦怠	轻度倦怠	40-44岁	副主任医师	>5年	<50h	≤4次	非三甲医院	小型	中部	3-5h	否	否	否	否	是	否	直播	主要看中国队比赛	只看决赛/关键场次	无安排	偶尔	与同事/朋友	否	2	3	3	10	6	11	27
500	有倦怠	轻度倦怠	40-44岁	副主任医师	>5年	50-60h	5-8次	三甲医院	大型	中部	3-5h	否	否	否	是	否	否	现场/公共场所	主要看中国队比赛	只看决赛/关键场次	调班排版	从不	球迷组织活动	否	3	2	3	7	6	6	19
501	有倦怠	轻度倦怠	30-34岁	主治医师	2-5年	71-80h	≥9次	三甲医院	大型	东部	<1h	是	是	否	否	否	否	直播	偶尔看看	只看决赛/关键场次	无安排	偶尔	球迷组织活动	否	3	3	4	9	9	8	26
502	有倦怠	中度倦怠	<30岁	住院医师	2-5年	50-60h	≤4次	三甲医院	大型	中部	<1h	否	是	否	是	否	否	短视频片段	主要看中国队比赛	通过集锦了解	无安排	偶尔	与同事/朋友	否	4	3	3	11	4	15	30
503	有倦怠	中度倦怠	<30岁	住院医师	2-5年	61-70h	≥9次	三甲医院	大型	中部	<1h	是	否	否	否	否	否	直播	偶尔看看	全程跟踪重要比赛	无安排	偶尔	与同事/朋友	否	3	3	3	10	12	8	30
504	无倦怠		40-44岁	副主任医师	>5年	50-60h	≤4次	非三甲医院	中型	中部	3-5h	是	否	否	否	否	是	直播	每届都看	通过集锦了解	无安排	经常	与同事/朋友	否	3	4	3	6	3	5	14
505	有倦怠	轻度倦怠	30-34岁	主治医师	2-5年	>80h	5-8次	非三甲医院	大型	西部	3-5h	否	是	否	否	否	否	直播	每届都看	只看决赛/关键场次	无安排	偶尔	独自观看	否	4	3	3	8	10	6	24
506	无倦怠		30-34岁	住院医师	<2年	50-60h	≤4次	非三甲医院	中型	西部	<1h	否	是	是	是	是	否	现场/公共场所	每届都看	只看决赛/关键场次	无安排	偶尔	与同事/朋友	是	3	3	2	6	6	2	14
507	有倦怠	中度倦怠	≥45岁	主任医师	>5年	50-60h	5-8次	非三甲医院	小型	中部	>5h	是	否	否	否	否	否	直播	每届都看	只看决赛/关键场次	无安排	经常	与家人	否	4	4	3	10	12	10	32
508	无倦怠		40-44岁	副主任医师	>5年	61-70h	5-8次	三甲医院	大型	西部	3-5h	是	是	否	否	是	否	现场/公共场所	偶尔看看	全程跟踪重要比赛	无安排	偶尔	与同事/朋友	否	3	4	3	7	3	2	12
509	无倦怠		40-44岁	副主任医师	>5年	61-70h	5-8次	三甲医院	大型	西部	3-5h	是	是	否	否	是	否	短视频片段	主要看中国队比赛	只看决赛/关键场次	无安排	偶尔	独自观看	否	3	3	2	7	3	2	12
510	有倦怠	中度倦怠	30-34岁	主治医师	2-5年	61-70h	≥9次	非三甲医院	小型	东部	<1h	是	否	否	否	否	是	短视频片段	每届都看	通过集锦了解	无安排	偶尔	独自观看	否	3	4	2	9	12	11	32
511	有倦怠	中度倦怠	30-34岁	主治医师	2-5年	61-70h	5-8次	三甲医院	大型	中部	3-5h	否	否	是	否	否	否	直播	主要看中国队比赛	只看决赛/关键场次	无安排	偶尔	与家人	否	4	3	4	8	10	16	34
512	有倦怠	轻度倦怠	≥45岁	副主任医师	>5年	61-70h	≥9次	三甲医院	大型	西部	3-5h	是	是	是	否	否	否	短视频片段	基本不看	全程跟踪重要比赛	调班排版	偶尔	独自观看	否	3	3	3	13	7	5	25
513	无倦怠		35-39岁	主治医师	>5年	50-60h	5-8次	三甲医院	大型	西部	3-5h	是	是	是	否	否	否	短视频片段	主要看中国队比赛	只看决赛/关键场次	无安排	偶尔	球迷组织活动	是	3	3	3	5	4	5	14
514	有倦怠	中度倦怠	30-34岁	主治医师	2-5年	71-80h	≥9次	非三甲医院	中型	中部	<1h	否	否	否	否	是	否	短视频片段	基本不看	只看决赛/关键场次	无安排	偶尔	独自观看	否	3	4	3	7	16	9	32
515	无倦怠		35-39岁	主治医师	>5年	50-60h	5-8次	三甲医院	小型	中部	3-5h	否	是	否	否	否	是	直播	每届都看	只看决赛/关键场次	无安排	偶尔	与同事/朋友	否	2	3	2	4	4	2	10
516	有倦怠	轻度倦怠	<30岁	住院医师	<2年	>80h	≥9次	非三甲医院	中型	东部	1-3h	是	否	否	否	是	是	直播	每届都看	只看决赛/关键场次	无安排	偶尔	与同事/朋友	否	3	3	4	7	14	7	28
517	有倦怠	中度倦怠	<30岁	住院医师	<2年	61-70h	≥9次	三甲医院	大型	中部	<1h	否	否	否	否	是	否	现场/公共场所	每届都看	通过集锦了解	无安排	从不	独自观看	是	3	2	2	13	12	13	38
518	有倦怠	中度倦怠	40-44岁	主治医师	>5年	50-60h	≤4次	三甲医院	大型	西部	<1h	否	否	否	否	否	是	图文战报	偶尔看看	通过集锦了解	无安排	偶尔	球迷组织活动	否	2	3	3	7	12	13	32
519	有倦怠	中度倦怠	<30岁	住院医师	<2年	>80h	≥9次	三甲医院	小型	中部	<1h	是	否	是	否	否	否	短视频片段	主要看中国队比赛	只看决赛/关键场次	调班排版	偶尔	独自观看	否	3	3	3	14	8	11	33
520	有倦怠	中度倦怠	40-44岁	主治医师	>5年	50-60h	5-8次	三甲医院	小型	西部	1-3h	是	否	否	否	否	否	短视频片段	每届都看	只看决赛/关键场次	无安排	从不	与家人	否	3	3	3	13	6	12	31
521	有倦怠	中度倦怠	40-44岁	副主任医师	>5年	61-70h	5-8次	三甲医院	大型	东部	<1h	是	否	是	否	否	否	直播	每届都看	全程跟踪重要比赛	无安排	偶尔	独自观看	是	3	4	3	12	12	7	31
522	无倦怠		≥45岁	副主任医师	>5年	50-60h	5-8次	三甲医院	大型	西部	3-5h	是	否	否	否	否	否	图文战报	基本不看	全程跟踪重要比赛	无安排	偶尔	与同事/朋友	是	3	3	2	5	6	3	14
523	有倦怠	轻度倦怠	<30岁	住院医师	<2年	50-60h	≤4次	三甲医院	大型	东北	>5h	否	是	否	是	否	否	直播	每届都看	只看决赛/关键场次	无安排	偶尔	与同事/朋友	否	3	4	3	3	7	10	20
524	有倦怠	轻度倦怠	40-44岁	副主任医师	>5年	61-70h	5-8次	非三甲医院	中型	东部	<1h	否	否	否	是	否	否	直播	每届都看	只看决赛/关键场次	无安排	经常	与家人	是	3	3	2	8	4	13	25
525	有倦怠	轻度倦怠	35-39岁	主治医师	>5年	50-60h	5-8次	三甲医院	大型	东部	<1h	是	是	否	是	否	是	短视频片段	偶尔看看	参与线上讨论	休息区播放	偶尔	独自观看	否	4	4	3	8	5	8	21
526	有倦怠	轻度倦怠	30-34岁	主治医师	2-5年	50-60h	5-8次	非三甲医院	中型	东北	1-3h	否	否	是	否	是	否	直播	偶尔看看	只看决赛/关键场次	无安排	偶尔	独自观看	否	3	3	3	14	8	3	25
527	无倦怠		40-44岁	副主任医师	>5年	50-60h	5-8次	三甲医院	大型	东北	<1h	是	否	否	否	否	否	直播	每届都看	参与线上讨论	无安排	经常	球迷组织活动	否	2	4	3	7	3	4	14
528	有倦怠	轻度倦怠	30-34岁	主治医师	>5年	50-60h	5-8次	非三甲医院	中型	西部	3-5h	否	是	是	否	否	否	直播	主要看中国队比赛	只看决赛/关键场次	无安排	偶尔	球迷组织活动	否	3	2	4	10	5	10	25
529	有倦怠	重度倦怠	35-39岁	主治医师	>5年	50-60h	5-8次	三甲医院	大型	东部	<1h	否	否	否	否	否	是	图文战报	每届都看	只看决赛/关键场次	无安排	偶尔	独自观看	否	2	3	3	9	18	17	44
530	有倦怠	轻度倦怠	40-44岁	副主任医师	>5年	50-60h	≤4次	三甲医院	大型	西部	3-5h	否	否	否	否	是	否	图文战报	每届都看	只看决赛/关键场次	无安排	偶尔	独自观看	否	2	3	3	10	7	8	25
531	有倦怠	中度倦怠	40-44岁	主任医师	>5年	71-80h	≥9次	非三甲医院	小型	中部	3-5h	否	否	否	否	是	否	直播	每届都看	通过集锦了解	无安排	经常	与家人	否	2	4	3	16	12	5	33
532	无倦怠		35-39岁	副主任医师	2-5年	50-60h	5-8次	三甲医院	大型	西部	1-3h	否	否	否	否	否	是	短视频片段	每届都看	全程跟踪重要比赛	无安排	偶尔	独自观看	否	3	3	4	4	4	3	11
533	无倦怠		<30岁	住院医师	2-5年	50-60h	5-8次	非三甲医院	中型	东北	3-5h	否	否	否	否	否	是	现场/公共场所	每届都看	参与线上讨论	调班排版	偶尔	独自观看	否	3	3	3	4	7	3	14
534	有倦怠	轻度倦怠	<30岁	住院医师	<2年	50-60h	5-8次	三甲医院	大型	中部	<1h	否	否	否	否	否	是	短视频片段	每届都看	通过集锦了解	调班排版	偶尔	球迷组织活动	是	4	3	2	9	7	7	23
535	有倦怠	重度倦怠	≥45岁	主任医师	>5年	71-80h	≥9次	三甲医院	中型	东部	1-3h	否	否	否	否	是	否	直播	每届都看	只看决赛/关键场次	无安排	偶尔	独自观看	是	3	4	2	19	15	15	49
536	无倦怠		<30岁	住院医师	<2年	50-60h	≤4次	非三甲医院	小型	西部	3-5h	是	否	否	否	否	否	短视频片段	主要看中国队比赛	全程跟踪重要比赛	无安排	偶尔	独自观看	否	3	3	2	3	5	6	14
537	有倦怠	中度倦怠	40-44岁	副主任医师	>5年	50-60h	5-8次	三甲医院	大型	中部	3-5h	否	是	否	否	是	否	短视频片段	偶尔看看	只看决赛/关键场次	无安排	经常	独自观看	否	2	2	3	12	11	9	32
538	无倦怠		35-39岁	主任医师	2-5年	>80h	≥9次	非三甲医院	小型	中部	3-5h	是	否	是	是	是	否	图文战报	主要看中国队比赛	只看决赛/关键场次	无安排	偶尔	独自观看	否	2	2	3	5	3	6	14
539	有倦怠	轻度倦怠	30-34岁	主治医师	>5年	71-80h	≥9次	三甲医院	大型	东部	1-3h	否	是	否	否	是	否	短视频片段	每届都看	全程跟踪重要比赛	无安排	从不	与家人	是	3	3	3	11	8	6	25
540	有倦怠	中度倦怠	<30岁	住院医师	<2年	61-70h	≥9次	三甲医院	大型	东部	3-5h	否	否	否	否	是	否	图文战报	偶尔看看	只看决赛/关键场次	无安排	偶尔	与家人	否	2	4	3	9	8	13	30
541	有倦怠	中度倦怠	30-34岁	主治医师	2-5年	50-60h	5-8次	三甲医院	小型	西部	1-3h	否	是	是	否	是	否	直播	每届都看	通过集锦了解	无安排	偶尔	与同事/朋友	否	3	2	3	12	8	11	31
542	有倦怠	中度倦怠	<30岁	住院医师	<2年	50-60h	≤4次	三甲医院	大型	中部	1-3h	是	否	否	否	是	否	短视频片段	每届都看	参与线上讨论	无安排	从不	与同事/朋友	否	3	3	3	7	10	13	30
543	有倦怠	中度倦怠	35-39岁	副主任医师	>5年	50-60h	5-8次	三甲医院	大型	西部	<1h	否	否	否	否	是	否	现场/公共场所	每届都看	只看决赛/关键场次	休息区播放	偶尔	与家人	否	3	3	3	13	11	7	31
544	有倦怠	中度倦怠	40-44岁	主治医师	>5年	>80h	5-8次	三甲医院	大型	西部	3-5h	否	否	否	是	否	否	直播	主要看中国队比赛	只看决赛/关键场次	无安排	偶尔	与同事/朋友	否	3	3	3	10	11	10	31
545	有倦怠	轻度倦怠	30-34岁	住院医师	<2年	>80h	≥9次	非三甲医院	中型	西部	>5h	否	否	否	是	否	否	短视频片段	基本不看	只看决赛/关键场次	调班排版	偶尔	独自观看	否	3	2	3	4	8	8	20
546	无倦怠		40-44岁	副主任医师	>5年	50-60h	5-8次	三甲医院	大型	东部	3-5h	是	是	否	否	是	是	直播	主要看中国队比赛	只看决赛/关键场次	无安排	经常	独自观看	否	3	3	3	4	4	4	12
547	无倦怠		30-34岁	主治医师	2-5年	50-60h	≤4次	三甲医院	中型	东北	1-3h	是	否	否	是	是	否	直播	每届都看	只看决赛/关键场次	无安排	偶尔	与同事/朋友	是	2	3	3	4	3	0	7
548	有倦怠	轻度倦怠	35-39岁	主治医师	>5年	50-60h	5-8次	非三甲医院	中型	东北	<1h	是	否	否	否	否	否	直播	主要看中国队比赛	参与线上讨论	无安排	偶尔	球迷组织活动	否	3	2	3	6	6	6	18
549	有倦怠	轻度倦怠	40-44岁	副主任医师	>5年	50-60h	≤4次	三甲医院	大型	西部	3-5h	是	是	否	否	是	否	短视频片段	主要看中国队比赛	全程跟踪重要比赛	无安排	偶尔	球迷组织活动	否	3	3	3	7	13	7	27
550	有倦怠	轻度倦怠	<30岁	住院医师	<2年	71-80h	≥9次	三甲医院	大型	西部	3-5h	是	是	否	否	否	否	直播	主要看中国队比赛	全程跟踪重要比赛	休息区播放	偶尔	独自观看	否	4	4	3	5	10	5	20
551	无倦怠		35-39岁	主治医师	>5年	61-70h	5-8次	三甲医院	小型	中部	3-5h	否	否	否	否	否	是	直播	偶尔看看	全程跟踪重要比赛	调班排版	从不	独自观看	否	3	3	3	6	6	1	13
552	有倦怠	轻度倦怠	30-34岁	住院医师	<2年	61-70h	≥9次	三甲医院	大型	西部	>5h	否	否	否	否	否	是	直播	基本不看	只看决赛/关键场次	无安排	经常	与家人	否	3	2	3	7	6	5	18
553	有倦怠	重度倦怠	<30岁	住院医师	<2年	50-60h	5-8次	非三甲医院	中型	东部	1-3h	否	否	是	否	否	否	直播	每届都看	全程跟踪重要比赛	休息区播放	经常	球迷组织活动	否	3	3	3	17	17	10	44
554	有倦怠	中度倦怠	≥45岁	副主任医师	>5年	50-60h	≤4次	非三甲医院	小型	东北	<1h	否	否	是	否	否	否	短视频片段	每届都看	只看决赛/关键场次	调班排版	偶尔	独自观看	否	3	4	3	10	9	11	30
555	无倦怠		35-39岁	副主任医师	2-5年	50-60h	≥9次	三甲医院	大型	东北	>5h	否	否	是	否	否	否	图文战报	偶尔看看	全程跟踪重要比赛	无安排	经常	独自观看	否	2	4	3	4	4	6	14
556	有倦怠	轻度倦怠	≥45岁	主任医师	>5年	>80h	5-8次	非三甲医院	大型	东北	3-5h	否	否	否	否	否	是	短视频片段	基本不看	只看决赛/关键场次	无安排	偶尔	独自观看	否	3	4	3	4	10	14	28
557	无倦怠		35-39岁	主治医师	2-5年	50-60h	5-8次	非三甲医院	中型	东部	3-5h	否	是	否	否	否	是	短视频片段	主要看中国队比赛	只看决赛/关键场次	无安排	从不	与家人	是	2	4	4	5	5	2	12
558	无倦怠		≥45岁	主任医师	>5年	50-60h	5-8次	三甲医院	小型	中部	3-5h	是	是	否	是	是	否	图文战报	主要看中国队比赛	只看决赛/关键场次	无安排	偶尔	独自观看	否	3	2	3	4	3	6	13
559	无倦怠		30-34岁	主治医师	2-5年	50-60h	5-8次	非三甲医院	小型	东北	<1h	是	否	是	否	否	否	短视频片段	每届都看	只看决赛/关键场次	无安排	偶尔	独自观看	否	4	2	3	5	3	1	9
560	有倦怠	轻度倦怠	<30岁	住院医师	<2年	50-60h	≤4次	三甲医院	大型	中部	3-5h	否	否	是	否	否	否	直播	基本不看	全程跟踪重要比赛	调班排版	偶尔	与同事/朋友	是	4	2	3	11	9	5	25
561	有倦怠	轻度倦怠	35-39岁	主治医师	>5年	>80h	5-8次	非三甲医院	中型	中部	3-5h	是	是	否	否	否	否	短视频片段	基本不看	只看决赛/关键场次	无安排	偶尔	与家人	否	4	3	3	13	7	3	23
562	有倦怠	重度倦怠	40-44岁	主治医师	>5年	50-60h	5-8次	三甲医院	大型	东部	3-5h	是	是	否	否	是	否	直播	每届都看	只看决赛/关键场次	无安排	经常	与同事/朋友	否	3	3	3	14	19	11	44
563	无倦怠		40-44岁	副主任医师	>5年	50-60h	5-8次	非三甲医院	中型	西部	1-3h	否	是	否	是	否	否	直播	每届都看	只看决赛/关键场次	无安排	偶尔	独自观看	否	3	3	3	3	3	6	12
564	有倦怠	轻度倦怠	<30岁	住院医师	<2年	50-60h	5-8次	三甲医院	大型	西部	3-5h	是	是	否	否	是	否	直播	每届都看	参与线上讨论	无安排	偶尔	球迷组织活动	否	3	3	3	6	4	6	16
565	有倦怠	中度倦怠	30-34岁	主治医师	>5年	>80h	≥9次	三甲医院	大型	中部	<1h	否	否	否	是	是	否	直播	主要看中国队比赛	只看决赛/关键场次	无安排	经常	球迷组织活动	否	3	3	4	10	12	9	31
566	有倦怠	重度倦怠	30-34岁	主治医师	2-5年	50-60h	≤4次	三甲医院	大型	东部	<1h	否	否	否	否	否	是	直播	主要看中国队比赛	只看决赛/关键场次	无安排	偶尔	与家人	否	2	3	3	18	14	12	44
567	无倦怠		35-39岁	主治医师	>5年	50-60h	≥9次	三甲医院	大型	中部	3-5h	否	否	是	否	是	是	直播	每届都看	全程跟踪重要比赛	无安排	经常	独自观看	否	3	2	3	4	6	2	12
568	有倦怠	轻度倦怠	35-39岁	主治医师	>5年	50-60h	5-8次	三甲医院	大型	西部	1-3h	是	否	否	否	是	否	现场/公共场所	主要看中国队比赛	只看决赛/关键场次	调班排版	经常	独自观看	否	3	3	3	10	7	8	25
569	无倦怠		40-44岁	副主任医师	>5年	71-80h	5-8次	非三甲医院	小型	东部	<1h	是	是	否	否	是	否	直播	主要看中国队比赛	只看决赛/关键场次	无安排	偶尔	与家人	是	4	3	2	5	3	0	8
570	有倦怠	中度倦怠	≥45岁	副主任医师	>5年	50-60h	5-8次	非三甲医院	小型	东部	1-3h	否	否	否	否	是	否	直播	每届都看	只看决赛/关键场次	无安排	偶尔	独自观看	否	3	3	3	11	8	14	33
571	有倦怠	轻度倦怠	30-34岁	主治医师	2-5年	71-80h	≥9次	三甲医院	大型	东部	<1h	是	是	否	否	否	是	短视频片段	主要看中国队比赛	只看决赛/关键场次	无安排	从不	独自观看	否	4	4	2	8	13	7	28
572	有倦怠	轻度倦怠	30-34岁	主治医师	2-5年	<50h	≤4次	三甲医院	大型	中部	<1h	否	是	是	否	否	否	现场/公共场所	基本不看	只看决赛/关键场次	无安排	从不	与家人	否	2	3	3	13	7	5	25
573	无倦怠		35-39岁	副主任医师	2-5年	61-70h	5-8次	三甲医院	大型	中部	<1h	是	是	否	否	否	否	直播	每届都看	全程跟踪重要比赛	无安排	偶尔	独自观看	是	3	3	2	3	4	6	13
574	无倦怠		30-34岁	副主任医师	2-5年	61-70h	≥9次	三甲医院	大型	西部	3-5h	是	否	否	否	否	否	直播	主要看中国队比赛	只看决赛/关键场次	无安排	经常	球迷组织活动	否	4	3	3	6	4	4	14
575	无倦怠		≥45岁	主任医师	>5年	50-60h	5-8次	非三甲医院	大型	东北	<1h	是	是	否	是	是	否	现场/公共场所	主要看中国队比赛	只看决赛/关键场次	无安排	偶尔	与同事/朋友	否	2	3	3	5	3	1	9
576	有倦怠	轻度倦怠	40-44岁	副主任医师	>5年	50-60h	≤4次	非三甲医院	小型	西部	3-5h	否	否	否	否	是	否	直播	主要看中国队比赛	只看决赛/关键场次	无安排	偶尔	与家人	否	2	4	4	4	10	6	20
577	有倦怠	中度倦怠	35-39岁	主治医师	>5年	50-60h	5-8次	三甲医院	大型	西部	1-3h	是	否	否	否	否	否	直播	偶尔看看	只看决赛/关键场次	无安排	从不	与同事/朋友	否	3	3	4	11	8	11	30
578	有倦怠	中度倦怠	40-44岁	副主任医师	>5年	50-60h	≤4次	非三甲医院	中型	东北	1-3h	否	否	是	是	否	否	短视频片段	主要看中国队比赛	参与线上讨论	无安排	从不	球迷组织活动	否	3	2	3	15	11	5	31
579	无倦怠		≥45岁	主任医师	>5年	50-60h	≤4次	非三甲医院	中型	中部	1-3h	是	是	否	否	否	否	直播	偶尔看看	全程跟踪重要比赛	无安排	偶尔	球迷组织活动	是	4	2	4	4	3	2	9
580	有倦怠	中度倦怠	30-34岁	主治医师	>5年	50-60h	≤4次	非三甲医院	中型	中部	1-3h	否	是	否	否	是	否	直播	偶尔看看	全程跟踪重要比赛	无安排	偶尔	与同事/朋友	是	3	3	3	12	12	7	31
581	有倦怠	中度倦怠	30-34岁	主治医师	2-5年	71-80h	≥9次	三甲医院	大型	东部	<1h	是	否	否	否	否	否	短视频片段	每届都看	通过集锦了解	无安排	偶尔	球迷组织活动	否	4	3	3	6	15	11	32
582	无倦怠		40-44岁	副主任医师	>5年	50-60h	5-8次	三甲医院	小型	中部	3-5h	是	是	是	否	否	是	短视频片段	主要看中国队比赛	只看决赛/关键场次	无安排	从不	独自观看	否	3	3	2	3	4	6	13
583	无倦怠		30-34岁	副主任医师	2-5年	50-60h	≥9次	三甲医院	大型	东北	>5h	是	是	否	否	是	否	短视频片段	每届都看	只看决赛/关键场次	无安排	偶尔	独自观看	否	3	4	2	5	7	2	14
584	无倦怠		35-39岁	主治医师	2-5年	50-60h	≤4次	非三甲医院	中型	西部	<1h	否	是	否	否	否	否	短视频片段	每届都看	只看决赛/关键场次	无安排	偶尔	与家人	否	2	3	4	4	5	3	12
585	有倦怠	轻度倦怠	40-44岁	副主任医师	>5年	50-60h	≤4次	三甲医院	大型	东部	<1h	是	是	否	否	否	是	短视频片段	主要看中国队比赛	只看决赛/关键场次	无安排	偶尔	与同事/朋友	否	3	2	3	8	9	5	22
586	无倦怠		35-39岁	主治医师	>5年	50-60h	≥9次	三甲医院	大型	中部	3-5h	否	否	是	否	是	是	直播	每届都看	只看决赛/关键场次	无安排	经常	与同事/朋友	是	4	3	3	4	6	2	12
587	有倦怠	轻度倦怠	40-44岁	副主任医师	>5年	>80h	≥9次	三甲医院	大型	中部	>5h	是	是	否	否	否	否	短视频片段	每届都看	全程跟踪重要比赛	无安排	偶尔	独自观看	否	3	2	3	10	12	5	27
588	无倦怠		<30岁	住院医师	2-5年	50-60h	5-8次	非三甲医院	中型	东北	3-5h	否	否	否	否	否	是	现场/公共场所	每届都看	只看决赛/关键场次	无安排	偶尔	独自观看	是	3	3	2	4	7	3	14
589	有倦怠	重度倦怠	30-34岁	主治医师	2-5年	50-60h	5-8次	非三甲医院	中型	中部	>5h	是	否	否	否	否	否	图文战报	偶尔看看	通过集锦了解	无安排	从不	与同事/朋友	否	3	3	3	13	15	14	42
590	有倦怠	中度倦怠	35-39岁	副主任医师	>5年	50-60h	5-8次	非三甲医院	中型	西部	<1h	是	否	否	否	否	否	直播	每届都看	全程跟踪重要比赛	无安排	经常	独自观看	否	4	3	3	13	10	7	30
591	有倦怠	轻度倦怠	35-39岁	主治医师	>5年	50-60h	5-8次	非三甲医院	中型	西部	3-5h	否	否	否	否	否	是	短视频片段	偶尔看看	只看决赛/关键场次	无安排	偶尔	与同事/朋友	否	3	2	3	7	6	13	26
592	有倦怠	轻度倦怠	40-44岁	副主任医师	>5年	71-80h	5-8次	非三甲医院	中型	西部	>5h	否	是	否	是	是	否	短视频片段	主要看中国队比赛	只看决赛/关键场次	无安排	经常	独自观看	否	2	3	2	8	7	11	26
593	有倦怠	重度倦怠	<30岁	住院医师	<2年	<50h	≤4次	三甲医院	大型	中部	>5h	否	否	否	是	否	否	短视频片段	基本不看	只看决赛/关键场次	无安排	经常	与同事/朋友	否	2	3	3	16	16	15	47
594	无倦怠		≥45岁	副主任医师	>5年	61-70h	5-8次	非三甲医院	小型	中部	3-5h	否	是	否	否	是	是	直播	每届都看	通过集锦了解	无安排	偶尔	独自观看	否	3	3	4	5	4	5	14
595	有倦怠	轻度倦怠	<30岁	住院医师	<2年	71-80h	≥9次	三甲医院	大型	东部	1-3h	是	否	否	否	是	是	短视频片段	主要看中国队比赛	全程跟踪重要比赛	无安排	经常	与家人	否	3	4	3	7	12	5	24
596	有倦怠	轻度倦怠	30-34岁	主治医师	2-5年	71-80h	≥9次	三甲医院	大型	中部	<1h	是	否	否	否	是	否	现场/公共场所	每届都看	只看决赛/关键场次	无安排	偶尔	与同事/朋友	否	2	3	3	6	10	3	19
597	无倦怠		30-34岁	主治医师	2-5年	61-70h	5-8次	三甲医院	大型	中部	<1h	是	是	否	否	是	否	短视频片段	基本不看	只看决赛/关键场次	休息区播放	偶尔	与同事/朋友	是	3	3	4	3	4	5	12
598	有倦怠	中度倦怠	40-44岁	副主任医师	>5年	50-60h	5-8次	非三甲医院	中型	东部	3-5h	是	否	是	否	否	否	现场/公共场所	每届都看	全程跟踪重要比赛	无安排	偶尔	独自观看	否	3	3	3	14	8	9	31
599	有倦怠	中度倦怠	30-34岁	主治医师	2-5年	71-80h	≥9次	三甲医院	大型	东部	<1h	否	否	否	否	否	是	直播	每届都看	只看决赛/关键场次	无安排	偶尔	与家人	否	3	3	3	14	8	11	33
600	无倦怠		35-39岁	主治医师	2-5年	50-60h	≤4次	三甲医院	大型	中部	3-5h	否	否	否	否	是	否	图文战报	每届都看	通过集锦了解	无安排	从不	独自观看	否	3	2	3	5	4	5	14
601	有倦怠	轻度倦怠	30-34岁	主治医师	2-5年	>80h	5-8次	三甲医院	大型	中部	1-3h	是	是	是	否	否	否	直播	基本不看	全程跟踪重要比赛	无安排	偶尔	与同事/朋友	否	2	4	3	8	8	8	24
602	有倦怠	重度倦怠	35-39岁	主治医师	>5年	50-60h	≤4次	非三甲医院	中型	东部	1-3h	否	是	否	是	是	否	现场/公共场所	偶尔看看	只看决赛/关键场次	无安排	经常	独自观看	否	4	3	3	15	12	16	43
603	有倦怠	轻度倦怠	40-44岁	副主任医师	>5年	61-70h	≥9次	三甲医院	大型	东北	<1h	是	是	否	否	否	是	直播	主要看中国队比赛	只看决赛/关键场次	无安排	偶尔	球迷组织活动	否	3	3	3	8	6	7	21
604	有倦怠	中度倦怠	40-44岁	副主任医师	>5年	61-70h	≥9次	三甲医院	中型	中部	3-5h	是	否	否	否	否	否	短视频片段	每届都看	通过集锦了解	无安排	偶尔	与家人	否	3	2	3	7	14	10	31
605	有倦怠	轻度倦怠	40-44岁	副主任医师	>5年	50-60h	5-8次	三甲医院	大型	西部	>5h	否	是	否	否	否	否	直播	主要看中国队比赛	只看决赛/关键场次	无安排	偶尔	与家人	否	3	3	3	10	8	5	23
606	无倦怠		35-39岁	主任医师	>5年	<50h	≤4次	非三甲医院	中型	东部	3-5h	是	否	是	是	是	否	短视频片段	每届都看	参与线上讨论	无安排	偶尔	独自观看	否	2	4	3	3	3	5	11
607	有倦怠	轻度倦怠	40-44岁	副主任医师	>5年	>80h	≥9次	三甲医院	大型	西部	3-5h	否	是	否	是	否	否	短视频片段	主要看中国队比赛	只看决赛/关键场次	休息区播放	偶尔	独自观看	否	3	3	3	11	10	6	27
608	有倦怠	中度倦怠	≥45岁	主任医师	>5年	61-70h	5-8次	三甲医院	小型	东部	<1h	否	否	否	是	否	否	直播	每届都看	通过集锦了解	无安排	偶尔	与家人	否	3	2	2	10	10	11	31
609	无倦怠		35-39岁	主治医师	2-5年	61-70h	5-8次	三甲医院	大型	西部	1-3h	否	是	否	否	是	否	现场/公共场所	基本不看	只看决赛/关键场次	无安排	偶尔	独自观看	否	3	3	3	6	4	4	14
610	有倦怠	轻度倦怠	30-34岁	主治医师	2-5年	50-60h	≤4次	非三甲医院	中型	中部	1-3h	是	否	是	否	否	否	直播	每届都看	只看决赛/关键场次	无安排	偶尔	与家人	否	2	3	3	10	11	6	27
611	有倦怠	中度倦怠	30-34岁	主治医师	2-5年	61-70h	5-8次	三甲医院	大型	西部	1-3h	否	否	否	否	否	是	直播	每届都看	只看决赛/关键场次	无安排	偶尔	与同事/朋友	否	2	3	3	17	10	5	32
612	无倦怠		35-39岁	主治医师	>5年	50-60h	5-8次	三甲医院	大型	中部	<1h	否	否	否	否	否	是	短视频片段	主要看中国队比赛	只看决赛/关键场次	休息区播放	偶尔	独自观看	否	4	3	3	6	4	2	12
613	有倦怠	轻度倦怠	40-44岁	副主任医师	>5年	50-60h	≥9次	三甲医院	大型	中部	3-5h	是	是	否	否	否	否	直播	每届都看	只看决赛/关键场次	休息区播放	偶尔	与同事/朋友	否	3	3	2	12	8	5	25
614	无倦怠		40-44岁	主治医师	>5年	50-60h	5-8次	三甲医院	大型	中部	3-5h	是	否	是	否	否	否	直播	偶尔看看	只看决赛/关键场次	休息区播放	偶尔	独自观看	否	2	3	2	5	3	6	14
615	有倦怠	中度倦怠	30-34岁	主治医师	2-5年	50-60h	≤4次	三甲医院	大型	中部	1-3h	否	是	是	否	否	否	短视频片段	主要看中国队比赛	全程跟踪重要比赛	调班排版	偶尔	独自观看	是	3	3	2	8	11	10	29
616	无倦怠		30-34岁	住院医师	<2年	50-60h	5-8次	三甲医院	大型	东北	<1h	是	否	否	否	否	否	短视频片段	偶尔看看	只看决赛/关键场次	无安排	偶尔	独自观看	是	3	2	3	4	3	2	9
617	有倦怠	轻度倦怠	35-39岁	主治医师	>5年	>80h	≥9次	三甲医院	大型	中部	3-5h	是	是	否	否	是	否	图文战报	每届都看	通过集锦了解	无安排	经常	独自观看	否	3	2	3	10	10	3	23
618	有倦怠	中度倦怠	35-39岁	主治医师	>5年	50-60h	≤4次	非三甲医院	大型	西部	<1h	否	否	是	否	是	否	短视频片段	主要看中国队比赛	全程跟踪重要比赛	休息区播放	偶尔	球迷组织活动	否	2	3	4	8	11	14	33
619	有倦怠	轻度倦怠	≥45岁	主任医师	>5年	61-70h	5-8次	三甲医院	大型	西部	>5h	是	是	是	否	否	否	直播	每届都看	只看决赛/关键场次	无安排	偶尔	与家人	否	2	2	4	8	9	10	27
620	有倦怠	中度倦怠	35-39岁	主治医师	>5年	50-60h	5-8次	三甲医院	大型	中部	1-3h	否	否	否	否	是	否	短视频片段	每届都看	只看决赛/关键场次	无安排	偶尔	与家人	否	4	3	4	11	9	12	32
621	有倦怠	重度倦怠	35-39岁	主治医师	>5年	50-60h	5-8次	非三甲医院	小型	东部	<1h	是	是	是	否	否	否	短视频片段	主要看中国队比赛	只看决赛/关键场次	无安排	偶尔	独自观看	否	3	3	3	15	13	15	43
622	有倦怠	中度倦怠	30-34岁	主治医师	2-5年	50-60h	5-8次	三甲医院	小型	中部	<1h	是	否	是	否	否	否	短视频片段	每届都看	只看决赛/关键场次	休息区播放	经常	与同事/朋友	否	3	3	3	5	16	10	31
623	无倦怠		<30岁	住院医师	<2年	>80h	5-8次	三甲医院	中型	中部	3-5h	否	否	否	否	否	是	直播	主要看中国队比赛	只看决赛/关键场次	无安排	偶尔	独自观看	否	3	3	3	4	6	2	12
624	无倦怠		40-44岁	主治医师	>5年	61-70h	5-8次	三甲医院	大型	西部	1-3h	否	否	否	否	否	是	短视频片段	主要看中国队比赛	只看决赛/关键场次	无安排	经常	独自观看	否	2	4	4	6	5	2	13
625	有倦怠	中度倦怠	35-39岁	主治医师	2-5年	<50h	≤4次	三甲医院	大型	西部	1-3h	否	否	否	否	否	是	现场/公共场所	每届都看	全程跟踪重要比赛	无安排	偶尔	与同事/朋友	否	3	3	3	13	11	6	30
626	无倦怠		35-39岁	主治医师	2-5年	50-60h	5-8次	三甲医院	大型	西部	3-5h	是	是	否	是	是	是	直播	每届都看	只看决赛/关键场次	无安排	从不	独自观看	否	3	3	3	4	3	6	13
627	无倦怠		≥45岁	副主任医师	>5年	<50h	≥9次	非三甲医院	中型	西部	<1h	否	否	否	否	是	否	直播	每届都看	只看决赛/关键场次	无安排	偶尔	独自观看	否	2	3	4	5	3	2	10
628	无倦怠		30-34岁	副主任医师	2-5年	50-60h	≤4次	非三甲医院	小型	东北	3-5h	是	是	否	否	否	是	直播	每届都看	通过集锦了解	无安排	从不	独自观看	否	3	3	3	5	4	5	14
629	有倦怠	轻度倦怠	≥45岁	主任医师	>5年	71-80h	≥9次	非三甲医院	中型	东部	3-5h	否	是	是	否	是	否	直播	主要看中国队比赛	全程跟踪重要比赛	无安排	偶尔	独自观看	否	4	3	3	4	9	5	18
630	有倦怠	轻度倦怠	≥45岁	主任医师	>5年	50-60h	5-8次	非三甲医院	中型	西部	1-3h	否	否	否	否	否	是	现场/公共场所	每届都看	只看决赛/关键场次	无安排	偶尔	独自观看	否	3	3	2	10	7	10	27
631	有倦怠	轻度倦怠	35-39岁	主治医师	>5年	>80h	≥9次	非三甲医院	中型	东北	<1h	是	否	是	否	否	否	直播	偶尔看看	只看决赛/关键场次	调班排版	经常	独自观看	否	4	3	3	8	8	8	24
632	无倦怠		30-34岁	住院医师	<2年	50-60h	≤4次	非三甲医院	中型	西部	<1h	否	是	是	是	是	否	直播	主要看中国队比赛	只看决赛/关键场次	无安排	偶尔	独自观看	否	2	3	4	6	6	2	14
633	无倦怠		40-44岁	副主任医师	>5年	71-80h	≥9次	三甲医院	中型	中部	3-5h	是	否	是	否	是	否	直播	每届都看	全程跟踪重要比赛	无安排	偶尔	独自观看	是	3	3	3	3	3	2	8
634	无倦怠		40-44岁	主任医师	>5年	61-70h	5-8次	三甲医院	大型	东北	<1h	是	是	否	否	是	否	短视频片段	基本不看	只看决赛/关键场次	无安排	偶尔	独自观看	否	3	3	3	4	3	2	9
635	有倦怠	轻度倦怠	35-39岁	主治医师	>5年	50-60h	5-8次	三甲医院	大型	中部	3-5h	否	否	否	是	否	否	直播	每届都看	只看决赛/关键场次	无安排	偶尔	与家人	否	3	3	3	10	8	5	23
636	有倦怠	轻度倦怠	<30岁	住院医师	2-5年	>80h	5-8次	三甲医院	大型	西部	3-5h	否	否	否	否	是	否	短视频片段	主要看中国队比赛	只看决赛/关键场次	休息区播放	偶尔	与同事/朋友	否	4	2	2	8	12	6	26
637	有倦怠	中度倦怠	40-44岁	副主任医师	>5年	50-60h	≤4次	三甲医院	中型	东部	<1h	否	否	否	否	是	否	短视频片段	主要看中国队比赛	只看决赛/关键场次	无安排	偶尔	与家人	是	3	3	2	13	8	10	31
638	有倦怠	重度倦怠	30-34岁	主治医师	2-5年	71-80h	≥9次	三甲医院	大型	中部	<1h	否	否	否	否	是	否	直播	每届都看	参与线上讨论	调班排版	偶尔	独自观看	否	3	3	4	14	13	15	42
639	无倦怠		35-39岁	主治医师	2-5年	50-60h	5-8次	非三甲医院	中型	中部	<1h	是	是	否	否	是	是	短视频片段	主要看中国队比赛	参与线上讨论	无安排	偶尔	与同事/朋友	否	3	2	3	4	3	6	13
640	有倦怠	轻度倦怠	<30岁	住院医师	<2年	61-70h	5-8次	三甲医院	大型	东部	1-3h	是	是	否	否	是	是	短视频片段	主要看中国队比赛	只看决赛/关键场次	无安排	偶尔	与同事/朋友	是	3	3	4	4	11	5	20
641	有倦怠	轻度倦怠	40-44岁	副主任医师	>5年	50-60h	≤4次	三甲医院	小型	西部	1-3h	是	否	否	否	是	否	直播	偶尔看看	全程跟踪重要比赛	无安排	从不	独自观看	否	3	4	3	12	9	6	27
642	有倦怠	中度倦怠	40-44岁	副主任医师	>5年	>80h	≥9次	非三甲医院	中型	东北	<1h	否	否	否	否	否	是	短视频片段	基本不看	全程跟踪重要比赛	休息区播放	偶尔	独自观看	是	3	3	2	13	9	9	31
643	无倦怠		<30岁	住院医师	2-5年	50-60h	5-8次	三甲医院	大型	中部	3-5h	否	否	否	否	否	是	直播	主要看中国队比赛	参与线上讨论	无安排	偶尔	与同事/朋友	否	2	3	4	4	3	2	9
644	无倦怠		≥45岁	副主任医师	>5年	<50h	≤4次	非三甲医院	小型	东部	3-5h	否	否	否	否	否	是	直播	每届都看	全程跟踪重要比赛	调班排版	经常	独自观看	否	2	2	3	4	7	3	14
645	有倦怠	轻度倦怠	35-39岁	主治医师	>5年	50-60h	≤4次	三甲医院	中型	西部	1-3h	是	是	是	否	是	否	短视频片段	主要看中国队比赛	通过集锦了解	无安排	从不	与家人	否	4	3	3	6	9	5	20
646	有倦怠	中度倦怠	<30岁	住院医师	<2年	50-60h	5-8次	三甲医院	大型	东部	3-5h	否	是	否	否	否	是	短视频片段	主要看中国队比赛	全程跟踪重要比赛	无安排	偶尔	独自观看	否	3	3	3	8	10	12	30
647	有倦怠	轻度倦怠	35-39岁	主治医师	>5年	<50h	≤4次	非三甲医院	小型	中部	1-3h	是	否	否	是	否	否	直播	偶尔看看	只看决赛/关键场次	无安排	从不	独自观看	否	3	3	4	5	12	11	28
648	无倦怠		35-39岁	主治医师	2-5年	>80h	≥9次	非三甲医院	小型	东部	3-5h	否	否	否	否	是	是	短视频片段	每届都看	全程跟踪重要比赛	无安排	偶尔	与家人	否	3	3	3	6	3	3	12
649	无倦怠		30-34岁	住院医师	2-5年	61-70h	≥9次	非三甲医院	中型	中部	3-5h	是	是	否	否	否	是	图文战报	每届都看	只看决赛/关键场次	无安排	偶尔	与同事/朋友	否	3	3	3	4	8	2	14
650	无倦怠		40-44岁	副主任医师	>5年	50-60h	5-8次	三甲医院	小型	中部	3-5h	是	是	否	否	否	否	直播	基本不看	全程跟踪重要比赛	无安排	偶尔	与家人	否	3	4	3	4	7	3	14
651	无倦怠		≥45岁	副主任医师	>5年	61-70h	5-8次	三甲医院	大型	中部	3-5h	否	否	否	否	是	否	直播	每届都看	参与线上讨论	无安排	偶尔	独自观看	否	3	4	3	6	6	2	14
652	有倦怠	中度倦怠	30-34岁	主治医师	2-5年	61-70h	5-8次	三甲医院	大型	东部	<1h	否	否	否	否	是	否	直播	偶尔看看	全程跟踪重要比赛	无安排	偶尔	独自观看	否	3	3	3	9	9	11	29
653	有倦怠	轻度倦怠	40-44岁	主治医师	>5年	50-60h	≤4次	三甲医院	大型	西部	1-3h	是	是	是	否	否	否	短视频片段	每届都看	通过集锦了解	无安排	偶尔	独自观看	否	3	2	3	7	9	10	26
654	有倦怠	重度倦怠	35-39岁	主治医师	>5年	71-80h	≥9次	非三甲医院	中型	东北	<1h	否	否	否	是	是	否	图文战报	每届都看	只看决赛/关键场次	无安排	偶尔	球迷组织活动	是	3	3	3	15	15	15	45
655	无倦怠		35-39岁	主治医师	2-5年	<50h	≤4次	三甲医院	大型	中部	1-3h	是	是	是	否	否	否	直播	每届都看	参与线上讨论	无安排	偶尔	与家人	是	3	3	3	5	4	5	14
656	有倦怠	中度倦怠	<30岁	住院医师	<2年	<50h	≤4次	非三甲医院	小型	西部	<1h	否	否	否	否	否	是	现场/公共场所	基本不看	只看决赛/关键场次	无安排	偶尔	独自观看	否	3	4	3	5	14	12	31
657	有倦怠	中度倦怠	40-44岁	副主任医师	>5年	61-70h	≥9次	非三甲医院	小型	东北	<1h	否	是	否	否	否	否	短视频片段	主要看中国队比赛	只看决赛/关键场次	无安排	偶尔	独自观看	是	4	3	4	11	10	10	31
658	无倦怠		35-39岁	主任医师	>5年	50-60h	5-8次	非三甲医院	大型	西部	3-5h	是	是	否	否	是	否	短视频片段	主要看中国队比赛	只看决赛/关键场次	休息区播放	偶尔	与同事/朋友	否	3	3	3	6	5	1	12
659	有倦怠	中度倦怠	30-34岁	主治医师	2-5年	61-70h	5-8次	三甲医院	大型	中部	<1h	否	是	是	否	是	否	直播	每届都看	全程跟踪重要比赛	无安排	从不	独自观看	否	3	4	3	10	11	9	30
660	无倦怠		30-34岁	主治医师	2-5年	50-60h	5-8次	非三甲医院	小型	东北	<1h	是	否	是	否	否	否	直播	每届都看	只看决赛/关键场次	无安排	偶尔	独自观看	否	4	4	3	5	3	1	9
661	有倦怠	中度倦怠	≥45岁	主任医师	>5年	71-80h	5-8次	三甲医院	大型	中部	<1h	是	否	否	否	否	否	直播	每届都看	参与线上讨论	无安排	偶尔	独自观看	是	3	3	3	11	11	10	32
662	无倦怠		<30岁	住院医师	<2年	50-60h	5-8次	非三甲医院	中型	西部	1-3h	否	是	否	否	否	否	短视频片段	每届都看	只看决赛/关键场次	无安排	从不	与家人	否	3	3	3	5	6	3	14
663	有倦怠	重度倦怠	40-44岁	副主任医师	>5年	50-60h	5-8次	三甲医院	大型	东部	<1h	否	否	否	否	是	否	短视频片段	主要看中国队比赛	只看决赛/关键场次	无安排	偶尔	独自观看	是	3	2	3	16	13	14	43
664	有倦怠	轻度倦怠	35-39岁	副主任医师	2-5年	50-60h	5-8次	三甲医院	大型	东北	1-3h	否	否	否	否	否	是	短视频片段	每届都看	通过集锦了解	无安排	偶尔	与家人	否	3	4	3	12	9	6	27
665	有倦怠	轻度倦怠	<30岁	住院医师	<2年	50-60h	5-8次	三甲医院	大型	西部	3-5h	否	否	是	否	否	否	直播	基本不看	只看决赛/关键场次	无安排	从不	与家人	是	3	3	3	6	4	7	17
666	有倦怠	中度倦怠	<30岁	住院医师	<2年	50-60h	≤4次	三甲医院	大型	西部	3-5h	是	是	否	否	否	是	图文战报	每届都看	只看决赛/关键场次	无安排	偶尔	独自观看	否	3	3	3	12	13	10	35
667	有倦怠	中度倦怠	<30岁	住院医师	<2年	50-60h	5-8次	非三甲医院	中型	东部	<1h	是	否	否	否	否	否	直播	主要看中国队比赛	只看决赛/关键场次	无安排	偶尔	独自观看	是	4	2	3	11	7	11	29
668	有倦怠	中度倦怠	35-39岁	主治医师	>5年	<50h	≤4次	非三甲医院	大型	东部	<1h	否	否	是	否	否	否	短视频片段	每届都看	只看决赛/关键场次	无安排	偶尔	与同事/朋友	否	3	2	3	11	15	6	32
669	有倦怠	轻度倦怠	30-34岁	主治医师	2-5年	50-60h	5-8次	三甲医院	大型	西部	3-5h	否	否	否	否	否	是	直播	每届都看	只看决赛/关键场次	无安排	偶尔	与同事/朋友	否	3	3	3	6	5	11	22
670	有倦怠	轻度倦怠	<30岁	住院医师	<2年	61-70h	5-8次	三甲医院	大型	东部	<1h	是	是	否	否	否	否	短视频片段	每届都看	只看决赛/关键场次	无安排	偶尔	独自观看	否	4	4	3	10	12	6	28
671	无倦怠		<30岁	住院医师	2-5年	50-60h	5-8次	三甲医院	大型	中部	3-5h	否	否	否	否	否	是	现场/公共场所	主要看中国队比赛	全程跟踪重要比赛	无安排	从不	独自观看	否	3	4	3	4	3	2	9
672	有倦怠	中度倦怠	≥45岁	主任医师	>5年	50-60h	≤4次	非三甲医院	小型	西部	<1h	否	否	是	否	否	否	短视频片段	每届都看	全程跟踪重要比赛	无安排	从不	与家人	是	3	3	3	7	13	12	32
673	有倦怠	轻度倦怠	35-39岁	主治医师	>5年	61-70h	5-8次	三甲医院	大型	中部	>5h	是	是	否	否	否	否	图文战报	每届都看	只看决赛/关键场次	无安排	偶尔	球迷组织活动	否	3	3	4	6	12	6	24
674	有倦怠	中度倦怠	40-44岁	副主任医师	>5年	61-70h	≥9次	三甲医院	小型	东部	<1h	否	是	否	否	否	否	短视频片段	基本不看	全程跟踪重要比赛	无安排	偶尔	与家人	否	3	2	3	11	12	10	33
675	有倦怠	轻度倦怠	<30岁	住院医师	<2年	>80h	≥9次	非三甲医院	中型	西部	3-5h	是	是	是	否	否	否	直播	每届都看	只看决赛/关键场次	无安排	经常	独自观看	是	3	3	3	8	10	6	24
676	无倦怠		40-44岁	副主任医师	>5年	61-70h	5-8次	非三甲医院	中型	西部	3-5h	是	是	否	否	是	否	图文战报	主要看中国队比赛	全程跟踪重要比赛	无安排	从不	独自观看	否	4	3	2	4	6	2	12
677	无倦怠		<30岁	住院医师	>5年	>80h	≥9次	非三甲医院	大型	西部	3-5h	否	是	否	否	否	否	直播	每届都看	只看决赛/关键场次	无安排	偶尔	与同事/朋友	否	3	4	4	4	4	3	11
678	无倦怠		35-39岁	主治医师	>5年	61-70h	5-8次	三甲医院	大型	中部	3-5h	否	否	是	否	是	否	直播	每届都看	全程跟踪重要比赛	无安排	经常	与同事/朋友	否	3	4	3	5	4	5	14
679	无倦怠		40-44岁	副主任医师	>5年	61-70h	5-8次	三甲医院	中型	西部	3-5h	否	是	否	是	是	否	短视频片段	主要看中国队比赛	只看决赛/关键场次	无安排	偶尔	独自观看	否	4	4	3	4	7	3	14
680	有倦怠	轻度倦怠	40-44岁	副主任医师	>5年	50-60h	5-8次	非三甲医院	中型	西部	3-5h	是	是	否	否	否	否	短视频片段	每届都看	只看决赛/关键场次	无安排	从不	与同事/朋友	否	3	2	3	11	8	6	25
681	有倦怠	中度倦怠	<30岁	住院医师	<2年	61-70h	5-8次	非三甲医院	小型	东北	<1h	是	否	是	否	是	否	现场/公共场所	每届都看	全程跟踪重要比赛	无安排	偶尔	与同事/朋友	否	3	3	3	7	12	12	31
682	无倦怠		40-44岁	副主任医师	>5年	61-70h	5-8次	三甲医院	大型	中部	3-5h	否	是	否	否	否	是	短视频片段	基本不看	全程跟踪重要比赛	无安排	偶尔	独自观看	否	3	4	2	3	3	5	11
683	无倦怠		30-34岁	副主任医师	>5年	71-80h	5-8次	三甲医院	大型	东部	<1h	是	是	否	是	否	否	现场/公共场所	主要看中国队比赛	只看决赛/关键场次	调班排版	经常	独自观看	否	2	2	3	6	5	3	14
684	有倦怠	轻度倦怠	30-34岁	主治医师	2-5年	50-60h	5-8次	三甲医院	大型	西部	1-3h	是	是	否	否	否	否	短视频片段	主要看中国队比赛	全程跟踪重要比赛	无安排	偶尔	球迷组织活动	是	3	3	4	7	9	2	18
685	有倦怠	轻度倦怠	35-39岁	主治医师	>5年	50-60h	5-8次	三甲医院	大型	东部	<1h	是	是	否	是	是	是	直播	主要看中国队比赛	只看决赛/关键场次	无安排	偶尔	独自观看	否	3	3	3	10	6	7	23
686	有倦怠	轻度倦怠	35-39岁	副主任医师	>5年	71-80h	≥9次	非三甲医院	小型	西部	3-5h	否	是	否	是	是	否	短视频片段	每届都看	只看决赛/关键场次	无安排	偶尔	独自观看	是	3	4	3	9	4	10	23
687	无倦怠		<30岁	住院医师	2-5年	50-60h	≤4次	三甲医院	大型	西部	3-5h	否	是	否	否	否	否	短视频片段	每届都看	只看决赛/关键场次	休息区播放	偶尔	独自观看	否	3	3	2	4	4	5	13
688	无倦怠		40-44岁	副主任医师	>5年	71-80h	5-8次	三甲医院	大型	西部	3-5h	是	否	否	否	是	否	短视频片段	主要看中国队比赛	全程跟踪重要比赛	无安排	从不	独自观看	是	3	3	3	6	6	2	14
689	无倦怠		30-34岁	住院医师	>5年	50-60h	≤4次	三甲医院	大型	中部	3-5h	否	是	否	否	否	否	短视频片段	每届都看	只看决赛/关键场次	无安排	经常	与同事/朋友	否	3	3	3	5	3	2	10
690	有倦怠	中度倦怠	<30岁	住院医师	2-5年	50-60h	5-8次	非三甲医院	中型	西部	>5h	否	否	否	否	否	是	直播	每届都看	只看决赛/关键场次	无安排	经常	独自观看	否	3	3	2	10	14	6	30
691	无倦怠		35-39岁	主治医师	>5年	<50h	≥9次	非三甲医院	小型	东北	<1h	是	是	否	是	否	否	直播	主要看中国队比赛	只看决赛/关键场次	无安排	偶尔	与同事/朋友	否	3	3	3	3	4	5	12
692	有倦怠	轻度倦怠	<30岁	住院医师	2-5年	71-80h	≥9次	非三甲医院	中型	西部	>5h	否	是	否	否	是	否	直播	主要看中国队比赛	全程跟踪重要比赛	无安排	偶尔	独自观看	否	3	3	3	7	11	7	25
693	有倦怠	轻度倦怠	<30岁	住院医师	<2年	71-80h	≥9次	三甲医院	大型	西部	3-5h	否	否	是	否	否	否	直播	每届都看	只看决赛/关键场次	无安排	偶尔	与同事/朋友	是	4	4	3	4	6	5	15
694	无倦怠		30-34岁	住院医师	<2年	61-70h	5-8次	三甲医院	大型	中部	1-3h	是	否	是	否	是	否	短视频片段	每届都看	参与线上讨论	无安排	偶尔	球迷组织活动	否	4	3	3	4	4	4	12
695	有倦怠	轻度倦怠	35-39岁	副主任医师	>5年	61-70h	≥9次	非三甲医院	小型	西部	3-5h	否	否	否	否	否	是	图文战报	基本不看	全程跟踪重要比赛	无安排	偶尔	与家人	是	3	3	3	8	8	8	24
696	有倦怠	重度倦怠	40-44岁	副主任医师	>5年	>80h	≥9次	非三甲医院	中型	东北	1-3h	是	否	否	否	否	否	直播	主要看中国队比赛	全程跟踪重要比赛	无安排	偶尔	与家人	是	3	3	3	16	16	14	46
697	有倦怠	重度倦怠	35-39岁	主治医师	>5年	50-60h	≤4次	非三甲医院	小型	东北	3-5h	否	否	是	是	否	否	直播	基本不看	只看决赛/关键场次	无安排	偶尔	与同事/朋友	否	3	3	3	14	14	15	43
698	有倦怠	轻度倦怠	30-34岁	主治医师	2-5年	50-60h	5-8次	三甲医院	大型	西部	1-3h	是	是	否	否	否	否	直播	偶尔看看	只看决赛/关键场次	无安排	偶尔	独自观看	否	3	3	2	7	10	11	28
699	无倦怠		35-39岁	主治医师	>5年	61-70h	≥9次	非三甲医院	中型	东北	>5h	否	是	否	是	否	否	短视频片段	每届都看	只看决赛/关键场次	无安排	偶尔	独自观看	否	2	2	3	6	5	1	12
700	有倦怠	轻度倦怠	40-44岁	主治医师	>5年	50-60h	5-8次	三甲医院	大型	中部	3-5h	否	否	是	否	否	否	现场/公共场所	主要看中国队比赛	通过集锦了解	无安排	偶尔	与同事/朋友	否	3	3	3	8	8	10	26
701	无倦怠		40-44岁	副主任医师	>5年	50-60h	5-8次	非三甲医院	中型	西部	1-3h	否	是	否	是	否	否	直播	每届都看	只看决赛/关键场次	无安排	从不	独自观看	否	4	2	3	3	3	6	12
702	无倦怠		40-44岁	副主任医师	>5年	71-80h	5-8次	三甲医院	小型	中部	3-5h	否	否	否	否	否	是	直播	每届都看	只看决赛/关键场次	无安排	偶尔	与同事/朋友	否	3	3	4	6	3	3	12
703	无倦怠		30-34岁	主治医师	2-5年	50-60h	5-8次	三甲医院	大型	东北	1-3h	否	否	否	否	是	否	直播	主要看中国队比赛	参与线上讨论	调班排版	偶尔	球迷组织活动	否	3	2	4	4	4	6	14
704	无倦怠		35-39岁	主任医师	>5年	50-60h	5-8次	三甲医院	大型	中部	3-5h	否	否	否	否	否	是	短视频片段	每届都看	只看决赛/关键场次	休息区播放	经常	独自观看	否	3	3	4	4	3	2	9
705	无倦怠		40-44岁	主治医师	>5年	61-70h	5-8次	非三甲医院	小型	西部	<1h	否	是	否	否	否	否	现场/公共场所	每届都看	只看决赛/关键场次	休息区播放	经常	与同事/朋友	否	3	3	3	3	4	1	8
706	有倦怠	轻度倦怠	<30岁	住院医师	<2年	50-60h	5-8次	三甲医院	大型	中部	<1h	否	否	否	否	否	是	短视频片段	主要看中国队比赛	通过集锦了解	无安排	偶尔	与同事/朋友	否	3	3	2	9	9	8	26
707	有倦怠	轻度倦怠	35-39岁	主治医师	>5年	50-60h	5-8次	三甲医院	大型	东部	1-3h	是	否	否	否	否	否	短视频片段	主要看中国队比赛	全程跟踪重要比赛	无安排	经常	与同事/朋友	否	3	3	3	6	9	11	26
708	有倦怠	重度倦怠	<30岁	住院医师	<2年	50-60h	≤4次	三甲医院	大型	东部	<1h	否	否	否	否	否	是	短视频片段	偶尔看看	只看决赛/关键场次	无安排	经常	与家人	否	3	4	3	10	17	18	45
709	有倦怠	中度倦怠	30-34岁	住院医师	<2年	>80h	5-8次	三甲医院	小型	东部	<1h	否	否	否	否	否	是	短视频片段	每届都看	全程跟踪重要比赛	无安排	从不	与同事/朋友	否	3	2	3	7	15	9	31
710	无倦怠		35-39岁	主任医师	2-5年	61-70h	5-8次	三甲医院	中型	中部	<1h	是	是	否	否	是	否	现场/公共场所	每届都看	只看决赛/关键场次	无安排	偶尔	独自观看	否	3	3	3	4	3	5	12
711	有倦怠	轻度倦怠	40-44岁	主治医师	>5年	71-80h	≥9次	三甲医院	大型	东北	>5h	是	是	是	否	是	否	短视频片段	每届都看	只看决赛/关键场次	无安排	偶尔	独自观看	是	3	3	4	8	9	6	23
712	有倦怠	轻度倦怠	35-39岁	主治医师	>5年	50-60h	≤4次	非三甲医院	大型	中部	<1h	是	是	否	否	是	否	直播	每届都看	参与线上讨论	无安排	从不	独自观看	否	3	3	3	9	5	11	25
713	有倦怠	轻度倦怠	40-44岁	副主任医师	>5年	50-60h	5-8次	三甲医院	大型	东北	>5h	是	是	否	是	是	否	现场/公共场所	主要看中国队比赛	只看决赛/关键场次	无安排	偶尔	独自观看	否	2	3	3	14	3	6	23
714	有倦怠	轻度倦怠	30-34岁	主治医师	2-5年	50-60h	5-8次	三甲医院	大型	中部	<1h	是	是	否	否	否	否	短视频片段	每届都看	参与线上讨论	无安排	从不	独自观看	否	3	3	3	9	9	6	24
715	有倦怠	重度倦怠	40-44岁	主任医师	>5年	50-60h	≤4次	三甲医院	大型	东部	<1h	否	否	否	否	是	否	现场/公共场所	每届都看	通过集锦了解	无安排	偶尔	独自观看	否	3	3	3	13	17	18	48
716	有倦怠	中度倦怠	30-34岁	主治医师	>5年	50-60h	5-8次	非三甲医院	中型	西部	3-5h	是	是	是	否	否	否	短视频片段	偶尔看看	全程跟踪重要比赛	无安排	偶尔	与家人	否	4	3	4	9	12	10	31
717	有倦怠	轻度倦怠	35-39岁	副主任医师	>5年	71-80h	≥9次	三甲医院	大型	中部	<1h	否	是	否	否	是	否	现场/公共场所	主要看中国队比赛	只看决赛/关键场次	调班排版	偶尔	独自观看	否	2	4	3	12	8	3	23
718	无倦怠		≥45岁	主治医师	>5年	50-60h	≥9次	三甲医院	大型	中部	3-5h	否	否	否	否	否	是	短视频片段	主要看中国队比赛	全程跟踪重要比赛	无安排	从不	与同事/朋友	否	2	3	2	4	7	3	14
719	有倦怠	重度倦怠	≥45岁	主治医师	>5年	50-60h	5-8次	三甲医院	大型	东部	<1h	是	否	否	否	否	否	短视频片段	基本不看	参与线上讨论	无安排	偶尔	独自观看	否	3	2	3	17	14	11	42
720	有倦怠	轻度倦怠	35-39岁	主治医师	>5年	50-60h	≤4次	三甲医院	大型	东部	<1h	否	否	否	否	是	否	图文战报	每届都看	只看决赛/关键场次	无安排	偶尔	独自观看	否	2	3	3	7	12	5	24
721	有倦怠	轻度倦怠	≥45岁	副主任医师	>5年	50-60h	≤4次	三甲医院	大型	中部	<1h	是	否	否	否	否	是	直播	主要看中国队比赛	参与线上讨论	无安排	偶尔	独自观看	否	3	3	3	7	5	6	18
722	无倦怠		<30岁	住院医师	2-5年	50-60h	5-8次	非三甲医院	中型	东北	<1h	是	是	否	否	否	否	直播	每届都看	只看决赛/关键场次	无安排	偶尔	独自观看	否	3	4	3	5	3	5	13
723	有倦怠	轻度倦怠	30-34岁	主治医师	>5年	61-70h	≥9次	三甲医院	大型	中部	1-3h	是	是	否	否	否	否	直播	每届都看	只看决赛/关键场次	无安排	偶尔	与同事/朋友	否	2	3	3	11	8	6	25
724	有倦怠	中度倦怠	30-34岁	主治医师	2-5年	50-60h	≤4次	三甲医院	中型	西部	1-3h	是	否	否	是	是	否	图文战报	每届都看	全程跟踪重要比赛	无安排	经常	球迷组织活动	是	3	3	2	14	7	10	31
725	无倦怠		≥45岁	副主任医师	>5年	50-60h	≤4次	非三甲医院	小型	西部	3-5h	是	是	否	是	是	否	短视频片段	每届都看	只看决赛/关键场次	休息区播放	偶尔	与家人	否	2	3	3	5	3	5	13
726	有倦怠	中度倦怠	30-34岁	主治医师	2-5年	50-60h	5-8次	非三甲医院	小型	西部	1-3h	是	否	否	否	否	否	短视频片段	基本不看	通过集锦了解	无安排	偶尔	独自观看	否	2	4	3	11	10	10	31
727	有倦怠	重度倦怠	≥45岁	主任医师	>5年	50-60h	5-8次	三甲医院	大型	中部	<1h	是	是	否	否	否	否	直播	每届都看	参与线上讨论	无安排	偶尔	独自观看	否	3	4	4	9	18	17	44
728	有倦怠	中度倦怠	35-39岁	主治医师	>5年	61-70h	5-8次	非三甲医院	中型	中部	<1h	否	是	否	是	否	否	直播	偶尔看看	只看决赛/关键场次	无安排	从不	与家人	否	2	4	4	11	9	10	30
729	无倦怠		40-44岁	主任医师	>5年	61-70h	5-8次	三甲医院	大型	东北	<1h	是	是	否	否	是	否	短视频片段	偶尔看看	全程跟踪重要比赛	无安排	偶尔	独自观看	否	3	2	3	4	3	2	9
730	有倦怠	轻度倦怠	≥45岁	主任医师	>5年	50-60h	5-8次	非三甲医院	小型	东部	<1h	否	是	否	是	是	否	直播	主要看中国队比赛	只看决赛/关键场次	无安排	偶尔	与同事/朋友	否	3	3	3	8	8	7	23
731	有倦怠	轻度倦怠	40-44岁	副主任医师	>5年	50-60h	5-8次	非三甲医院	小型	中部	<1h	否	是	是	否	是	是	现场/公共场所	每届都看	全程跟踪重要比赛	无安排	经常	独自观看	否	4	3	3	9	7	7	23
732	无倦怠		40-44岁	副主任医师	>5年	50-60h	5-8次	三甲医院	大型	西部	1-3h	是	是	否	否	否	是	短视频片段	偶尔看看	全程跟踪重要比赛	无安排	偶尔	与家人	否	3	4	3	3	3	2	8
733	有倦怠	中度倦怠	30-34岁	主治医师	2-5年	50-60h	≤4次	非三甲医院	中型	西部	1-3h	否	否	否	否	是	否	直播	主要看中国队比赛	只看决赛/关键场次	无安排	偶尔	独自观看	否	3	4	3	11	5	16	32
734	无倦怠		30-34岁	住院医师	2-5年	50-60h	5-8次	三甲医院	大型	中部	1-3h	是	否	是	否	否	否	短视频片段	主要看中国队比赛	只看决赛/关键场次	无安排	偶尔	与同事/朋友	否	3	4	2	4	5	1	10
735	有倦怠	轻度倦怠	<30岁	住院医师	2-5年	>80h	≥9次	非三甲医院	中型	东部	>5h	否	否	是	否	是	否	短视频片段	每届都看	通过集锦了解	无安排	偶尔	独自观看	否	4	3	2	8	9	5	22
736	有倦怠	中度倦怠	30-34岁	主治医师	2-5年	50-60h	≤4次	非三甲医院	小型	中部	3-5h	是	否	否	否	否	否	直播	每届都看	只看决赛/关键场次	无安排	偶尔	与同事/朋友	是	3	4	3	9	8	16	33
737	有倦怠	轻度倦怠	<30岁	住院医师	<2年	61-70h	≥9次	三甲医院	小型	中部	<1h	是	否	否	是	否	否	图文战报	主要看中国队比赛	只看决赛/关键场次	无安排	偶尔	独自观看	否	3	3	3	6	9	5	20
738	有倦怠	轻度倦怠	30-34岁	主治医师	>5年	71-80h	5-8次	非三甲医院	小型	东部	<1h	否	否	否	否	否	是	短视频片段	每届都看	全程跟踪重要比赛	无安排	偶尔	独自观看	否	3	3	3	11	8	6	25
739	无倦怠		<30岁	住院医师	2-5年	>80h	≥9次	三甲医院	大型	东部	3-5h	否	是	否	否	否	否	短视频片段	每届都看	只看决赛/关键场次	无安排	偶尔	独自观看	否	3	3	4	6	6	2	14
740	有倦怠	重度倦怠	40-44岁	主治医师	>5年	71-80h	5-8次	非三甲医院	大型	东部	<1h	否	否	否	否	是	否	短视频片段	主要看中国队比赛	全程跟踪重要比赛	无安排	偶尔	与家人	否	3	3	3	13	16	17	46
741	无倦怠		30-34岁	住院医师	2-5年	50-60h	5-8次	三甲医院	中型	中部	3-5h	否	是	否	否	是	是	短视频片段	每届都看	只看决赛/关键场次	无安排	偶尔	与家人	否	2	3	3	6	5	2	13
742	无倦怠		<30岁	住院医师	<2年	61-70h	5-8次	非三甲医院	中型	东北	1-3h	否	是	否	否	否	否	直播	偶尔看看	参与线上讨论	无安排	偶尔	独自观看	否	2	4	2	4	4	5	13
743	有倦怠	中度倦怠	35-39岁	副主任医师	>5年	61-70h	5-8次	三甲医院	大型	东北	<1h	否	否	是	否	是	否	短视频片段	每届都看	全程跟踪重要比赛	无安排	偶尔	与家人	否	4	3	3	14	9	9	32
744	有倦怠	中度倦怠	40-44岁	副主任医师	>5年	71-80h	5-8次	三甲医院	大型	中部	<1h	否	否	是	否	是	否	短视频片段	基本不看	通过集锦了解	无安排	偶尔	球迷组织活动	否	3	3	3	10	8	14	32
745	有倦怠	重度倦怠	40-44岁	副主任医师	>5年	>80h	≥9次	三甲医院	小型	西部	<1h	否	是	是	是	否	否	直播	每届都看	通过集锦了解	无安排	从不	独自观看	否	3	3	3	14	16	15	45
746	有倦怠	轻度倦怠	<30岁	住院医师	<2年	50-60h	≤4次	三甲医院	大型	东北	3-5h	否	是	是	否	否	否	短视频片段	每届都看	通过集锦了解	无安排	经常	独自观看	否	3	3	3	9	5	8	22
747	有倦怠	重度倦怠	30-34岁	主治医师	2-5年	61-70h	5-8次	非三甲医院	中型	东部	<1h	否	否	是	否	否	否	直播	每届都看	只看决赛/关键场次	无安排	偶尔	球迷组织活动	否	3	3	4	16	15	13	44
748	有倦怠	轻度倦怠	≥45岁	主任医师	>5年	50-60h	5-8次	三甲医院	大型	西部	1-3h	是	否	否	是	否	否	短视频片段	每届都看	只看决赛/关键场次	无安排	经常	与家人	否	2	3	3	7	5	3	15
749	无倦怠		<30岁	住院医师	2-5年	50-60h	≤4次	三甲医院	大型	中部	3-5h	是	否	是	否	是	否	图文战报	每届都看	全程跟踪重要比赛	无安排	偶尔	独自观看	否	4	3	4	4	5	4	13
750	有倦怠	轻度倦怠	30-34岁	主治医师	2-5年	61-70h	5-8次	非三甲医院	小型	中部	<1h	是	否	否	是	否	否	短视频片段	主要看中国队比赛	全程跟踪重要比赛	无安排	偶尔	独自观看	否	3	3	3	8	8	8	24
751	无倦怠		35-39岁	副主任医师	2-5年	61-70h	5-8次	非三甲医院	中型	西部	1-3h	否	否	是	是	是	否	短视频片段	每届都看	只看决赛/关键场次	无安排	偶尔	独自观看	否	4	4	3	3	5	5	13
752	有倦怠	中度倦怠	30-34岁	住院医师	<2年	50-60h	5-8次	非三甲医院	中型	东部	>5h	否	否	否	否	是	否	直播	每届都看	只看决赛/关键场次	无安排	偶尔	独自观看	否	2	3	3	7	10	13	30
753	有倦怠	重度倦怠	<30岁	住院医师	<2年	61-70h	5-8次	三甲医院	大型	中部	3-5h	否	否	否	否	否	是	图文战报	每届都看	只看决赛/关键场次	无安排	从不	独自观看	否	3	2	3	14	13	17	44
754	无倦怠		≥45岁	副主任医师	>5年	50-60h	≤4次	三甲医院	小型	西部	1-3h	否	是	否	是	否	否	短视频片段	每届都看	只看决赛/关键场次	无安排	偶尔	与家人	否	4	3	4	3	5	6	14
755	有倦怠	轻度倦怠	30-34岁	主治医师	2-5年	71-80h	≥9次	三甲医院	大型	西部	3-5h	是	是	是	否	否	否	直播	每届都看	只看决赛/关键场次	无安排	偶尔	与同事/朋友	是	3	3	2	7	6	10	23
756	有倦怠	轻度倦怠	40-44岁	副主任医师	>5年	71-80h	≥9次	非三甲医院	小型	东部	<1h	否	否	否	否	否	是	短视频片段	主要看中国队比赛	参与线上讨论	休息区播放	偶尔	与家人	否	2	3	2	7	10	11	28
757	有倦怠	中度倦怠	30-34岁	主治医师	2-5年	50-60h	5-8次	非三甲医院	中型	中部	1-3h	是	否	否	否	否	否	短视频片段	主要看中国队比赛	只看决赛/关键场次	无安排	经常	球迷组织活动	否	3	2	4	14	5	13	32
758	无倦怠		30-34岁	住院医师	2-5年	61-70h	≥9次	非三甲医院	中型	中部	3-5h	是	是	否	否	否	否	直播	主要看中国队比赛	只看决赛/关键场次	无安排	偶尔	与同事/朋友	否	4	3	4	6	3	5	14
759	有倦怠	中度倦怠	30-34岁	主治医师	2-5年	50-60h	≤4次	非三甲医院	中型	西部	1-3h	否	否	否	否	否	是	直播	主要看中国队比赛	只看决赛/关键场次	无安排	经常	独自观看	否	3	3	3	4	11	14	29
760	有倦怠	轻度倦怠	30-34岁	主治医师	2-5年	50-60h	5-8次	三甲医院	大型	东部	<1h	否	否	否	否	否	是	直播	主要看中国队比赛	只看决赛/关键场次	无安排	偶尔	独自观看	否	2	3	3	4	13	7	24
761	有倦怠	轻度倦怠	40-44岁	副主任医师	>5年	>80h	5-8次	三甲医院	大型	东部	<1h	否	否	否	否	否	是	图文战报	每届都看	只看决赛/关键场次	无安排	偶尔	独自观看	是	3	3	3	12	10	5	27
762	有倦怠	轻度倦怠	<30岁	住院医师	<2年	>80h	5-8次	三甲医院	大型	西部	3-5h	否	否	是	否	否	否	短视频片段	基本不看	参与线上讨论	调班排版	偶尔	与同事/朋友	否	3	4	2	9	8	5	22
763	有倦怠	轻度倦怠	35-39岁	副主任医师	>5年	50-60h	5-8次	非三甲医院	中型	中部	3-5h	否	是	是	否	是	否	短视频片段	每届都看	通过集锦了解	休息区播放	偶尔	与同事/朋友	否	3	2	4	5	7	12	24
764	有倦怠	轻度倦怠	40-44岁	主治医师	>5年	50-60h	≤4次	三甲医院	中型	中部	<1h	否	否	是	否	否	否	直播	每届都看	只看决赛/关键场次	无安排	偶尔	独自观看	否	4	4	3	6	8	8	22
765	有倦怠	轻度倦怠	35-39岁	副主任医师	>5年	61-70h	5-8次	三甲医院	小型	东北	<1h	是	是	否	是	否	是	直播	主要看中国队比赛	通过集锦了解	休息区播放	偶尔	与同事/朋友	否	2	2	4	7	6	5	18
766	有倦怠	轻度倦怠	40-44岁	副主任医师	>5年	61-70h	≥9次	三甲医院	大型	中部	1-3h	是	是	否	否	是	否	现场/公共场所	主要看中国队比赛	只看决赛/关键场次	无安排	偶尔	与家人	是	3	4	3	8	9	5	22
767	无倦怠		<30岁	住院医师	<2年	50-60h	≤4次	非三甲医院	小型	西部	3-5h	否	否	否	否	否	是	短视频片段	每届都看	只看决赛/关键场次	无安排	偶尔	独自观看	否	4	3	3	5	3	6	14
768	有倦怠	中度倦怠	<30岁	住院医师	<2年	61-70h	5-8次	非三甲医院	小型	中部	<1h	否	是	否	是	否	否	直播	主要看中国队比赛	只看决赛/关键场次	调班排版	从不	球迷组织活动	否	3	3	4	8	8	13	29
769	有倦怠	重度倦怠	35-39岁	主治医师	>5年	50-60h	5-8次	非三甲医院	中型	东部	<1h	否	否	否	否	否	是	现场/公共场所	每届都看	全程跟踪重要比赛	无安排	偶尔	独自观看	否	3	4	4	12	15	15	42
770	有倦怠	轻度倦怠	35-39岁	主治医师	>5年	50-60h	5-8次	非三甲医院	小型	东部	<1h	是	是	否	否	否	否	图文战报	每届都看	参与线上讨论	无安排	偶尔	独自观看	是	4	3	3	10	8	3	21
771	有倦怠	轻度倦怠	35-39岁	主治医师	>5年	50-60h	≥9次	非三甲医院	中型	东部	<1h	是	是	否	否	是	否	图文战报	每届都看	只看决赛/关键场次	无安排	偶尔	与家人	否	4	3	3	10	9	8	27
772	有倦怠	轻度倦怠	40-44岁	副主任医师	>5年	61-70h	5-8次	非三甲医院	中型	东部	<1h	否	否	是	否	否	是	图文战报	每届都看	全程跟踪重要比赛	无安排	偶尔	独自观看	否	3	3	3	7	9	7	23
773	无倦怠		40-44岁	副主任医师	>5年	50-60h	5-8次	三甲医院	大型	西部	3-5h	是	是	否	否	否	否	直播	每届都看	只看决赛/关键场次	无安排	从不	独自观看	否	3	3	2	4	7	3	14
774	有倦怠	轻度倦怠	<30岁	住院医师	<2年	<50h	≤4次	三甲医院	大型	中部	3-5h	是	是	否	是	是	否	现场/公共场所	偶尔看看	只看决赛/关键场次	无安排	偶尔	与同事/朋友	否	3	3	3	8	7	3	18
775	有倦怠	轻度倦怠	35-39岁	主治医师	>5年	50-60h	5-8次	三甲医院	大型	东北	1-3h	否	否	是	否	否	否	直播	每届都看	只看决赛/关键场次	无安排	偶尔	独自观看	否	3	3	3	7	10	6	23
776	有倦怠	重度倦怠	30-34岁	主治医师	2-5年	50-60h	≤4次	非三甲医院	小型	东部	<1h	否	否	是	否	是	否	图文战报	偶尔看看	通过集锦了解	无安排	偶尔	球迷组织活动	否	3	3	4	16	16	11	43
777	有倦怠	轻度倦怠	40-44岁	副主任医师	>5年	50-60h	5-8次	三甲医院	大型	中部	<1h	是	否	是	否	是	否	短视频片段	主要看中国队比赛	通过集锦了解	无安排	偶尔	球迷组织活动	是	2	3	3	4	11	13	28
778	有倦怠	中度倦怠	30-34岁	主治医师	2-5年	50-60h	5-8次	三甲医院	小型	西部	<1h	是	否	否	否	否	否	直播	每届都看	参与线上讨论	无安排	偶尔	与同事/朋友	否	3	4	2	11	8	10	29
779	有倦怠	轻度倦怠	35-39岁	主治医师	>5年	50-60h	5-8次	非三甲医院	中型	中部	<1h	否	否	否	否	是	是	短视频片段	每届都看	只看决赛/关键场次	无安排	偶尔	与家人	否	2	3	2	8	10	6	24
780	有倦怠	中度倦怠	<30岁	住院医师	<2年	61-70h	5-8次	非三甲医院	中型	东北	<1h	否	是	是	否	是	否	短视频片段	主要看中国队比赛	只看决赛/关键场次	无安排	偶尔	独自观看	是	3	3	3	14	10	6	30
781	有倦怠	中度倦怠	40-44岁	主治医师	>5年	50-60h	≤4次	非三甲医院	中型	西部	1-3h	是	否	否	否	否	否	短视频片段	主要看中国队比赛	只看决赛/关键场次	无安排	偶尔	与家人	否	3	2	3	14	8	10	32
782	有倦怠	轻度倦怠	35-39岁	主治医师	>5年	71-80h	≥9次	三甲医院	大型	西部	3-5h	是	是	是	否	否	否	直播	每届都看	只看决赛/关键场次	休息区播放	偶尔	独自观看	否	3	3	3	4	5	13	22
783	有倦怠	中度倦怠	30-34岁	副主任医师	>5年	71-80h	≥9次	非三甲医院	中型	中部	3-5h	否	否	否	否	否	是	短视频片段	主要看中国队比赛	只看决赛/关键场次	无安排	偶尔	独自观看	是	3	3	3	10	13	7	30
784	有倦怠	中度倦怠	<30岁	住院医师	<2年	<50h	≤4次	非三甲医院	中型	东部	3-5h	否	否	否	否	否	是	图文战报	主要看中国队比赛	只看决赛/关键场次	无安排	从不	独自观看	否	3	3	3	5	12	13	30
785	有倦怠	轻度倦怠	35-39岁	主治医师	>5年	50-60h	≤4次	非三甲医院	小型	东部	<1h	否	是	否	是	否	否	直播	主要看中国队比赛	全程跟踪重要比赛	休息区播放	偶尔	独自观看	否	2	3	3	8	6	12	26
786	无倦怠		35-39岁	主治医师	>5年	50-60h	5-8次	三甲医院	大型	中部	3-5h	否	是	否	否	否	是	直播	基本不看	只看决赛/关键场次	调班排版	偶尔	球迷组织活动	否	3	3	3	5	6	3	14
787	无倦怠		40-44岁	主治医师	>5年	50-60h	≤4次	三甲医院	大型	中部	3-5h	否	否	否	否	是	是	直播	主要看中国队比赛	只看决赛/关键场次	无安排	偶尔	独自观看	否	3	3	3	4	4	4	12
788	有倦怠	中度倦怠	40-44岁	副主任医师	>5年	50-60h	5-8次	非三甲医院	中型	东部	<1h	否	否	否	否	否	是	直播	主要看中国队比赛	通过集锦了解	无安排	从不	与家人	否	3	2	3	14	11	6	31
789	有倦怠	中度倦怠	35-39岁	主治医师	>5年	61-70h	≥9次	非三甲医院	中型	西部	1-3h	否	是	否	是	否	否	短视频片段	主要看中国队比赛	全程跟踪重要比赛	休息区播放	偶尔	与家人	否	4	2	3	8	12	13	33
790	无倦怠		<30岁	住院医师	<2年	>80h	5-8次	三甲医院	大型	东部	3-5h	否	否	否	否	否	是	直播	主要看中国队比赛	只看决赛/关键场次	调班排版	从不	与同事/朋友	否	2	3	3	4	6	2	12
791	有倦怠	中度倦怠	35-39岁	主治医师	>5年	61-70h	5-8次	三甲医院	大型	西部	1-3h	否	是	否	否	否	否	直播	主要看中国队比赛	只看决赛/关键场次	无安排	从不	独自观看	否	2	3	3	15	9	9	33
792	有倦怠	中度倦怠	≥45岁	主任医师	>5年	50-60h	5-8次	非三甲医院	中型	西部	>5h	否	否	是	否	否	否	现场/公共场所	主要看中国队比赛	只看决赛/关键场次	无安排	偶尔	与同事/朋友	是	3	3	3	11	8	13	32
793	无倦怠		40-44岁	副主任医师	>5年	<50h	≥9次	三甲医院	大型	东部	3-5h	否	否	否	否	否	是	直播	主要看中国队比赛	只看决赛/关键场次	无安排	偶尔	球迷组织活动	否	3	2	2	5	3	6	14
794	有倦怠	中度倦怠	<30岁	住院医师	<2年	50-60h	5-8次	非三甲医院	中型	东部	<1h	否	否	否	否	否	是	直播	主要看中国队比赛	只看决赛/关键场次	无安排	偶尔	球迷组织活动	否	2	4	3	12	10	7	29
795	有倦怠	轻度倦怠	30-34岁	主治医师	2-5年	>80h	≥9次	三甲医院	小型	东部	1-3h	是	否	是	否	否	否	短视频片段	偶尔看看	只看决赛/关键场次	休息区播放	经常	与家人	否	3	3	2	6	6	10	22
796	有倦怠	轻度倦怠	<30岁	住院医师	<2年	>80h	5-8次	非三甲医院	中型	西部	3-5h	是	是	否	否	否	否	短视频片段	主要看中国队比赛	参与线上讨论	无安排	经常	独自观看	否	3	3	3	10	6	8	24
797	有倦怠	中度倦怠	<30岁	住院医师	2-5年	61-70h	≥9次	三甲医院	大型	东北	<1h	是	否	否	否	否	否	直播	每届都看	全程跟踪重要比赛	无安排	偶尔	与同事/朋友	是	3	4	3	12	11	9	32
798	有倦怠	中度倦怠	<30岁	住院医师	<2年	61-70h	5-8次	非三甲医院	中型	西部	<1h	是	否	是	否	是	否	短视频片段	每届都看	参与线上讨论	无安排	偶尔	与同事/朋友	否	3	4	4	9	7	15	31
799	有倦怠	轻度倦怠	40-44岁	副主任医师	>5年	50-60h	5-8次	非三甲医院	中型	东北	<1h	是	是	是	否	是	是	图文战报	主要看中国队比赛	全程跟踪重要比赛	调班排版	偶尔	与同事/朋友	否	3	3	3	7	4	6	17
800	无倦怠		35-39岁	副主任医师	2-5年	61-70h	5-8次	三甲医院	大型	中部	<1h	是	是	是	否	否	否	直播	每届都看	全程跟踪重要比赛	无安排	偶尔	与同事/朋友	否	3	2	4	3	3	6	12
801	有倦怠	中度倦怠	40-44岁	主任医师	>5年	50-60h	5-8次	非三甲医院	小型	中部	1-3h	否	是	否	否	否	是	直播	每届都看	全程跟踪重要比赛	无安排	从不	独自观看	否	3	3	3	10	10	14	34
802	有倦怠	中度倦怠	≥45岁	主任医师	>5年	50-60h	≤4次	非三甲医院	小型	东北	>5h	否	否	否	否	否	是	直播	主要看中国队比赛	只看决赛/关键场次	无安排	偶尔	独自观看	否	3	3	3	17	10	5	32
803	有倦怠	重度倦怠	30-34岁	主治医师	2-5年	61-70h	5-8次	三甲医院	大型	西部	3-5h	否	否	否	否	是	否	直播	每届都看	通过集锦了解	无安排	偶尔	与同事/朋友	否	2	2	3	18	17	13	48
804	无倦怠		30-34岁	住院医师	2-5年	>80h	≥9次	三甲医院	大型	东部	<1h	是	否	否	否	否	否	短视频片段	主要看中国队比赛	只看决赛/关键场次	无安排	偶尔	与同事/朋友	否	3	2	3	5	3	6	14
805	有倦怠	轻度倦怠	35-39岁	副主任医师	>5年	61-70h	5-8次	非三甲医院	大型	中部	<1h	是	否	否	否	否	否	短视频片段	每届都看	只看决赛/关键场次	无安排	偶尔	与家人	否	3	3	3	8	13	3	24
806	有倦怠	轻度倦怠	35-39岁	主治医师	>5年	50-60h	≤4次	非三甲医院	小型	东部	1-3h	是	否	否	否	是	否	直播	偶尔看看	只看决赛/关键场次	无安排	偶尔	与同事/朋友	是	3	4	3	12	10	5	27
807	有倦怠	中度倦怠	35-39岁	主治医师	>5年	50-60h	5-8次	非三甲医院	小型	西部	1-3h	否	否	是	否	是	否	短视频片段	每届都看	只看决赛/关键场次	无安排	偶尔	与同事/朋友	否	4	3	2	12	10	7	29
808	有倦怠	轻度倦怠	30-34岁	住院医师	2-5年	50-60h	≤4次	三甲医院	大型	中部	<1h	否	否	否	否	否	是	直播	每届都看	全程跟踪重要比赛	无安排	偶尔	与家人	否	3	2	3	7	6	3	16
809	无倦怠		35-39岁	主治医师	>5年	50-60h	≤4次	三甲医院	大型	中部	3-5h	是	是	否	否	是	否	直播	主要看中国队比赛	只看决赛/关键场次	无安排	偶尔	球迷组织活动	是	3	3	2	6	4	4	14
810	有倦怠	轻度倦怠	40-44岁	副主任医师	>5年	50-60h	5-8次	三甲医院	大型	中部	<1h	是	是	否	否	否	否	图文战报	每届都看	只看决赛/关键场次	无安排	偶尔	与同事/朋友	是	3	3	3	9	4	5	18
811	有倦怠	中度倦怠	40-44岁	主治医师	>5年	61-70h	5-8次	三甲医院	大型	东部	<1h	否	否	否	是	否	否	短视频片段	每届都看	参与线上讨论	无安排	偶尔	球迷组织活动	否	3	3	3	13	7	12	32
812	无倦怠		40-44岁	副主任医师	>5年	71-80h	5-8次	三甲医院	小型	中部	3-5h	否	否	否	否	否	是	短视频片段	每届都看	只看决赛/关键场次	无安排	偶尔	与同事/朋友	否	3	3	3	6	3	3	12
813	有倦怠	中度倦怠	40-44岁	副主任医师	>5年	50-60h	5-8次	三甲医院	大型	东部	1-3h	是	是	是	否	是	否	短视频片段	每届都看	通过集锦了解	调班排版	偶尔	独自观看	否	3	3	3	12	8	12	32
814	无倦怠		35-39岁	副主任医师	2-5年	50-60h	5-8次	非三甲医院	中型	东北	3-5h	是	否	是	否	是	否	直播	每届都看	只看决赛/关键场次	无安排	偶尔	与家人	否	2	3	3	4	5	3	12
815	有倦怠	轻度倦怠	35-39岁	副主任医师	>5年	50-60h	5-8次	三甲医院	大型	西部	3-5h	否	否	否	否	否	是	直播	每届都看	参与线上讨论	无安排	偶尔	独自观看	否	4	3	3	5	11	8	24
816	有倦怠	轻度倦怠	<30岁	住院医师	<2年	50-60h	5-8次	三甲医院	大型	西部	>5h	否	是	否	否	否	否	直播	主要看中国队比赛	只看决赛/关键场次	无安排	经常	与家人	否	2	2	3	5	10	5	20
817	有倦怠	轻度倦怠	35-39岁	主治医师	>5年	50-60h	5-8次	三甲医院	大型	中部	<1h	否	是	否	否	否	是	短视频片段	每届都看	只看决赛/关键场次	无安排	偶尔	与家人	否	3	2	4	8	12	7	27
818	有倦怠	重度倦怠	<30岁	住院医师	<2年	71-80h	≥9次	非三甲医院	中型	东部	1-3h	否	否	否	否	否	是	直播	每届都看	通过集锦了解	无安排	经常	独自观看	否	4	3	2	16	12	18	46
819	有倦怠	中度倦怠	30-34岁	主治医师	2-5年	50-60h	5-8次	三甲医院	大型	西部	>5h	否	否	否	否	否	是	短视频片段	主要看中国队比赛	全程跟踪重要比赛	无安排	偶尔	与同事/朋友	是	4	4	2	11	8	12	31
820	无倦怠		40-44岁	主治医师	>5年	50-60h	≤4次	三甲医院	大型	东部	1-3h	否	否	是	否	否	否	直播	基本不看	通过集锦了解	无安排	偶尔	独自观看	否	3	4	3	3	3	6	12
821	有倦怠	轻度倦怠	40-44岁	副主任医师	>5年	71-80h	≥9次	三甲医院	小型	中部	<1h	是	否	否	是	否	是	直播	偶尔看看	只看决赛/关键场次	无安排	偶尔	独自观看	否	2	2	3	9	10	5	24
822	有倦怠	轻度倦怠	40-44岁	副主任医师	>5年	<50h	≤4次	非三甲医院	中型	中部	<1h	否	是	否	否	是	否	直播	主要看中国队比赛	参与线上讨论	无安排	经常	独自观看	是	2	3	2	9	10	8	27
823	有倦怠	中度倦怠	40-44岁	副主任医师	>5年	50-60h	≤4次	三甲医院	大型	中部	3-5h	否	否	是	否	是	否	现场/公共场所	偶尔看看	通过集锦了解	无安排	偶尔	独自观看	否	2	4	3	10	15	10	35
824	无倦怠		40-44岁	副主任医师	>5年	50-60h	≤4次	三甲医院	中型	东北	3-5h	否	是	否	否	是	否	图文战报	主要看中国队比赛	全程跟踪重要比赛	无安排	从不	与同事/朋友	是	3	2	4	6	5	2	13
825	有倦怠	轻度倦怠	≥45岁	主任医师	>5年	61-70h	5-8次	三甲医院	大型	东部	<1h	是	是	否	否	否	否	短视频片段	每届都看	全程跟踪重要比赛	无安排	偶尔	独自观看	否	3	2	2	6	8	8	22
826	无倦怠		<30岁	住院医师	>5年	61-70h	≥9次	三甲医院	大型	西部	3-5h	否	是	否	否	否	否	图文战报	每届都看	只看决赛/关键场次	无安排	偶尔	独自观看	否	2	3	2	5	3	5	13
827	无倦怠		<30岁	住院医师	2-5年	>80h	≥9次	三甲医院	大型	东部	3-5h	否	是	否	否	否	否	直播	每届都看	通过集锦了解	无安排	偶尔	与家人	否	4	3	3	6	6	2	14
828	有倦怠	轻度倦怠	40-44岁	副主任医师	>5年	50-60h	5-8次	非三甲医院	大型	东北	3-5h	是	是	否	是	是	否	现场/公共场所	偶尔看看	只看决赛/关键场次	无安排	偶尔	与同事/朋友	否	4	3	3	5	10	5	20
829	无倦怠		35-39岁	主治医师	>5年	71-80h	5-8次	非三甲医院	中型	东部	1-3h	是	是	否	否	否	否	直播	主要看中国队比赛	只看决赛/关键场次	无安排	偶尔	与家人	否	2	3	3	7	3	3	13
830	有倦怠	轻度倦怠	35-39岁	副主任医师	>5年	71-80h	≥9次	三甲医院	大型	中部	<1h	否	是	否	否	是	否	直播	主要看中国队比赛	通过集锦了解	无安排	经常	独自观看	否	3	4	3	8	6	10	24
831	有倦怠	轻度倦怠	35-39岁	主治医师	>5年	50-60h	≤4次	三甲医院	大型	西部	3-5h	否	否	否	否	否	是	直播	主要看中国队比赛	只看决赛/关键场次	无安排	偶尔	球迷组织活动	是	3	3	2	11	10	6	27
832	有倦怠	重度倦怠	40-44岁	副主任医师	>5年	>80h	≥9次	三甲医院	大型	东部	1-3h	否	否	是	否	是	否	直播	每届都看	参与线上讨论	无安排	经常	与同事/朋友	否	3	4	2	14	16	16	46
833	有倦怠	轻度倦怠	<30岁	住院医师	<2年	50-60h	5-8次	非三甲医院	中型	西部	1-3h	是	否	是	是	否	是	直播	主要看中国队比赛	只看决赛/关键场次	无安排	从不	与同事/朋友	否	3	2	4	12	7	6	25
834	有倦怠	轻度倦怠	30-34岁	住院医师	2-5年	71-80h	5-8次	三甲医院	小型	东部	<1h	否	否	否	是	否	否	短视频片段	每届都看	全程跟踪重要比赛	休息区播放	偶尔	独自观看	否	3	3	3	4	11	5	20
835	有倦怠	轻度倦怠	<30岁	住院医师	<2年	61-70h	5-8次	三甲医院	中型	东部	<1h	是	是	否	否	否	否	直播	主要看中国队比赛	全程跟踪重要比赛	无安排	偶尔	独自观看	是	3	4	3	9	6	7	22
836	无倦怠		40-44岁	主治医师	>5年	71-80h	5-8次	非三甲医院	中型	西部	>5h	是	否	否	否	否	否	直播	基本不看	参与线上讨论	无安排	偶尔	与家人	是	3	4	3	4	3	6	13
837	有倦怠	轻度倦怠	30-34岁	主治医师	2-5年	50-60h	5-8次	非三甲医院	小型	中部	>5h	是	是	否	否	否	否	短视频片段	每届都看	只看决赛/关键场次	无安排	偶尔	独自观看	否	3	3	3	8	7	11	26
838	有倦怠	中度倦怠	<30岁	住院医师	<2年	>80h	≥9次	非三甲医院	中型	西部	3-5h	是	否	否	否	否	是	短视频片段	基本不看	只看决赛/关键场次	无安排	偶尔	独自观看	否	3	3	3	12	8	10	30
839	有倦怠	中度倦怠	40-44岁	副主任医师	>5年	61-70h	5-8次	非三甲医院	小型	中部	<1h	否	是	是	否	是	否	直播	基本不看	全程跟踪重要比赛	休息区播放	从不	球迷组织活动	否	3	3	3	10	10	12	32
840	有倦怠	中度倦怠	35-39岁	主治医师	2-5年	50-60h	5-8次	非三甲医院	中型	中部	3-5h	是	否	是	是	否	否	短视频片段	每届都看	只看决赛/关键场次	无安排	偶尔	独自观看	是	3	3	3	11	12	7	30
841	有倦怠	轻度倦怠	30-34岁	主治医师	2-5年	71-80h	≥9次	非三甲医院	大型	中部	3-5h	是	是	否	否	是	否	图文战报	每届都看	只看决赛/关键场次	无安排	偶尔	独自观看	否	3	3	3	6	6	10	22
842	有倦怠	中度倦怠	30-34岁	主治医师	2-5年	>80h	5-8次	三甲医院	大型	中部	1-3h	是	是	否	否	是	否	图文战报	偶尔看看	通过集锦了解	无安排	从不	独自观看	否	3	3	3	16	8	7	31
843	有倦怠	重度倦怠	≥45岁	主治医师	>5年	>80h	5-8次	三甲医院	大型	中部	1-3h	否	否	否	否	否	是	直播	主要看中国队比赛	参与线上讨论	无安排	经常	独自观看	是	3	3	3	15	18	13	46
844	有倦怠	重度倦怠	40-44岁	副主任医师	>5年	>80h	5-8次	非三甲医院	大型	东部	<1h	否	否	否	否	是	否	直播	主要看中国队比赛	只看决赛/关键场次	无安排	偶尔	与同事/朋友	是	3	4	3	13	13	16	42
845	有倦怠	中度倦怠	35-39岁	主治医师	>5年	50-60h	≤4次	非三甲医院	小型	中部	<1h	否	否	否	否	否	是	短视频片段	每届都看	全程跟踪重要比赛	无安排	偶尔	独自观看	否	4	4	3	11	14	12	37
846	有倦怠	轻度倦怠	40-44岁	副主任医师	>5年	50-60h	≤4次	非三甲医院	小型	东北	1-3h	否	否	否	否	否	是	直播	主要看中国队比赛	全程跟踪重要比赛	调班排版	经常	与同事/朋友	否	3	3	3	9	9	10	28
847	无倦怠		<30岁	住院医师	<2年	61-70h	5-8次	三甲医院	大型	东北	3-5h	是	是	是	否	否	否	直播	每届都看	只看决赛/关键场次	休息区播放	从不	球迷组织活动	否	3	3	3	5	4	1	10
848	无倦怠		40-44岁	副主任医师	>5年	71-80h	5-8次	非三甲医院	中型	西部	3-5h	是	是	是	否	是	否	直播	每届都看	通过集锦了解	无安排	偶尔	独自观看	否	3	3	3	3	3	6	12
849	有倦怠	轻度倦怠	<30岁	住院医师	<2年	50-60h	5-8次	三甲医院	大型	西部	>5h	否	否	否	是	否	否	图文战报	每届都看	只看决赛/关键场次	无安排	偶尔	与家人	是	4	2	4	8	6	11	25
850	有倦怠	中度倦怠	35-39岁	主治医师	>5年	50-60h	≤4次	非三甲医院	中型	西部	1-3h	是	否	否	是	否	否	直播	每届都看	只看决赛/关键场次	无安排	偶尔	与同事/朋友	否	4	4	3	13	13	6	32
851	有倦怠	轻度倦怠	40-44岁	副主任医师	>5年	<50h	≤4次	非三甲医院	中型	中部	<1h	是	是	否	否	否	否	短视频片段	主要看中国队比赛	全程跟踪重要比赛	无安排	经常	独自观看	是	3	3	3	5	8	5	18
852	有倦怠	重度倦怠	35-39岁	主治医师	>5年	50-60h	5-8次	非三甲医院	大型	中部	<1h	否	否	否	否	否	是	直播	每届都看	全程跟踪重要比赛	无安排	从不	与家人	否	3	3	3	13	14	15	42
853	无倦怠		<30岁	住院医师	2-5年	50-60h	≥9次	非三甲医院	小型	中部	3-5h	否	是	否	是	否	否	现场/公共场所	每届都看	只看决赛/关键场次	休息区播放	偶尔	独自观看	否	2	3	3	4	4	5	13
854	有倦怠	轻度倦怠	30-34岁	主治医师	2-5年	71-80h	≥9次	三甲医院	大型	中部	<1h	是	否	否	否	是	否	直播	偶尔看看	通过集锦了解	无安排	偶尔	球迷组织活动	否	2	3	3	11	9	8	28
855	有倦怠	轻度倦怠	40-44岁	副主任医师	>5年	50-60h	≤4次	非三甲医院	大型	西部	3-5h	否	否	否	是	否	否	直播	每届都看	参与线上讨论	休息区播放	偶尔	独自观看	否	3	3	4	5	6	5	16
856	无倦怠		<30岁	住院医师	<2年	>80h	≥9次	三甲医院	大型	中部	3-5h	是	否	否	否	否	否	直播	每届都看	全程跟踪重要比赛	无安排	偶尔	与家人	否	4	2	3	5	3	6	14
857	无倦怠		35-39岁	主治医师	>5年	50-60h	≥9次	三甲医院	大型	西部	3-5h	否	是	是	否	否	否	短视频片段	主要看中国队比赛	通过集锦了解	无安排	从不	独自观看	否	3	3	3	5	3	6	14
858	无倦怠		40-44岁	副主任医师	>5年	<50h	≥9次	三甲医院	大型	东部	3-5h	否	否	否	否	否	是	直播	主要看中国队比赛	只看决赛/关键场次	无安排	偶尔	独自观看	否	3	3	3	5	3	6	14
859	有倦怠	中度倦怠	30-34岁	副主任医师	>5年	50-60h	5-8次	三甲医院	大型	东部	>5h	是	否	是	否	否	否	直播	每届都看	只看决赛/关键场次	无安排	偶尔	球迷组织活动	否	3	3	3	14	14	13	41
860	有倦怠	重度倦怠	40-44岁	副主任医师	>5年	50-60h	5-8次	三甲医院	大型	东部	3-5h	否	是	否	否	否	否	短视频片段	每届都看	只看决赛/关键场次	休息区播放	偶尔	独自观看	否	4	3	3	16	16	11	43
861	有倦怠	轻度倦怠	40-44岁	副主任医师	>5年	61-70h	5-8次	非三甲医院	中型	中部	<1h	是	是	是	是	否	否	短视频片段	每届都看	全程跟踪重要比赛	无安排	从不	与家人	否	3	3	2	5	11	10	26
862	有倦怠	轻度倦怠	30-34岁	主治医师	2-5年	<50h	≤4次	三甲医院	大型	东部	<1h	否	否	否	否	是	否	现场/公共场所	主要看中国队比赛	只看决赛/关键场次	调班排版	偶尔	与同事/朋友	否	3	3	3	8	9	11	28
863	有倦怠	轻度倦怠	≥45岁	主任医师	>5年	50-60h	5-8次	三甲医院	小型	东北	1-3h	是	是	否	否	是	否	现场/公共场所	每届都看	只看决赛/关键场次	无安排	从不	独自观看	否	3	3	3	5	8	5	18
864	有倦怠	中度倦怠	≥45岁	主任医师	>5年	50-60h	5-8次	三甲医院	大型	西部	<1h	否	否	否	否	是	否	短视频片段	每届都看	全程跟踪重要比赛	无安排	偶尔	独自观看	否	2	4	3	5	14	12	31
865	无倦怠		35-39岁	副主任医师	>5年	50-60h	≤4次	三甲医院	大型	中部	3-5h	否	否	否	否	是	是	短视频片段	每届都看	只看决赛/关键场次	无安排	偶尔	独自观看	否	3	4	3	5	6	2	13
866	无倦怠		40-44岁	主任医师	>5年	50-60h	5-8次	三甲医院	大型	中部	1-3h	是	否	是	否	是	否	短视频片段	每届都看	全程跟踪重要比赛	无安排	偶尔	与同事/朋友	否	4	3	4	4	3	5	12
867	有倦怠	中度倦怠	<30岁	住院医师	2-5年	>80h	5-8次	非三甲医院	小型	中部	<1h	是	否	否	否	否	否	直播	主要看中国队比赛	全程跟踪重要比赛	无安排	偶尔	独自观看	是	3	3	2	12	13	7	32
868	有倦怠	轻度倦怠	30-34岁	主治医师	2-5年	>80h	≥9次	三甲医院	大型	西部	>5h	是	是	否	否	否	否	短视频片段	主要看中国队比赛	只看决赛/关键场次	无安排	从不	与家人	是	3	3	3	9	8	7	24
869	无倦怠		<30岁	住院医师	2-5年	50-60h	≤4次	三甲医院	大型	东北	<1h	是	否	否	否	是	否	现场/公共场所	每届都看	只看决赛/关键场次	无安排	偶尔	与同事/朋友	否	3	4	2	4	8	1	13
870	无倦怠		40-44岁	副主任医师	>5年	50-60h	5-8次	三甲医院	大型	西部	<1h	是	否	否	否	是	否	直播	主要看中国队比赛	参与线上讨论	无安排	从不	与同事/朋友	否	3	4	3	4	4	5	13
871	有倦怠	重度倦怠	35-39岁	主治医师	>5年	50-60h	≤4次	三甲医院	大型	东部	<1h	否	否	否	是	是	否	直播	主要看中国队比赛	只看决赛/关键场次	无安排	偶尔	独自观看	否	2	3	3	15	14	13	42
872	有倦怠	轻度倦怠	35-39岁	主治医师	2-5年	50-60h	5-8次	非三甲医院	中型	西部	1-3h	否	是	否	是	否	否	短视频片段	每届都看	全程跟踪重要比赛	无安排	从不	与家人	否	3	3	3	10	5	6	21
873	有倦怠	轻度倦怠	<30岁	住院医师	<2年	50-60h	5-8次	三甲医院	大型	西部	3-5h	否	否	否	否	是	否	直播	主要看中国队比赛	全程跟踪重要比赛	无安排	偶尔	球迷组织活动	否	2	2	2	9	7	8	24
874	无倦怠		35-39岁	主治医师	>5年	50-60h	5-8次	三甲医院	小型	东北	<1h	是	否	是	否	否	否	短视频片段	主要看中国队比赛	参与线上讨论	无安排	偶尔	与同事/朋友	是	3	3	3	4	8	2	14
875	有倦怠	轻度倦怠	35-39岁	主治医师	>5年	71-80h	5-8次	三甲医院	大型	西部	3-5h	否	否	否	否	否	是	短视频片段	主要看中国队比赛	参与线上讨论	无安排	偶尔	独自观看	是	3	3	3	9	7	5	21
876	有倦怠	轻度倦怠	40-44岁	副主任医师	>5年	61-70h	5-8次	三甲医院	中型	东部	3-5h	是	是	否	否	是	否	直播	每届都看	只看决赛/关键场次	休息区播放	偶尔	独自观看	否	3	4	3	9	10	3	22
877	有倦怠	中度倦怠	30-34岁	主治医师	>5年	>80h	5-8次	三甲医院	大型	东北	<1h	否	否	否	否	否	是	直播	主要看中国队比赛	全程跟踪重要比赛	无安排	偶尔	与同事/朋友	是	3	4	4	17	10	5	32
878	有倦怠	中度倦怠	30-34岁	主治医师	2-5年	61-70h	5-8次	三甲医院	小型	西部	1-3h	否	否	是	否	否	否	直播	每届都看	全程跟踪重要比赛	调班排版	偶尔	独自观看	否	3	3	3	9	9	11	29
879	有倦怠	中度倦怠	35-39岁	主治医师	>5年	61-70h	≥9次	非三甲医院	小型	中部	<1h	是	否	是	否	是	否	短视频片段	主要看中国队比赛	全程跟踪重要比赛	无安排	偶尔	与同事/朋友	否	3	4	3	10	10	12	32
880	无倦怠		40-44岁	主任医师	>5年	50-60h	5-8次	非三甲医院	中型	西部	3-5h	是	是	否	否	否	否	图文战报	主要看中国队比赛	只看决赛/关键场次	无安排	偶尔	球迷组织活动	否	3	3	3	7	3	4	14
881	有倦怠	中度倦怠	≥45岁	主治医师	>5年	>80h	5-8次	三甲医院	大型	西部	1-3h	否	否	否	否	否	是	图文战报	每届都看	只看决赛/关键场次	无安排	经常	独自观看	否	3	3	3	10	10	11	31
882	有倦怠	轻度倦怠	<30岁	住院医师	<2年	50-60h	5-8次	三甲医院	大型	东部	1-3h	是	否	否	否	否	是	短视频片段	每届都看	参与线上讨论	无安排	从不	独自观看	否	3	3	4	11	8	8	27
883	有倦怠	中度倦怠	40-44岁	主治医师	>5年	>80h	5-8次	非三甲医院	大型	西部	3-5h	否	否	否	否	是	否	图文战报	主要看中国队比赛	只看决赛/关键场次	无安排	偶尔	球迷组织活动	否	2	3	4	10	11	10	31
884	有倦怠	重度倦怠	30-34岁	主治医师	2-5年	71-80h	5-8次	非三甲医院	小型	东部	>5h	是	是	否	否	否	否	短视频片段	每届都看	只看决赛/关键场次	无安排	偶尔	独自观看	否	3	2	4	11	16	17	44
885	有倦怠	轻度倦怠	<30岁	住院医师	2-5年	50-60h	5-8次	三甲医院	大型	西部	3-5h	是	是	否	否	是	否	直播	每届都看	只看决赛/关键场次	无安排	偶尔	独自观看	否	2	3	3	9	9	5	23
886	有倦怠	轻度倦怠	40-44岁	副主任医师	>5年	50-60h	≤4次	三甲医院	大型	东北	3-5h	否	否	否	否	否	是	直播	每届都看	只看决赛/关键场次	无安排	偶尔	独自观看	否	4	2	3	13	9	5	27
887	有倦怠	轻度倦怠	≥45岁	主任医师	>5年	50-60h	≤4次	非三甲医院	小型	西部	3-5h	是	是	否	是	否	否	短视频片段	主要看中国队比赛	只看决赛/关键场次	无安排	经常	球迷组织活动	否	3	3	2	8	9	7	24
888	有倦怠	重度倦怠	40-44岁	副主任医师	>5年	>80h	≥9次	非三甲医院	中型	中部	<1h	否	否	否	否	否	是	短视频片段	每届都看	参与线上讨论	无安排	经常	独自观看	否	3	3	2	19	11	12	42
889	无倦怠		35-39岁	主治医师	2-5年	61-70h	5-8次	三甲医院	大型	中部	>5h	是	否	否	否	否	否	图文战报	主要看中国队比赛	全程跟踪重要比赛	无安排	偶尔	独自观看	是	3	3	3	4	4	6	14
890	有倦怠	中度倦怠	30-34岁	副主任医师	>5年	61-70h	5-8次	非三甲医院	小型	东部	<1h	否	是	否	否	否	否	直播	每届都看	只看决赛/关键场次	无安排	偶尔	与同事/朋友	否	2	3	4	7	11	12	30
891	有倦怠	轻度倦怠	30-34岁	主治医师	2-5年	50-60h	≤4次	三甲医院	大型	东部	<1h	否	是	否	否	否	是	短视频片段	每届都看	只看决赛/关键场次	无安排	偶尔	与同事/朋友	是	3	4	3	6	9	7	22
892	有倦怠	重度倦怠	40-44岁	副主任医师	>5年	>80h	5-8次	非三甲医院	小型	东北	<1h	否	否	否	否	否	是	短视频片段	每届都看	只看决赛/关键场次	无安排	偶尔	独自观看	否	3	3	3	14	15	15	44
893	有倦怠	轻度倦怠	<30岁	住院医师	<2年	61-70h	5-8次	三甲医院	大型	中部	1-3h	是	是	否	否	否	否	短视频片段	每届都看	只看决赛/关键场次	无安排	从不	独自观看	否	2	3	2	6	9	10	25
894	无倦怠		30-34岁	住院医师	2-5年	50-60h	≥9次	非三甲医院	中型	中部	3-5h	否	否	否	否	否	是	直播	主要看中国队比赛	只看决赛/关键场次	调班排版	偶尔	与同事/朋友	否	3	3	3	4	3	6	13
895	有倦怠	中度倦怠	35-39岁	主治医师	>5年	71-80h	≥9次	三甲医院	小型	东部	<1h	是	否	否	否	否	否	短视频片段	偶尔看看	只看决赛/关键场次	无安排	经常	与同事/朋友	否	3	3	2	13	8	11	32
896	无倦怠		35-39岁	主治医师	>5年	50-60h	5-8次	三甲医院	大型	中部	3-5h	否	否	是	否	是	否	直播	主要看中国队比赛	全程跟踪重要比赛	无安排	偶尔	独自观看	否	2	2	3	4	3	7	14
897	有倦怠	重度倦怠	35-39岁	副主任医师	>5年	71-80h	5-8次	非三甲医院	小型	西部	3-5h	否	否	否	否	否	是	直播	每届都看	全程跟踪重要比赛	无安排	偶尔	独自观看	否	3	3	3	13	18	17	48
898	有倦怠	轻度倦怠	30-34岁	住院医师	<2年	<50h	≤4次	非三甲医院	中型	西部	3-5h	是	是	否	是	否	否	短视频片段	主要看中国队比赛	只看决赛/关键场次	无安排	偶尔	与同事/朋友	否	3	3	4	7	6	7	20
899	有倦怠	轻度倦怠	40-44岁	副主任医师	>5年	50-60h	5-8次	三甲医院	大型	西部	3-5h	是	是	否	否	否	否	现场/公共场所	主要看中国队比赛	全程跟踪重要比赛	无安排	偶尔	独自观看	否	4	3	3	8	14	5	27
900	有倦怠	中度倦怠	40-44岁	副主任医师	>5年	50-60h	5-8次	非三甲医院	大型	东部	<1h	是	否	是	否	否	否	短视频片段	基本不看	全程跟踪重要比赛	无安排	偶尔	独自观看	否	2	3	3	7	13	12	32
901	无倦怠		30-34岁	主任医师	<2年	50-60h	5-8次	三甲医院	大型	西部	3-5h	是	是	否	是	否	是	直播	每届都看	参与线上讨论	无安排	经常	与家人	是	3	3	3	4	5	3	12
902	有倦怠	中度倦怠	<30岁	住院医师	2-5年	61-70h	5-8次	三甲医院	小型	东部	3-5h	否	是	是	是	否	是	短视频片段	主要看中国队比赛	全程跟踪重要比赛	无安排	经常	独自观看	否	3	4	4	15	8	8	31
903	有倦怠	重度倦怠	40-44岁	副主任医师	>5年	>80h	5-8次	三甲医院	大型	东部	>5h	否	是	否	否	否	否	短视频片段	主要看中国队比赛	只看决赛/关键场次	无安排	从不	独自观看	是	3	3	3	17	12	13	42
904	有倦怠	轻度倦怠	35-39岁	主治医师	>5年	50-60h	5-8次	三甲医院	小型	东北	3-5h	否	否	否	否	是	否	直播	每届都看	只看决赛/关键场次	无安排	偶尔	独自观看	否	3	3	4	7	6	5	18
905	有倦怠	轻度倦怠	<30岁	住院医师	<2年	61-70h	5-8次	非三甲医院	大型	东部	3-5h	否	否	否	否	是	否	直播	主要看中国队比赛	只看决赛/关键场次	无安排	偶尔	独自观看	是	3	4	3	6	9	5	20
906	有倦怠	重度倦怠	30-34岁	主治医师	2-5年	71-80h	5-8次	三甲医院	小型	东部	<1h	否	否	否	否	否	是	短视频片段	每届都看	全程跟踪重要比赛	调班排版	经常	与家人	否	3	2	3	16	18	12	46
907	有倦怠	重度倦怠	40-44岁	副主任医师	>5年	>80h	5-8次	非三甲医院	中型	东部	>5h	否	否	否	否	否	是	现场/公共场所	基本不看	全程跟踪重要比赛	无安排	偶尔	独自观看	否	4	4	3	16	17	13	46
908	有倦怠	中度倦怠	35-39岁	主治医师	>5年	<50h	≤4次	非三甲医院	小型	西部	<1h	否	否	否	否	是	否	短视频片段	每届都看	参与线上讨论	无安排	经常	独自观看	否	3	2	3	12	11	9	32
909	有倦怠	重度倦怠	35-39岁	主治医师	>5年	71-80h	5-8次	三甲医院	小型	东部	<1h	否	否	否	否	是	否	短视频片段	每届都看	全程跟踪重要比赛	无安排	偶尔	独自观看	否	4	3	3	16	12	18	46
910	有倦怠	轻度倦怠	30-34岁	主治医师	2-5年	50-60h	≤4次	三甲医院	大型	东部	<1h	否	否	否	否	是	否	短视频片段	主要看中国队比赛	只看决赛/关键场次	无安排	经常	与同事/朋友	否	3	3	3	6	6	10	22
911	有倦怠	中度倦怠	40-44岁	副主任医师	>5年	50-60h	5-8次	三甲医院	大型	东部	<1h	否	是	是	否	否	否	短视频片段	主要看中国队比赛	参与线上讨论	休息区播放	偶尔	与家人	否	3	3	3	10	8	12	30
912	无倦怠		40-44岁	主治医师	>5年	50-60h	≥9次	非三甲医院	小型	东部	3-5h	否	否	否	否	是	是	图文战报	主要看中国队比赛	只看决赛/关键场次	无安排	从不	独自观看	否	3	3	3	4	4	2	10
913	有倦怠	轻度倦怠	≥45岁	主任医师	>5年	50-60h	5-8次	非三甲医院	小型	东部	1-3h	是	否	是	否	是	否	图文战报	每届都看	只看决赛/关键场次	无安排	从不	球迷组织活动	是	3	3	3	10	5	6	21
914	有倦怠	轻度倦怠	35-39岁	主治医师	>5年	61-70h	5-8次	三甲医院	大型	东北	<1h	是	否	是	否	否	否	直播	每届都看	只看决赛/关键场次	调班排版	偶尔	独自观看	否	4	3	3	9	6	6	21
915	有倦怠	轻度倦怠	30-34岁	主治医师	2-5年	71-80h	5-8次	三甲医院	大型	中部	<1h	是	是	否	否	否	否	短视频片段	主要看中国队比赛	只看决赛/关键场次	无安排	从不	与家人	否	3	4	3	7	8	11	26
916	无倦怠		30-34岁	住院医师	2-5年	50-60h	5-8次	三甲医院	小型	中部	3-5h	否	否	否	否	是	否	短视频片段	主要看中国队比赛	只看决赛/关键场次	无安排	偶尔	与家人	否	4	3	3	5	3	6	14
917	无倦怠		30-34岁	副主任医师	2-5年	50-60h	≥9次	三甲医院	大型	东北	>5h	是	是	否	否	是	是	短视频片段	主要看中国队比赛	通过集锦了解	无安排	偶尔	独自观看	否	3	2	2	5	7	2	14
918	有倦怠	轻度倦怠	35-39岁	主治医师	>5年	50-60h	5-8次	非三甲医院	大型	中部	1-3h	是	否	否	是	否	否	直播	每届都看	只看决赛/关键场次	无安排	偶尔	与同事/朋友	否	3	3	3	10	10	8	28
919	无倦怠		40-44岁	副主任医师	>5年	50-60h	5-8次	三甲医院	大型	西部	1-3h	是	是	否	否	否	否	图文战报	每届都看	全程跟踪重要比赛	无安排	偶尔	独自观看	否	1	3	3	3	3	2	8
920	有倦怠	轻度倦怠	35-39岁	主治医师	>5年	50-60h	≤4次	三甲医院	大型	中部	<1h	是	是	否	否	否	是	现场/公共场所	每届都看	通过集锦了解	无安排	偶尔	独自观看	是	3	3	3	11	3	7	21
921	有倦怠	轻度倦怠	30-34岁	主治医师	2-5年	50-60h	≥9次	三甲医院	大型	东部	1-3h	是	是	否	是	否	否	直播	基本不看	只看决赛/关键场次	无安排	偶尔	独自观看	否	2	3	3	11	5	11	27
922	有倦怠	中度倦怠	35-39岁	主治医师	2-5年	50-60h	5-8次	三甲医院	大型	中部	1-3h	否	否	否	否	是	否	图文战报	每届都看	只看决赛/关键场次	无安排	偶尔	与同事/朋友	否	2	3	3	6	10	17	33
923	有倦怠	轻度倦怠	<30岁	住院医师	<2年	50-60h	5-8次	非三甲医院	大型	中部	1-3h	否	是	否	否	是	是	图文战报	偶尔看看	只看决赛/关键场次	无安排	偶尔	独自观看	否	3	2	3	8	9	8	25
924	无倦怠		<30岁	住院医师	>5年	>80h	≥9次	非三甲医院	大型	西部	3-5h	否	是	否	否	否	否	现场/公共场所	偶尔看看	通过集锦了解	无安排	偶尔	独自观看	否	3	3	2	4	4	3	11
925	有倦怠	中度倦怠	30-34岁	副主任医师	>5年	61-70h	≥9次	非三甲医院	大型	中部	<1h	否	是	是	否	是	否	图文战报	偶尔看看	全程跟踪重要比赛	无安排	偶尔	球迷组织活动	是	3	3	3	13	8	9	30
926	有倦怠	轻度倦怠	<30岁	住院医师	<2年	50-60h	≤4次	三甲医院	大型	西部	>5h	是	是	否	否	否	否	直播	每届都看	全程跟踪重要比赛	无安排	经常	独自观看	否	3	3	4	5	6	5	16
927	有倦怠	中度倦怠	<30岁	住院医师	2-5年	61-70h	5-8次	三甲医院	大型	西部	1-3h	是	是	否	否	否	否	短视频片段	偶尔看看	参与线上讨论	无安排	偶尔	独自观看	否	3	3	3	15	10	6	31
928	无倦怠		35-39岁	主治医师	2-5年	50-60h	≤4次	非三甲医院	大型	东北	3-5h	否	否	否	否	是	是	直播	每届都看	全程跟踪重要比赛	无安排	偶尔	独自观看	否	2	3	3	5	4	4	13
929	有倦怠	中度倦怠	40-44岁	主任医师	>5年	61-70h	5-8次	非三甲医院	小型	中部	>5h	否	否	否	否	是	否	直播	基本不看	只看决赛/关键场次	无安排	从不	独自观看	否	3	2	4	18	7	7	32
930	有倦怠	中度倦怠	40-44岁	副主任医师	>5年	61-70h	5-8次	三甲医院	大型	中部	3-5h	否	否	否	否	否	是	直播	主要看中国队比赛	通过集锦了解	无安排	偶尔	独自观看	否	3	3	3	11	10	10	31
931	无倦怠		40-44岁	主治医师	>5年	61-70h	5-8次	非三甲医院	中型	西部	>5h	是	否	否	否	否	否	直播	每届都看	参与线上讨论	休息区播放	经常	独自观看	否	3	3	3	3	4	2	9
932	有倦怠	轻度倦怠	30-34岁	主治医师	>5年	50-60h	5-8次	三甲医院	大型	东部	<1h	否	否	否	否	是	是	直播	主要看中国队比赛	只看决赛/关键场次	无安排	经常	球迷组织活动	否	3	3	3	8	11	7	26
933	无倦怠		35-39岁	主治医师	>5年	50-60h	5-8次	非三甲医院	大型	东北	3-5h	是	是	否	否	否	是	图文战报	每届都看	全程跟踪重要比赛	调班排版	偶尔	独自观看	否	3	3	3	5	3	2	10
934	有倦怠	中度倦怠	30-34岁	主治医师	2-5年	61-70h	5-8次	三甲医院	大型	西部	<1h	否	是	是	否	否	否	直播	主要看中国队比赛	只看决赛/关键场次	无安排	偶尔	与家人	否	3	3	3	11	11	11	33
935	有倦怠	中度倦怠	30-34岁	主治医师	2-5年	50-60h	5-8次	三甲医院	大型	西部	3-5h	否	否	是	是	否	否	短视频片段	每届都看	只看决赛/关键场次	无安排	偶尔	与同事/朋友	是	3	3	3	13	8	10	31
936	有倦怠	轻度倦怠	<30岁	住院医师	<2年	71-80h	≥9次	非三甲医院	中型	东部	3-5h	否	否	否	是	是	否	现场/公共场所	主要看中国队比赛	只看决赛/关键场次	无安排	偶尔	独自观看	是	3	3	4	9	8	10	27
937	有倦怠	轻度倦怠	35-39岁	主治医师	>5年	50-60h	5-8次	非三甲医院	小型	中部	1-3h	是	是	是	否	否	否	图文战报	主要看中国队比赛	参与线上讨论	无安排	偶尔	球迷组织活动	否	3	3	3	7	8	7	22
938	有倦怠	中度倦怠	35-39岁	主治医师	>5年	50-60h	5-8次	三甲医院	大型	西部	3-5h	否	是	否	否	是	否	短视频片段	每届都看	全程跟踪重要比赛	无安排	偶尔	独自观看	否	3	3	3	9	12	11	32
939	有倦怠	中度倦怠	30-34岁	主治医师	2-5年	50-60h	≤4次	三甲医院	大型	西部	<1h	否	否	否	否	否	是	短视频片段	主要看中国队比赛	参与线上讨论	无安排	从不	独自观看	是	2	3	2	10	9	13	32
940	有倦怠	中度倦怠	40-44岁	副主任医师	>5年	50-60h	5-8次	三甲医院	小型	东部	<1h	否	是	否	否	否	否	直播	每届都看	全程跟踪重要比赛	无安排	偶尔	独自观看	是	3	2	4	13	8	11	32
941	无倦怠		≥45岁	主任医师	>5年	71-80h	5-8次	三甲医院	大型	东北	<1h	否	否	否	否	是	否	短视频片段	基本不看	只看决赛/关键场次	无安排	经常	独自观看	否	3	3	3	5	3	6	14
942	有倦怠	中度倦怠	30-34岁	主治医师	2-5年	>80h	5-8次	三甲医院	大型	西部	3-5h	是	是	否	是	否	否	直播	每届都看	只看决赛/关键场次	无安排	偶尔	与同事/朋友	否	3	3	3	12	13	7	32
943	无倦怠		30-34岁	副主任医师	2-5年	50-60h	≤4次	非三甲医院	小型	东北	3-5h	是	是	否	否	否	是	直播	主要看中国队比赛	参与线上讨论	无安排	经常	与同事/朋友	否	3	3	3	6	4	4	14
944	有倦怠	轻度倦怠	35-39岁	主治医师	>5年	50-60h	5-8次	三甲医院	大型	东北	3-5h	否	否	否	否	是	否	图文战报	主要看中国队比赛	参与线上讨论	无安排	偶尔	独自观看	否	3	4	3	5	10	3	18
945	无倦怠		≥45岁	副主任医师	>5年	50-60h	5-8次	三甲医院	大型	东部	3-5h	是	是	是	否	否	否	直播	主要看中国队比赛	只看决赛/关键场次	无安排	经常	与同事/朋友	否	4	3	3	7	3	3	13
946	有倦怠	轻度倦怠	30-34岁	主治医师	2-5年	50-60h	5-8次	三甲医院	大型	中部	<1h	否	是	否	否	否	是	直播	每届都看	全程跟踪重要比赛	无安排	偶尔	独自观看	否	2	3	3	8	12	7	27
947	无倦怠		40-44岁	副主任医师	>5年	<50h	≥9次	三甲医院	大型	东部	3-5h	是	否	否	否	是	否	短视频片段	主要看中国队比赛	只看决赛/关键场次	无安排	偶尔	与同事/朋友	否	3	3	2	5	3	6	14
948	有倦怠	轻度倦怠	40-44岁	副主任医师	>5年	71-80h	≥9次	三甲医院	大型	东北	<1h	是	否	否	否	否	是	短视频片段	主要看中国队比赛	全程跟踪重要比赛	无安排	经常	与家人	否	2	2	3	9	8	5	22
949	有倦怠	轻度倦怠	35-39岁	主治医师	>5年	50-60h	≤4次	非三甲医院	中型	中部	<1h	是	是	是	是	是	否	直播	主要看中国队比赛	参与线上讨论	无安排	从不	球迷组织活动	否	3	3	2	8	9	10	27
950	有倦怠	中度倦怠	30-34岁	主治医师	2-5年	50-60h	≤4次	三甲医院	小型	中部	<1h	否	否	否	否	否	是	现场/公共场所	主要看中国队比赛	通过集锦了解	无安排	偶尔	与家人	是	3	3	3	13	10	12	35
951	有倦怠	中度倦怠	35-39岁	主治医师	>5年	71-80h	≥9次	非三甲医院	大型	西部	<1h	是	否	否	否	否	否	短视频片段	偶尔看看	只看决赛/关键场次	无安排	偶尔	球迷组织活动	否	3	3	3	6	10	16	32
952	无倦怠		35-39岁	副主任医师	2-5年	50-60h	≤4次	三甲医院	大型	中部	3-5h	否	否	否	否	否	是	直播	主要看中国队比赛	只看决赛/关键场次	无安排	偶尔	与家人	否	3	3	3	3	4	5	12
953	有倦怠	轻度倦怠	35-39岁	副主任医师	>5年	50-60h	≤4次	三甲医院	大型	中部	1-3h	是	否	否	否	否	否	短视频片段	每届都看	参与线上讨论	无安排	偶尔	独自观看	否	3	3	2	4	10	6	20
954	有倦怠	轻度倦怠	30-34岁	主治医师	2-5年	50-60h	5-8次	非三甲医院	中型	中部	<1h	是	是	是	否	是	否	直播	主要看中国队比赛	只看决赛/关键场次	休息区播放	偶尔	独自观看	否	3	3	3	6	7	5	18
955	有倦怠	中度倦怠	35-39岁	主治医师	>5年	61-70h	5-8次	三甲医院	大型	中部	<1h	否	否	否	否	否	是	图文战报	每届都看	全程跟踪重要比赛	无安排	偶尔	与家人	是	2	2	3	8	13	12	33
956	有倦怠	轻度倦怠	30-34岁	主治医师	2-5年	71-80h	≥9次	非三甲医院	大型	东北	<1h	是	是	否	否	否	否	短视频片段	主要看中国队比赛	全程跟踪重要比赛	无安排	经常	球迷组织活动	否	3	3	3	8	10	3	21
957	有倦怠	轻度倦怠	40-44岁	副主任医师	>5年	61-70h	≥9次	非三甲医院	中型	东部	1-3h	是	是	是	是	是	否	直播	每届都看	只看决赛/关键场次	无安排	偶尔	与同事/朋友	否	3	2	2	8	6	10	24
958	无倦怠		≥45岁	主任医师	>5年	50-60h	5-8次	三甲医院	大型	东北	3-5h	是	否	是	否	否	否	现场/公共场所	主要看中国队比赛	只看决赛/关键场次	休息区播放	经常	与同事/朋友	否	3	3	2	8	3	2	13
959	有倦怠	中度倦怠	≥45岁	副主任医师	>5年	50-60h	5-8次	三甲医院	小型	东部	3-5h	是	否	否	否	否	否	短视频片段	偶尔看看	通过集锦了解	无安排	经常	与同事/朋友	否	3	4	3	13	11	10	34
960	有倦怠	轻度倦怠	<30岁	住院医师	<2年	71-80h	≥9次	三甲医院	大型	中部	<1h	否	是	否	否	否	否	直播	每届都看	只看决赛/关键场次	无安排	偶尔	与家人	否	3	3	3	6	7	11	24
961	有倦怠	中度倦怠	30-34岁	主治医师	2-5年	61-70h	5-8次	三甲医院	中型	东部	>5h	否	否	否	否	否	是	直播	每届都看	只看决赛/关键场次	无安排	经常	独自观看	是	3	3	3	12	13	5	30
962	有倦怠	轻度倦怠	30-34岁	主治医师	2-5年	50-60h	≤4次	三甲医院	大型	东部	<1h	否	否	否	否	否	是	直播	主要看中国队比赛	只看决赛/关键场次	无安排	偶尔	独自观看	否	3	2	3	8	11	5	24
963	有倦怠	重度倦怠	≥45岁	副主任医师	>5年	>80h	5-8次	非三甲医院	小型	东北	1-3h	否	否	是	否	否	否	短视频片段	主要看中国队比赛	参与线上讨论	无安排	从不	与同事/朋友	否	2	3	3	9	18	15	42
964	有倦怠	中度倦怠	35-39岁	主治医师	>5年	50-60h	≤4次	三甲医院	大型	东北	<1h	是	是	否	否	否	否	短视频片段	主要看中国队比赛	全程跟踪重要比赛	无安排	偶尔	与同事/朋友	否	4	4	2	7	11	13	31
965	无倦怠		≥45岁	主治医师	>5年	61-70h	5-8次	非三甲医院	中型	东北	>5h	是	是	否	否	否	否	现场/公共场所	每届都看	全程跟踪重要比赛	无安排	偶尔	与家人	否	3	4	3	7	5	0	12
966	无倦怠		35-39岁	主任医师	>5年	50-60h	5-8次	非三甲医院	中型	东部	3-5h	否	否	否	否	否	是	直播	每届都看	只看决赛/关键场次	无安排	经常	独自观看	否	3	3	3	5	3	6	14
967	有倦怠	轻度倦怠	35-39岁	主治医师	>5年	>80h	≥9次	非三甲医院	中型	东部	<1h	是	是	否	否	否	否	直播	主要看中国队比赛	通过集锦了解	无安排	偶尔	独自观看	否	3	3	2	11	5	11	27
968	有倦怠	重度倦怠	40-44岁	主任医师	>5年	71-80h	≤4次	三甲医院	大型	东北	<1h	否	否	否	否	否	是	短视频片段	主要看中国队比赛	全程跟踪重要比赛	无安排	偶尔	与家人	否	4	3	4	18	14	11	43
969	无倦怠		30-34岁	主治医师	<2年	50-60h	5-8次	三甲医院	中型	中部	3-5h	是	否	否	是	是	否	现场/公共场所	主要看中国队比赛	参与线上讨论	无安排	偶尔	与家人	否	3	3	2	4	4	6	14
970	有倦怠	轻度倦怠	35-39岁	主治医师	>5年	50-60h	5-8次	三甲医院	大型	东部	<1h	否	否	是	否	否	否	直播	基本不看	只看决赛/关键场次	无安排	偶尔	独自观看	否	2	3	3	9	7	5	21
971	有倦怠	轻度倦怠	30-34岁	主治医师	>5年	50-60h	5-8次	三甲医院	大型	中部	<1h	否	否	否	是	否	否	图文战报	每届都看	全程跟踪重要比赛	无安排	偶尔	独自观看	否	2	3	3	4	12	8	24
972	有倦怠	轻度倦怠	35-39岁	主治医师	>5年	50-60h	≤4次	非三甲医院	小型	西部	3-5h	否	否	是	否	是	否	直播	主要看中国队比赛	只看决赛/关键场次	无安排	经常	独自观看	否	3	3	4	9	11	3	23
973	有倦怠	重度倦怠	40-44岁	副主任医师	>5年	>80h	5-8次	非三甲医院	中型	东部	>5h	否	否	否	否	是	否	直播	基本不看	只看决赛/关键场次	无安排	偶尔	独自观看	否	2	4	3	16	14	14	44
974	有倦怠	轻度倦怠	<30岁	住院医师	2-5年	71-80h	5-8次	三甲医院	大型	东部	3-5h	是	是	否	是	否	否	短视频片段	每届都看	全程跟踪重要比赛	无安排	偶尔	独自观看	否	3	3	3	7	6	13	26
975	有倦怠	重度倦怠	30-34岁	主治医师	2-5年	71-80h	5-8次	非三甲医院	中型	东部	<1h	否	否	是	否	是	否	直播	主要看中国队比赛	全程跟踪重要比赛	无安排	偶尔	独自观看	是	3	2	3	15	18	13	46
976	无倦怠		35-39岁	主治医师	2-5年	>80h	≥9次	非三甲医院	小型	西部	3-5h	否	否	否	否	是	是	短视频片段	每届都看	只看决赛/关键场次	无安排	偶尔	独自观看	否	3	3	3	6	3	3	12
977	有倦怠	中度倦怠	30-34岁	住院医师	<2年	61-70h	≥9次	三甲医院	大型	东部	1-3h	是	否	否	否	否	否	直播	每届都看	只看决赛/关键场次	无安排	经常	独自观看	否	3	3	2	9	10	11	30
978	有倦怠	重度倦怠	40-44岁	副主任医师	>5年	>80h	5-8次	非三甲医院	大型	东部	<1h	否	否	是	否	否	否	直播	主要看中国队比赛	只看决赛/关键场次	无安排	从不	与同事/朋友	否	3	3	2	15	14	13	42
979	无倦怠		<30岁	住院医师	<2年	61-70h	5-8次	三甲医院	大型	东北	>5h	否	是	否	否	否	否	现场/公共场所	主要看中国队比赛	只看决赛/关键场次	无安排	偶尔	与同事/朋友	否	3	3	3	5	3	5	13
980	有倦怠	轻度倦怠	35-39岁	副主任医师	>5年	50-60h	5-8次	三甲医院	大型	西部	1-3h	是	是	否	否	否	否	直播	每届都看	只看决赛/关键场次	无安排	偶尔	独自观看	否	3	4	2	7	9	7	23
981	有倦怠	重度倦怠	≥45岁	主治医师	>5年	50-60h	5-8次	三甲医院	大型	东部	1-3h	否	是	是	否	否	否	短视频片段	偶尔看看	只看决赛/关键场次	无安排	偶尔	球迷组织活动	是	3	3	2	14	14	16	44
982	有倦怠	轻度倦怠	<30岁	住院医师	<2年	50-60h	5-8次	三甲医院	大型	西部	>5h	否	否	否	否	否	是	直播	每届都看	全程跟踪重要比赛	无安排	经常	独自观看	否	3	4	3	7	12	8	27
983	有倦怠	重度倦怠	<30岁	住院医师	<2年	71-80h	≥9次	非三甲医院	中型	西部	>5h	是	否	否	否	否	否	现场/公共场所	每届都看	只看决赛/关键场次	无安排	偶尔	独自观看	否	2	3	3	18	14	11	43
984	无倦怠		40-44岁	副主任医师	>5年	50-60h	5-8次	非三甲医院	中型	西部	<1h	是	否	否	是	否	是	直播	每届都看	通过集锦了解	无安排	偶尔	与同事/朋友	是	3	2	3	6	3	3	12
985	无倦怠		30-34岁	副主任医师	2-5年	50-60h	5-8次	三甲医院	大型	东北	<1h	是	否	否	否	是	是	短视频片段	主要看中国队比赛	只看决赛/关键场次	无安排	偶尔	独自观看	是	3	3	3	3	4	2	9
986	有倦怠	轻度倦怠	<30岁	住院医师	<2年	61-70h	5-8次	非三甲医院	小型	西部	3-5h	否	是	否	否	否	否	直播	主要看中国队比赛	全程跟踪重要比赛	无安排	偶尔	与同事/朋友	否	3	3	4	8	5	3	16
987	无倦怠		35-39岁	主任医师	>5年	71-80h	5-8次	三甲医院	大型	西部	>5h	是	否	否	否	否	是	直播	偶尔看看	只看决赛/关键场次	无安排	从不	与同事/朋友	否	3	3	2	4	4	4	12
988	有倦怠	中度倦怠	40-44岁	副主任医师	>5年	61-70h	≥9次	三甲医院	中型	东北	1-3h	否	否	否	否	是	否	图文战报	每届都看	全程跟踪重要比赛	无安排	经常	与家人	否	4	3	3	8	14	9	31
989	无倦怠		40-44岁	副主任医师	>5年	61-70h	5-8次	三甲医院	中型	西部	<1h	是	是	否	否	否	否	直播	每届都看	全程跟踪重要比赛	无安排	偶尔	与同事/朋友	否	3	3	2	5	3	1	9
990	有倦怠	轻度倦怠	<30岁	住院医师	<2年	50-60h	5-8次	非三甲医院	小型	中部	1-3h	是	是	否	否	否	是	直播	主要看中国队比赛	全程跟踪重要比赛	调班排版	经常	独自观看	否	2	3	3	8	11	5	24
991	无倦怠		≥45岁	主任医师	>5年	50-60h	5-8次	三甲医院	大型	东北	3-5h	是	否	是	否	否	否	现场/公共场所	每届都看	全程跟踪重要比赛	无安排	偶尔	独自观看	否	4	3	3	8	3	2	13
992	有倦怠	轻度倦怠	<30岁	住院医师	<2年	50-60h	≤4次	三甲医院	大型	中部	<1h	是	是	是	是	否	否	短视频片段	主要看中国队比赛	只看决赛/关键场次	无安排	偶尔	独自观看	否	3	3	3	9	7	5	21
993	有倦怠	重度倦怠	35-39岁	主治医师	>5年	61-70h	5-8次	三甲医院	大型	西部	1-3h	否	是	否	是	否	否	短视频片段	每届都看	只看决赛/关键场次	无安排	从不	与家人	否	3	3	4	15	13	15	43
994	有倦怠	轻度倦怠	30-34岁	主治医师	2-5年	50-60h	≤4次	三甲医院	中型	东部	1-3h	是	否	否	是	否	否	图文战报	每届都看	全程跟踪重要比赛	无安排	从不	与家人	否	3	3	3	9	8	8	25
995	有倦怠	中度倦怠	40-44岁	主治医师	>5年	61-70h	5-8次	非三甲医院	大型	东部	<1h	是	否	是	否	否	是	直播	主要看中国队比赛	通过集锦了解	无安排	偶尔	与家人	是	4	3	3	13	6	12	31
996	有倦怠	轻度倦怠	<30岁	住院医师	<2年	<50h	≤4次	非三甲医院	小型	西部	3-5h	否	是	否	否	否	否	现场/公共场所	主要看中国队比赛	参与线上讨论	无安排	偶尔	与同事/朋友	否	2	2	3	5	6	6	17
997	无倦怠		35-39岁	主治医师	2-5年	50-60h	5-8次	三甲医院	大型	西部	3-5h	否	否	是	否	否	否	短视频片段	主要看中国队比赛	通过集锦了解	无安排	偶尔	独自观看	否	4	4	3	4	4	6	14
998	有倦怠	中度倦怠	30-34岁	主治医师	>5年	50-60h	5-8次	三甲医院	大型	西部	<1h	是	否	否	否	否	否	直播	每届都看	只看决赛/关键场次	无安排	从不	与同事/朋友	是	3	3	2	9	13	9	31
999	有倦怠	中度倦怠	35-39岁	主治医师	>5年	50-60h	5-8次	三甲医院	小型	东北	1-3h	否	否	否	否	是	否	直播	主要看中国队比赛	全程跟踪重要比赛	无安排	偶尔	独自观看	否	3	3	3	10	8	14	32
1000	无倦怠		40-44岁	副主任医师	>5年	71-80h	5-8次	非三甲医院	中型	西部	3-5h	是	否	否	否	否	否	短视频片段	偶尔看看	通过集锦了解	调班排版	偶尔	独自观看	是	2	2	3	5	3	6	14
1001	无倦怠		40-44岁	副主任医师	>5年	50-60h	≥9次	非三甲医院	中型	西部	3-5h	是	是	否	是	是	否	图文战报	每届都看	通过集锦了解	无安排	偶尔	独自观看	否	3	3	3	4	5	3	12
1002	有倦怠	轻度倦怠	40-44岁	副主任医师	>5年	50-60h	5-8次	三甲医院	大型	西部	3-5h	是	是	是	是	否	否	现场/公共场所	主要看中国队比赛	只看决赛/关键场次	无安排	偶尔	与家人	是	4	2	3	7	13	5	25
